# Supplementary material for: Enantioselective reduction of N-alkyl ketimines with frustrated Lewis pair catalysis using chiral borenium ions
Source: Royal Society of Chemistry journal article supplement (doi:10.1039/c9cc02900a), 2019-01-01
Supplement: c9cc02900a1.pdf [file c9cc02900a1.pdf]

## Electronic Supplementary Information

### Enantioselective reduction of *N*-alkyl ketimines with frustrated Lewis pair catalysis using chiral borenium ions

Dan M. Mercea,<sup>a</sup> Michael G. Howlett,<sup>a</sup> Adam D. Piascik,<sup>a</sup> Daniel J. Scott,<sup>a</sup> Alan Steven,<sup>b</sup> Andrew E. Ashley<sup>a</sup> and Matthew J. Fuchter<sup>\*,a</sup>

*a. Department of Chemistry, Imperial College London, Molecular Sciences Research Hub, White City Campus, Wood Lane, London, UK, W12 0BZ*

*b. AstraZeneca PT&D, Charter Way, Macclesfield, UK, SK10 2NA*

Data files are openly available (DOI: 10.14469/hpc/5645).

## Contents

|                                                                                                      |    |
|------------------------------------------------------------------------------------------------------|----|
| 1. General considerations .....                                                                      | 1  |
| 2. Catalyst synthesis and characterisation .....                                                     | 2  |
| 2.1 Guttmann-Beckett Lewis acidity measurement for <b>2a</b> .....                                   | 5  |
| 2.2 DOSY NMR studies for <b>2a</b> .....                                                             | 6  |
| 2.3 X-Ray diffraction data for <b>2a</b> .....                                                       | 10 |
| 2.4 Preparation of catalyst <b>2e</b> <i>via</i> counterion exchange .....                           | 12 |
| 2.5 IBiox borohydride precursors <b>3b</b> and <b>3c</b> .....                                       | 15 |
| 3. Substrate preparation and copies of NMR spectra .....                                             | 18 |
| 4. Hydrosilylation catalysis .....                                                                   | 32 |
| 4.1 NMR characterisation for <i>N</i> -silylamine <b>9c</b> .....                                    | 32 |
| 4.2 NMR monitoring and mechanistic interpretation .....                                              | 38 |
| 4.3 Copies of reaction NMR spectra for <b>4a-c</b> .....                                             | 41 |
| 4.4 Catalyst <b>2e</b> assessment .....                                                              | 44 |
| 5. Hydrogenation catalysis .....                                                                     | 45 |
| 5.1 Reaction development .....                                                                       | 46 |
| 6. General procedure for the synthesis of racemic amines and acetamides .....                        | 48 |
| 7. Characterisation data .....                                                                       | 50 |
| 7.1 Characterisation data for chiral enantioenriched amines <b>5</b> and copies of NMR spectra ..... | 50 |
| 7.2 Characterisation data for acetamides <b>10</b> .....                                             | 62 |
| 7.3 HPLC data for amines <b>5a,b</b> and acetamides <b>10</b> .....                                  | 65 |
| 8. References .....                                                                                  | 73 |

## 1. General considerations

Glassware was oven-dried at temperatures >80 °C and allowed to cool under vacuum or in an inert atmosphere. Manipulations involving moisture or oxygen-sensitive materials were carried out either in an inert atmosphere glovebox or by using standard Schlenk line techniques. 1,2-difluorobenzene and dichloromethane were dried by distilling from calcium hydride and stored over activated 4Å molecular sieves and degassed. Toluene was stored over potassium mirrors. PhMe<sub>2</sub>SiH and Ph<sub>2</sub>MeSiH were stored over activated 4Å molecular sieves. Yields refer to isolated

yields. Optical rotations were determined on a Bellingham+Stanley polarimeter model ADP440+, concentrations are reported in g/100 mL. IR data was collected using a Perkin Elmer Cary 630 FTIR instrument. NMR data was collected on Bruker AV-400MHz, AV-500MHz and DRX-400MHz instruments. Enantiomeric ratios were determined using HPLC with a chiral stationary phase: Chiralcel OD-H; integrations are reported rounded to the nearest 0.5. HPLC method development was carried out using racemic authentic samples. Where necessary analysis was carried out on the *N*-acetyl derivatives. Elemental microanalysis was carried out by Stephen Boyer at London Metropolitan University. Melting points are uncorrected.

## 2. Catalyst synthesis and characterisation

To a solution of hydride **3a** (890 mg, 2.49 mmol, 1 equiv.) in toluene (~100 mL) was added, with vigorous stirring, a solution of HNTf<sub>2</sub> (699 mg, 2.49 mmol, 1 equiv.) in toluene (~20 mL) dropwise over 1-2 min. Gas evolution and precipitate formation was observed. Stirring was continued for 1 h after which the yellow supernatant was removed. To the resulting solid was added toluene (~50 mL) then following stirring for 30 min the supernatant was removed. The resulting white solid was dried under high vacuum. Yield: 1.156g, 1.81 mmol, 73% yield; elemental microanalysis calculated for C<sub>23</sub>H<sub>34</sub>BF<sub>6</sub>N<sub>3</sub>O<sub>6</sub>S<sub>2</sub> %C 43.34, %H 5.38, %N 6.59, found: %C 43.51, %H 5.31, %N 6.78.

<sup>1</sup>H (400 MHz, CD<sub>2</sub>Cl<sub>2</sub>) 5.22 (m, 4H), 5.09 (m, 2H), 2.25 (m, 2H), 2.08 (m, 8H), 1.87 (m, 4H), 1.35 (m, 2H), 1.07 (d, *J* = 7 Hz, 6H), 0.83 (d, *J* = 6.9 Hz, 6H); <sup>13</sup>C (100 MHz, CD<sub>2</sub>Cl<sub>2</sub>) 132.4, 120.5 (q), 78.3, 66.5, 35.2, 34.6, 33.3, 29.8, 23.1, 19, 14.5; <sup>19</sup>F (376 MHz, CD<sub>2</sub>Cl<sub>2</sub>) -79.5; <sup>11</sup>B (128 MHz, CD<sub>2</sub>Cl<sub>2</sub>) 73 (FWHM 1160Hz);

Jun08-2016.82.1.1r  
DM 2-149 concentrated

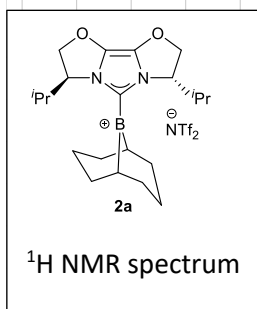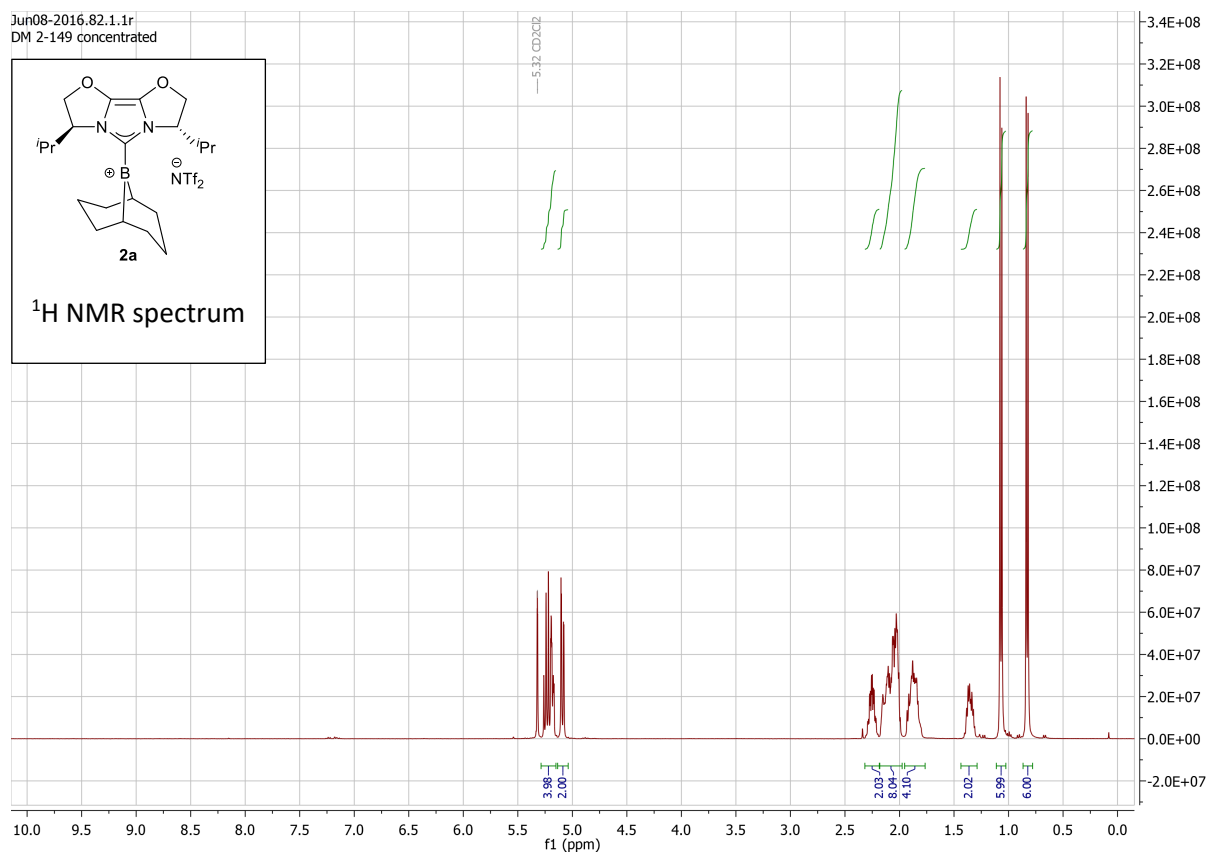

Jun08-2016.80.1.1r  
DM 2-149 concentrated

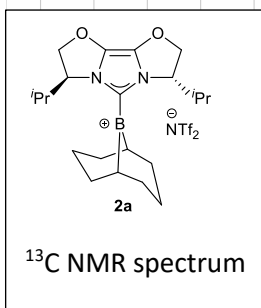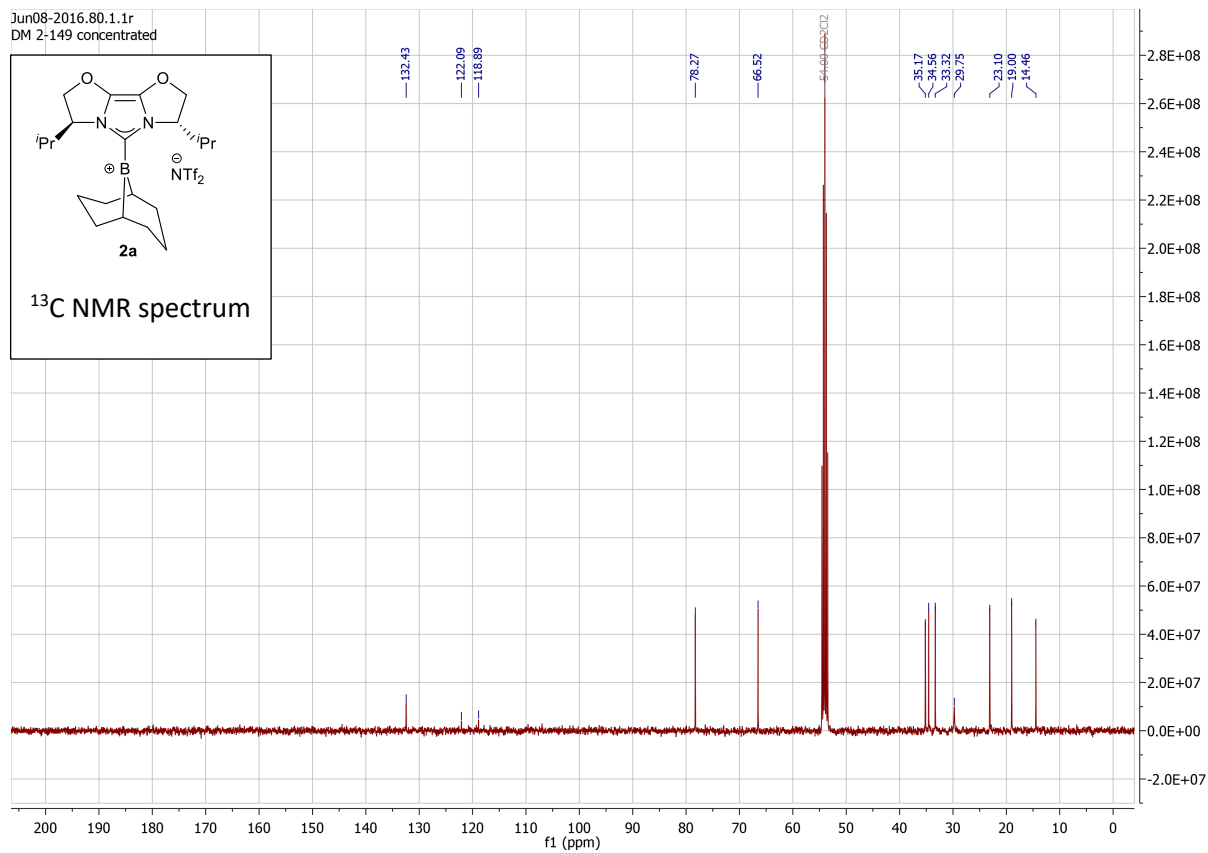



Jun08-2016.81.1.1r  
DM 2-149 concentrated

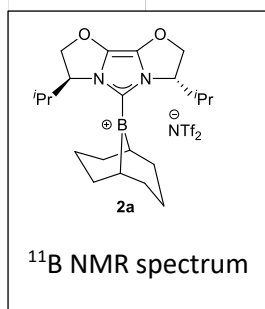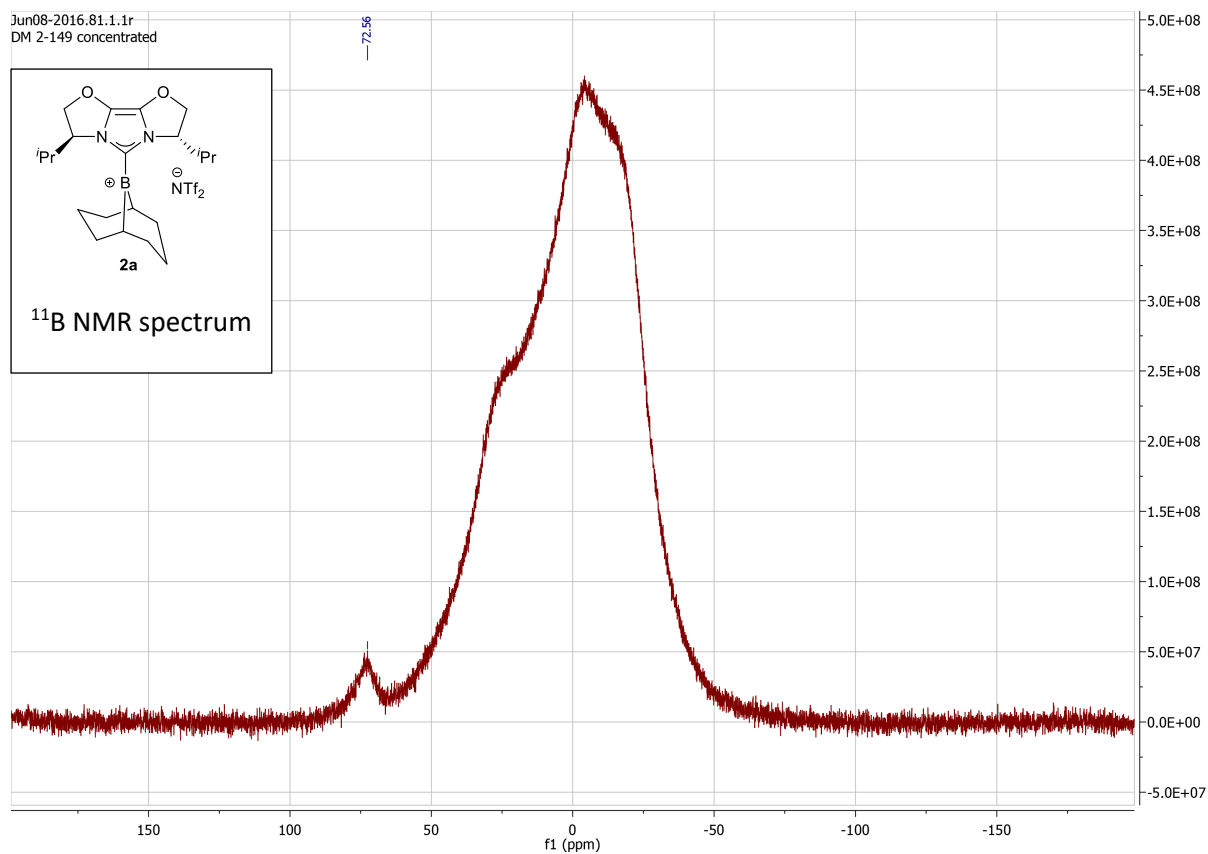

Jun08-2016.83.1.1r  
DM 2-149 concentrated

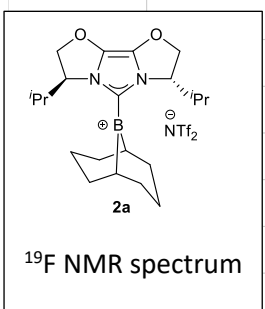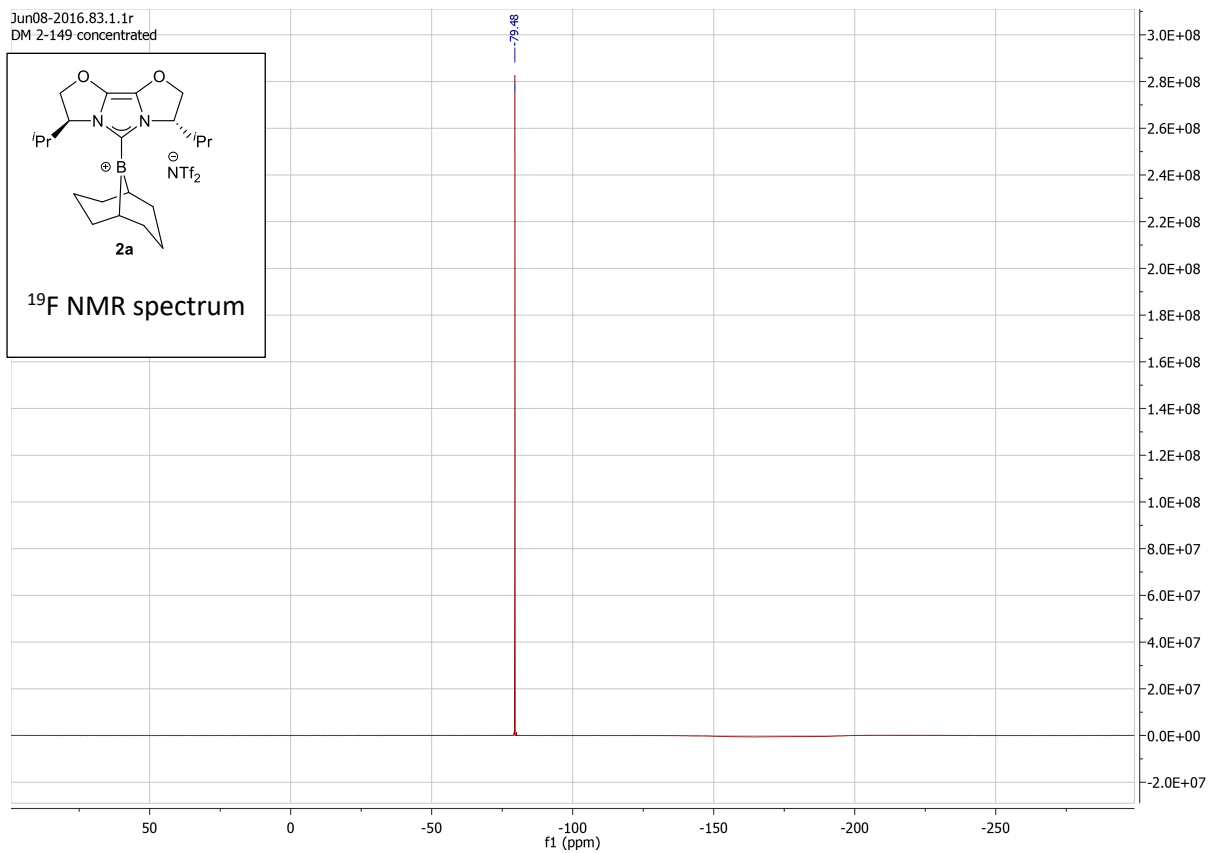

## 2.1 Guttmann-Beckett Lewis acidity measurement for **2a**

A solution containing Et<sub>3</sub>PO (27mg, 0.02 mmol, 1 equiv.) and **2a** (38.2 mg, 0.06 mmol, 3 equiv.) was prepared in DCM (0.4 mL) and transferred to a Young's tap NMR tube. A capillary insert containing a solution of Et<sub>3</sub>PO in CD<sub>2</sub>Cl<sub>2</sub> was added.

$$AN = 100(72.93 - 41)/(86.14 - 41) = 70.7$$

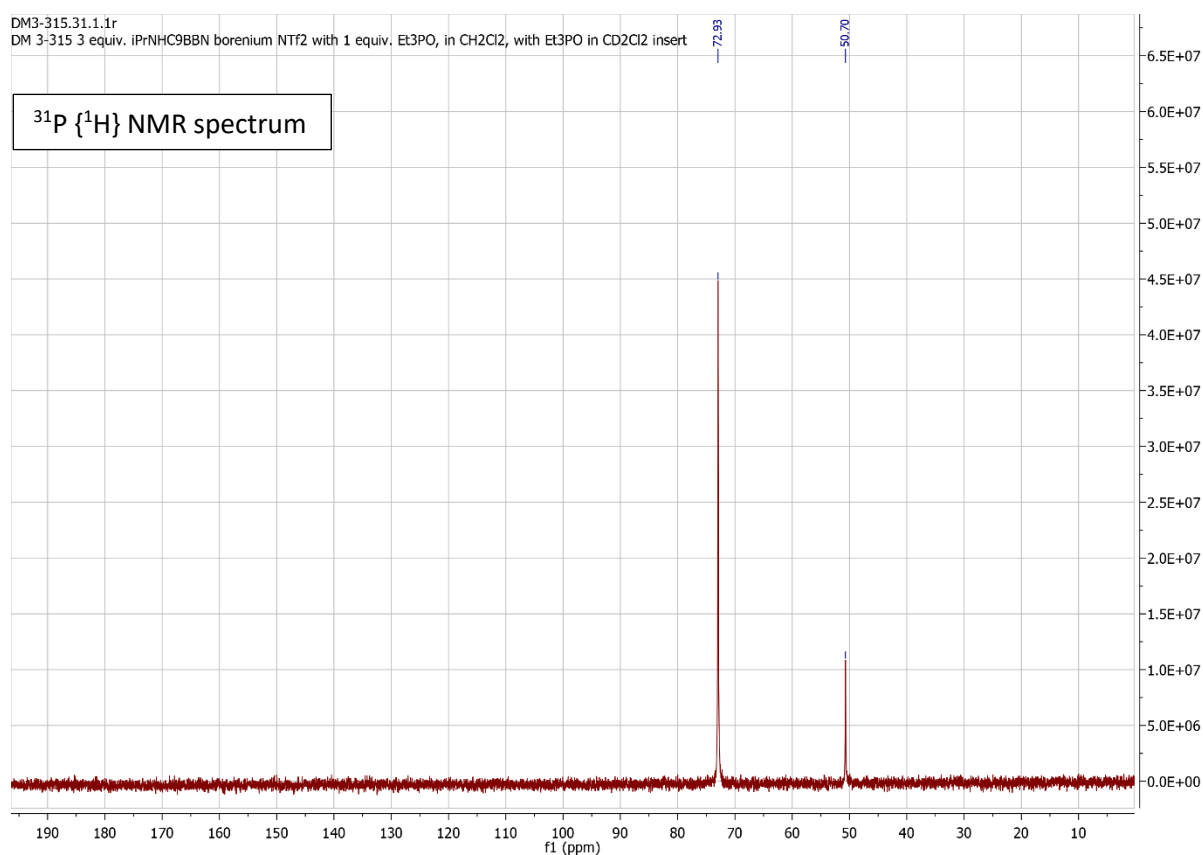

## 2.2 DOSY NMR studies for **2a**

A solution containing **2a** (5.4 mg, 0.0084 mmol, 1 equiv.) and PhF (1.6  $\mu$ L, 0.0168 mmol, 2 equiv.) was prepared in  $\text{CD}_2\text{Cl}_2$  (0.6 mL). An aliquot was diluted tenfold and submitted for NMR analysis.

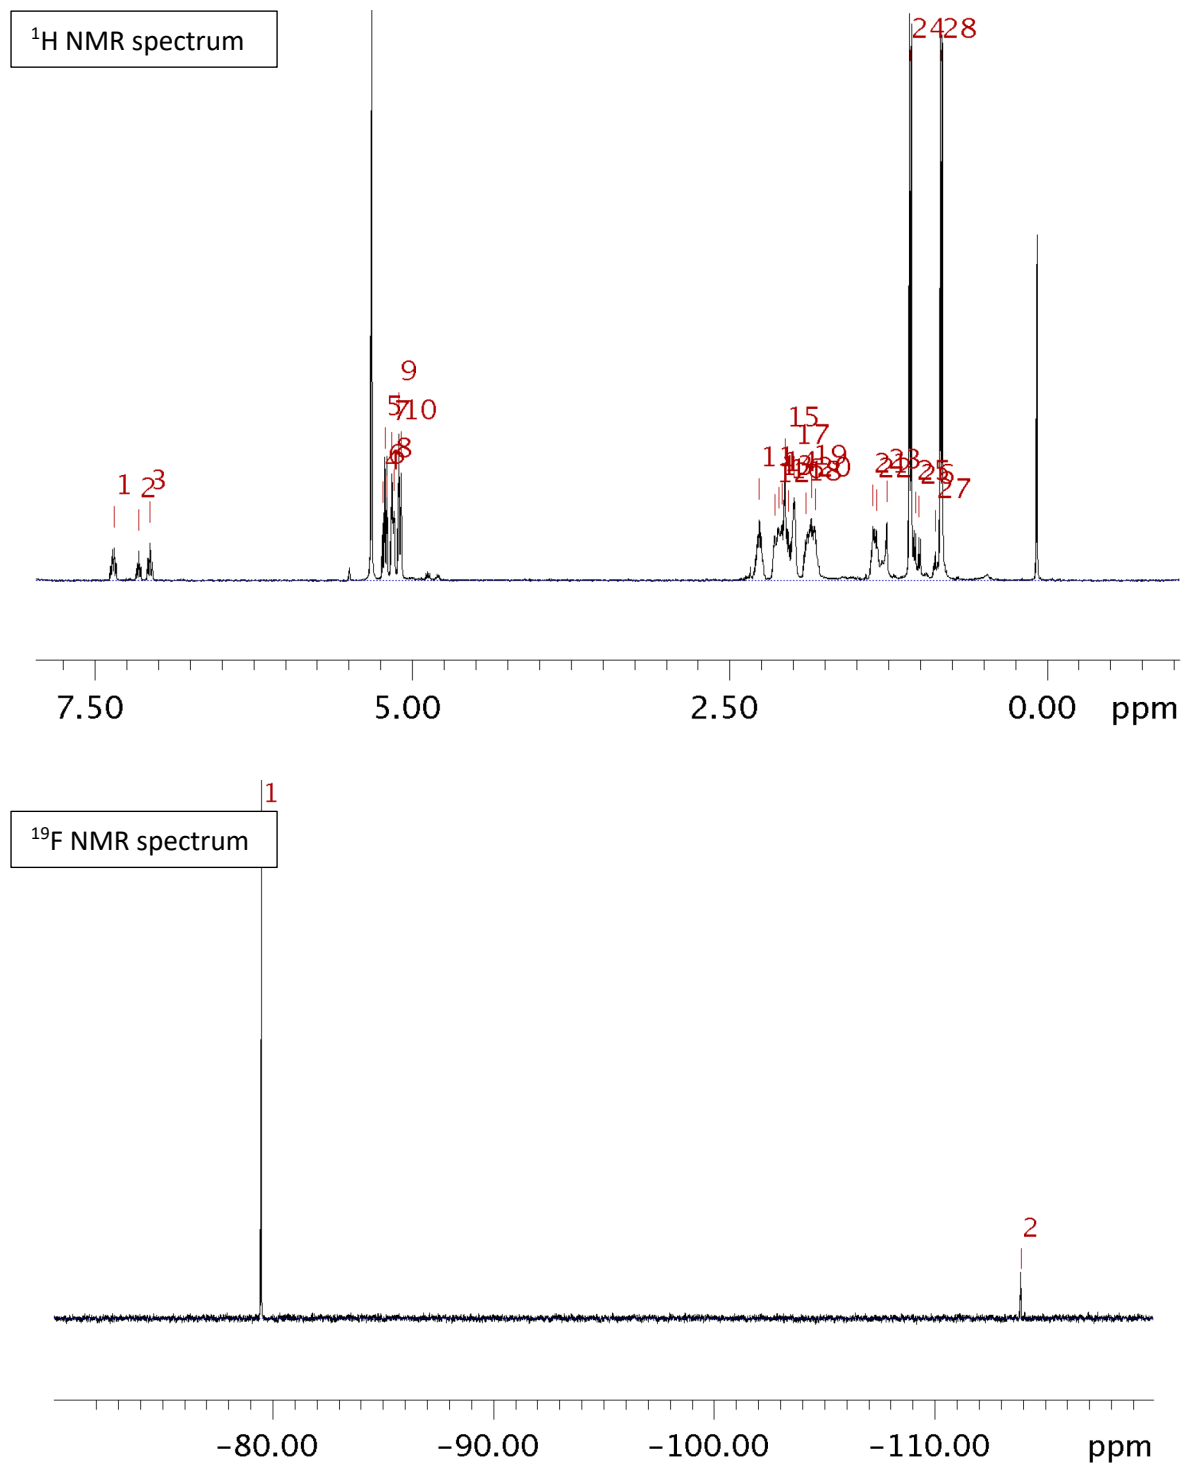

|                                        |                                                                                                                 |
|----------------------------------------|-----------------------------------------------------------------------------------------------------------------|
| Fitted function:                       | $f(x) = A * \exp(-D * x^2 * \gamma^2 * \text{littleDelta}^2 / (\text{bigDelta} - \text{littleDelta}/3) * 10^4)$ |
| used gamma:                            | 26752 rad/(s*Gauss)                                                                                             |
| used little delta:                     | 0.0030000 s                                                                                                     |
| used big delta:                        | 0.014900 s                                                                                                      |
| used gradient strength:                | variable                                                                                                        |
| Random error estimation of data:       | RMS per spectrum (or trace/plane)                                                                               |
| Systematic error estimation of data:   | worst case per peak scenario                                                                                    |
| Fit parameter Error estimation method: | from Monte Carlo simulations                                                                                    |
| Confidence level:                      | 95%                                                                                                             |
| Used peaks:                            | peaks from<br>/opt/topspin/data/mf/nmr/~TEMP/1/pdata/1/peaklist.xml                                             |
| Used integrals:                        | peak intensities                                                                                                |
| Used Gradient strength:                | all values (including replicates) used                                                                          |

| Peak name | F2 [ppm] | D [m2/s] | error     |
|-----------|----------|----------|-----------|
| 1         | 7.349    | 3.16e-09 | 7.736e-11 |
| 2         | 7.154    | 3.22e-09 | 9.449e-11 |
| 3         | 7.066    | 3.17e-09 | 7.987e-11 |
| 4         | 5.234    | 1.18e-09 | 1.273e-10 |
| 5         | 5.217    | 1.17e-09 | 2.792e-10 |
| 6         | 5.199    | 1.19e-09 | 1.495e-10 |
| 7         | 5.162    | 1.17e-09 | 2.113e-10 |
| 8         | 5.147    | 1.19e-09 | 1.391e-10 |
| 9         | 5.107    | 1.19e-09 | 1.133e-10 |
| 10        | 5.089    | 1.19e-09 | 5.719e-11 |
| 11        | 2.269    | 1.17e-09 | 2.187e-10 |
| 12        | 2.149    | 1.16e-09 | 9.960e-11 |
| 13        | 2.118    | 1.17e-09 | 1.276e-10 |
| 14        | 2.090    | 1.17e-09 | 1.278e-10 |
| 15        | 2.066    | 1.16e-09 | 8.441e-12 |
| 16        | 2.037    | 1.18e-09 | 1.806e-10 |
| 17        | 1.993    | 1.17e-09 | 9.871e-11 |
| 18        | 1.903    | 1.16e-09 | 2.104e-11 |
| 19        | 1.859    | 1.20e-09 | 1.612e-10 |
| 20        | 1.827    | 1.21e-09 | 1.162e-10 |
| 21        | 1.373    | 1.16e-09 | 8.204e-11 |
| 22        | 1.345    | 1.18e-09 | 1.519e-10 |
| 23        | 1.263    | 1.24e-09 | 1.564e-11 |
| 24        | 1.084    | 1.20e-09 | 1.552e-12 |
| 25        | 1.037    | 1.24e-09 | 2.144e-11 |
| 26        | 1.011    | 1.24e-09 | 2.293e-11 |
| 27        | 0.880    | 1.58e-09 | 4.244e-11 |
| 28        | 0.839    | 1.19e-09 | 1.645e-12 |

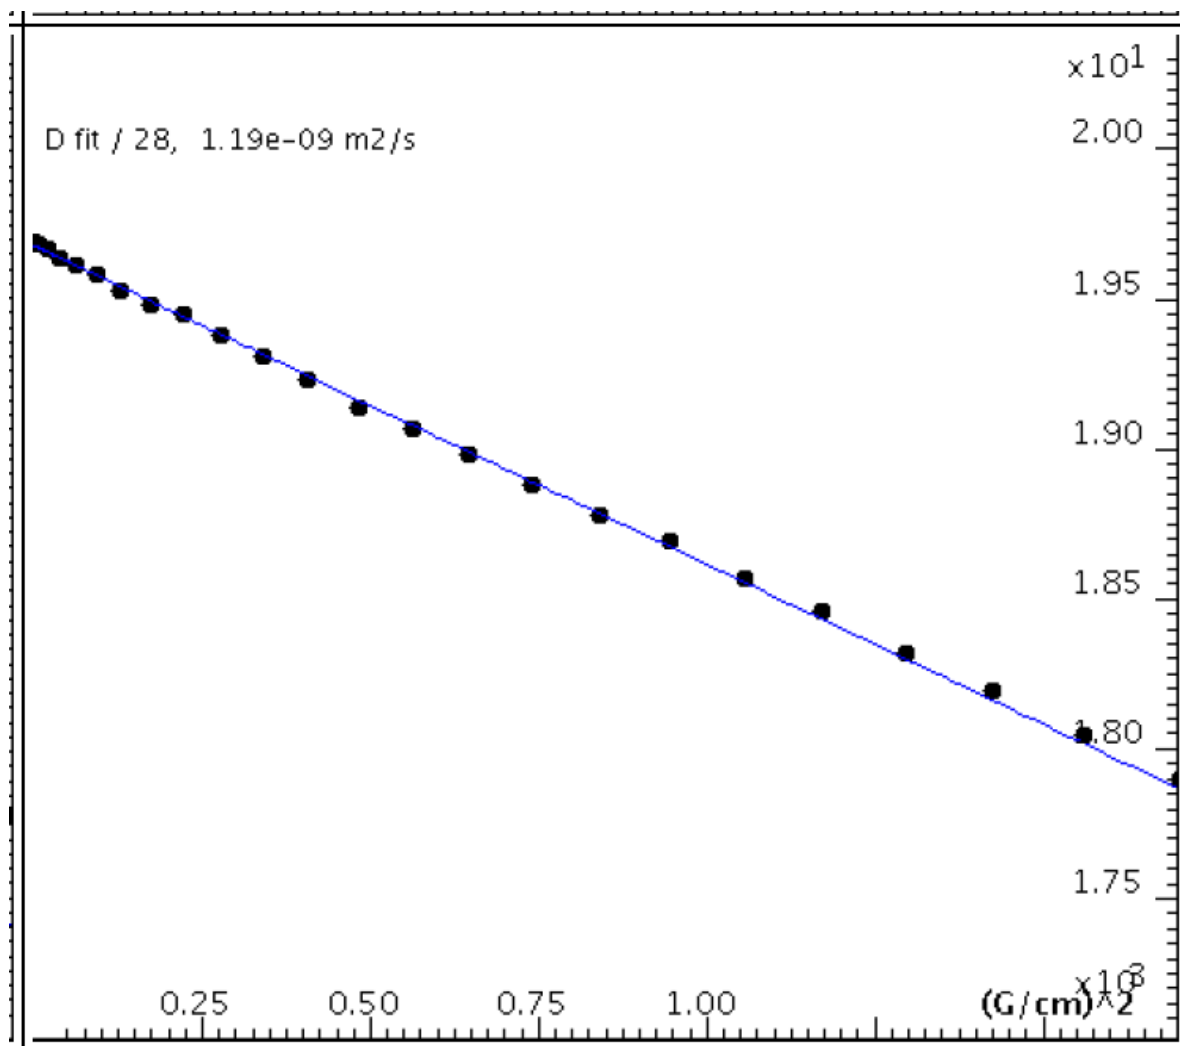

|                                        |                                                                                                                                     |
|----------------------------------------|-------------------------------------------------------------------------------------------------------------------------------------|
| Fitted function:                       | $f(x) = A \cdot \exp(-D \cdot x^2 \cdot \gamma^2 \cdot \text{littleDelta}^2 / (\text{bigDelta} - \text{littleDelta}/3) \cdot 10^4)$ |
| used gamma:                            | 25172 rad/(s*Gauss)                                                                                                                 |
| used little delta:                     | 0.0030000 s                                                                                                                         |
| used big delta:                        | 0.014900 s                                                                                                                          |
| used gradient strength:                | variable                                                                                                                            |
| Random error estimation of data:       | RMS per spectrum (or trace/plane)                                                                                                   |
| Systematic error estimation of data:   | worst case per peak scenario                                                                                                        |
| Fit parameter Error estimation method: | from Monte Carlo simulations                                                                                                        |
| Confidence level:                      | 95%                                                                                                                                 |
| Used peaks:                            | peaks from<br>/opt/topspin/data/mf/nmr/~TEMP/1/pdata/1/peaklist.xml                                                                 |
| Used integrals:                        | peak intensities                                                                                                                    |
| Used Gradient strength:                | all values (including replicates) used                                                                                              |

| Peak name | F2 [ppm] | D [m²/s] | error     |
|-----------|----------|----------|-----------|
| 1         | -79.492  | 1.12e-09 | 7.164e-12 |
| 2         | -113.899 | 2.66e-09 | 2.129e-10 |

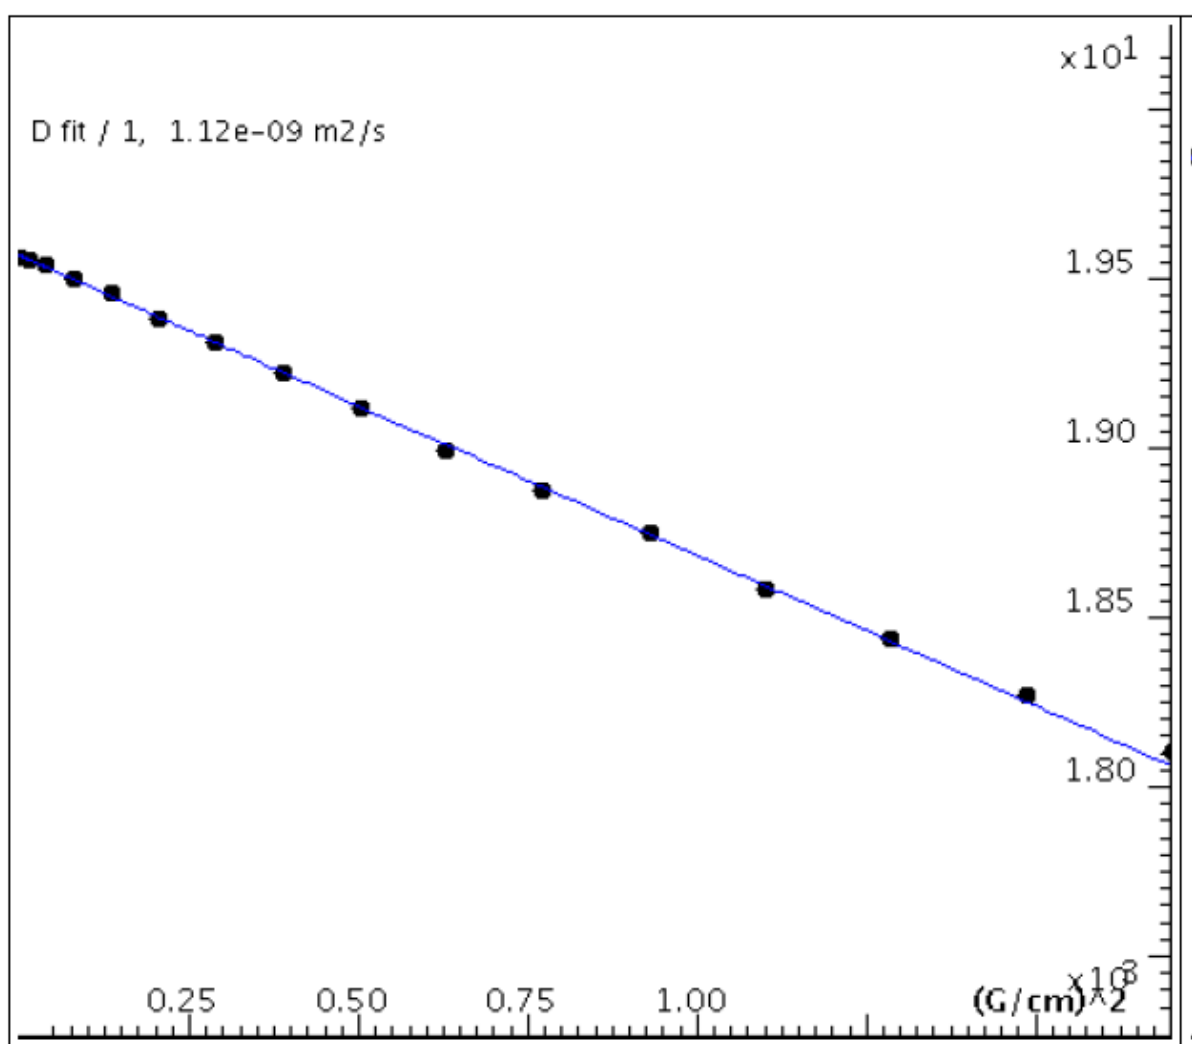

### 2.3 X-Ray diffraction data for **2a**

Crystals of suitable quality for X-ray diffraction studies of **2a** were grown using vapour diffusion of pentane at room temperature into a solution of **2a** (2 mg in 0.5 mL 1,2-DFB). Single crystal X-ray diffraction data was collected with an Oxford Diffraction Xcalibur unit; crystals were mounted on a nylon MicroLoop™ using perfluoropolyether oil and measured in a stream of N<sub>2</sub> at 173 K. All structures were solved using the Superflip charge flipping package.<sup>1</sup> All data were subsequently refined with the ShelXL refinement package.<sup>2</sup> CCDC 1902956 contains the supplementary crystallographic data for this paper. These data can be obtained free of charge from The Cambridge Crystallographic Data Centre via [www.ccdc.cam.ac.uk/structures](http://www.ccdc.cam.ac.uk/structures).

|                                                |                                                                                              |          |
|------------------------------------------------|----------------------------------------------------------------------------------------------|----------|
| Elemental formula                              | C <sub>23</sub> H <sub>34</sub> BF <sub>6</sub> N <sub>3</sub> O <sub>6</sub> S <sub>2</sub> |          |
| Formula weight                                 | 637.5                                                                                        |          |
| Crystal system, Space group                    | Trigonal, P 32                                                                               |          |
| Unit cell dimensions                           | a = 10.6336(3) Å                                                                             | α = 90°  |
|                                                | b = 10.6336(3) Å                                                                             | β = 90°  |
|                                                | c = 22.5220(7) Å                                                                             | γ = 120° |
| Volume, Z                                      | 2205.45(14) Å <sup>3</sup> , 3                                                               |          |
| Calculated density                             | 1.440 Mg/m <sup>3</sup>                                                                      |          |
| F(000)                                         | 996                                                                                          |          |
| Absorption coefficient                         | 0.261 mm <sup>-1</sup>                                                                       |          |
| Temperature                                    | 173.05(10) K                                                                                 |          |
| Wavelength                                     | 0.71073 Å                                                                                    |          |
| Crystal colour / morphology                    | colourless block                                                                             |          |
| Crystal size                                   | 0.575 × 0.299 × 0.219 mm <sup>3</sup>                                                        |          |
| θ range for data collection                    | 2.7 to 28.2°                                                                                 |          |
| Index Ranges                                   | -13 ≤ h ≤ 12, -14 ≤ k ≤ 9, -29 ≤ l ≤ 29                                                      |          |
| Completeness to θ = 25.2°                      | 99.7 %                                                                                       |          |
| Absorption correction                          | Analytical                                                                                   |          |
| Max. and min. transmission                     | 0.957 and 0.915                                                                              |          |
| Reflections collected (not including absences) | 8361                                                                                         |          |
| No. of unique reflections                      | 5821 [R <sub>int</sub> for equivalents = 0.020]                                              |          |
| No. of 'observed' reflections [I > 2σ(I)]      | 4911                                                                                         |          |
| Structure determined by:                       | dual methods, in SIR-92                                                                      |          |
| Refinement method:                             | Full-matrix least-squares on F <sup>2</sup>                                                  |          |

|                                   |                                             |
|-----------------------------------|---------------------------------------------|
| Data / restraints / parameters    | 5821 / 1 / 446                              |
| Goodness-of-fit on $F^2$          | 1.046                                       |
| Final R indices ('observed' data) | $R_1 = 0.055$ , $wR_2 = 0.114$              |
| Final R indices (all data)        | $R_1 = 0.070$ , $wR_2 = 0.124$              |
| Absolute structure parameter      | 0.01(4)                                     |
| Largest diff. peak and hole       | 0.46 and $-0.39 \text{ e } \text{\AA}^{-3}$ |

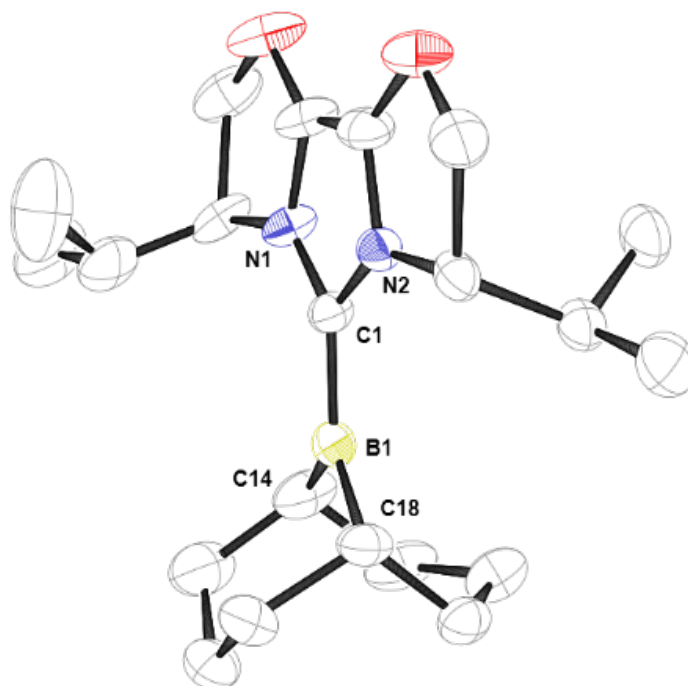

**Figure S1.** ORTEP diagram for structure **2a**. H atoms and  $\text{N}(\text{SO}_2\text{CF}_3)_2$  counteranion omitted for clarity. Thermal ellipsoids shown at 50% probability level. O atoms red, C atoms white, N atoms blue, B atom yellow.

The solid-state structure of **2a** shows the boron atom to be in a distorted trigonal planar geometry ( $\angle (\text{C1-B1-C14}) = 123.8(5)^\circ$ ,  $(\text{C1-B1-C18}) = 124.0(5)^\circ$ ,  $(\text{C14-B1-C18}) = 112.2(5)^\circ$ ). The  $\text{NTf}_2$  anion is non-coordinating with no close contacts to B, supporting an ionic assignment of the salt. The  $\text{B-C}_{\text{NHC}}$  distance for **2a** ( $1.540(7) \text{ \AA}$ ) is comparable to the value of  $1.580(3) \text{ \AA}$  reported in the literature for  $[(\text{I}^i\text{Pr}_2)(\text{BC}_8\text{H}_{14})][\text{B}(\text{C}_6\text{F}_5)_4]$ .<sup>3</sup>



## 2.4 Preparation of catalyst **2e** via counterion exchange

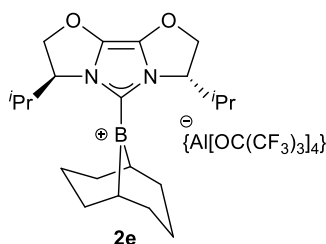

Exchange of  $\text{NTf}_2$  anion for  $\{\text{Al}[\text{OC}(\text{CF}_3)_3]_4\}$  anion was performed using either the Li or K  $\{\text{Al}[\text{OC}(\text{CF}_3)_3]_4\}$  salts. In a vial were mixed **2a** (159.3 mg, 0.25 mmol, 1 equiv.) and  $\text{Li}\{\text{Al}[\text{OC}(\text{CF}_3)_3]_4\}$  (243.5 mg, 0.25 mmol, 1 equiv.) and DCM (3 mL) was added. The mixture was stirred vigorously for 48 h after which it was filtered. The resulting solution was dried under high vacuum to give **2e** (240 mg, 0.18 mmol, 73% yield) as a white solid.

$^1\text{H}$  (400 MHz,  $\text{CDCl}_3$ ) 5.11 (m, 6H), 2.31-1.66 (m, 14H), 1.35 (m, 2H), 1.1 (d,  $J = 6.7$  Hz, 6H), 0.82 (d,  $J = 6.9$  Hz, 6H);  $^{13}\text{C}$  (100 MHz, 1,2- $\text{DFB}$ ) 75.5, 64.9, 32.9, 32.1, 31.4, 27.9, 20.7, 15.6, 11.1;  $^{19}\text{F}$  (376 MHz,  $\text{CDCl}_3$ )  $-75.5$ ;  $^{11}\text{B}$  (128 MHz, 1,2- $\text{DFB}$ ) 72.5 (br, FWHM 1432 Hz);  $^{27}\text{Al}$  (104 MHz, 1,2- $\text{DFB}$ ) 33.8.

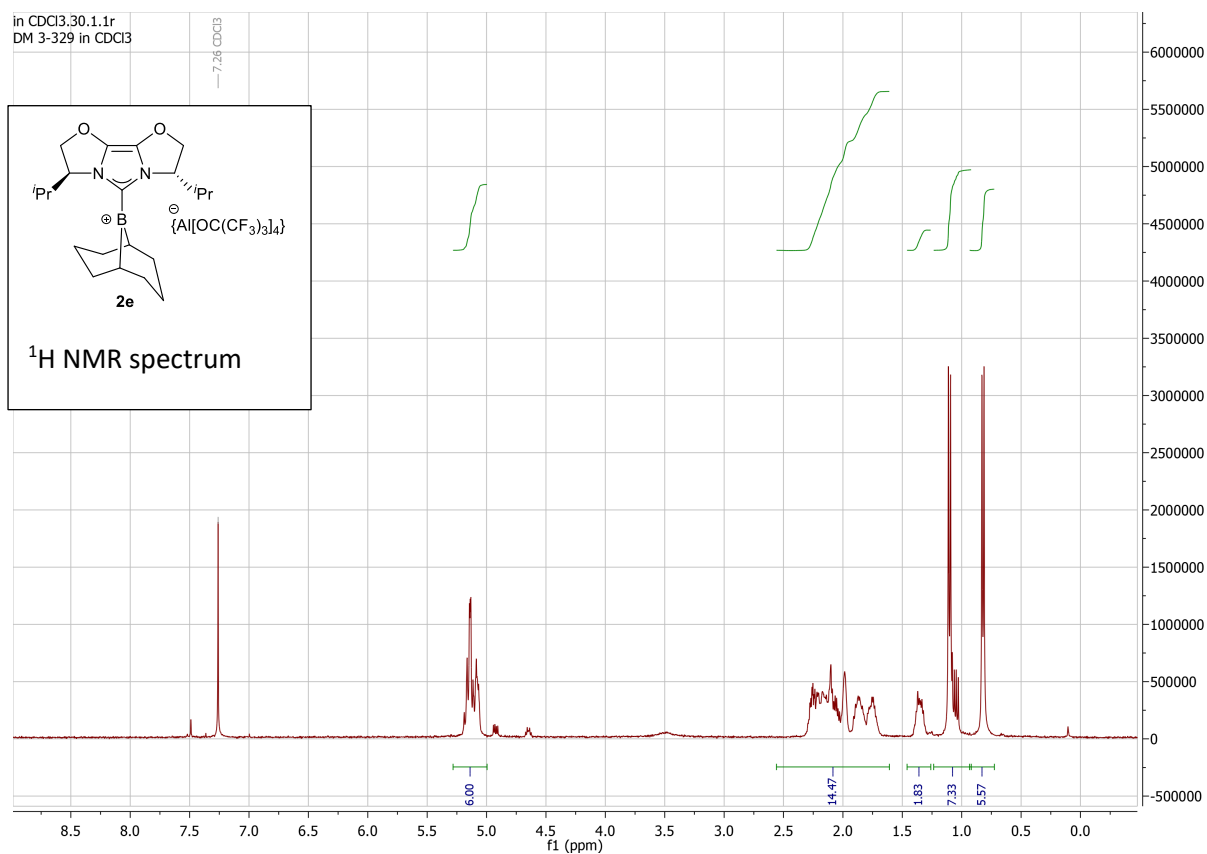

higher concentration.21.1.1r  
DM3-329 higher conc in 1,2-DFB

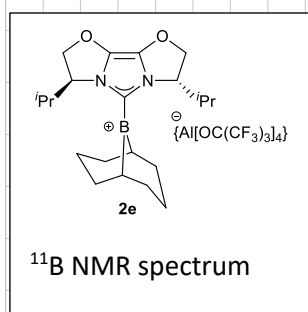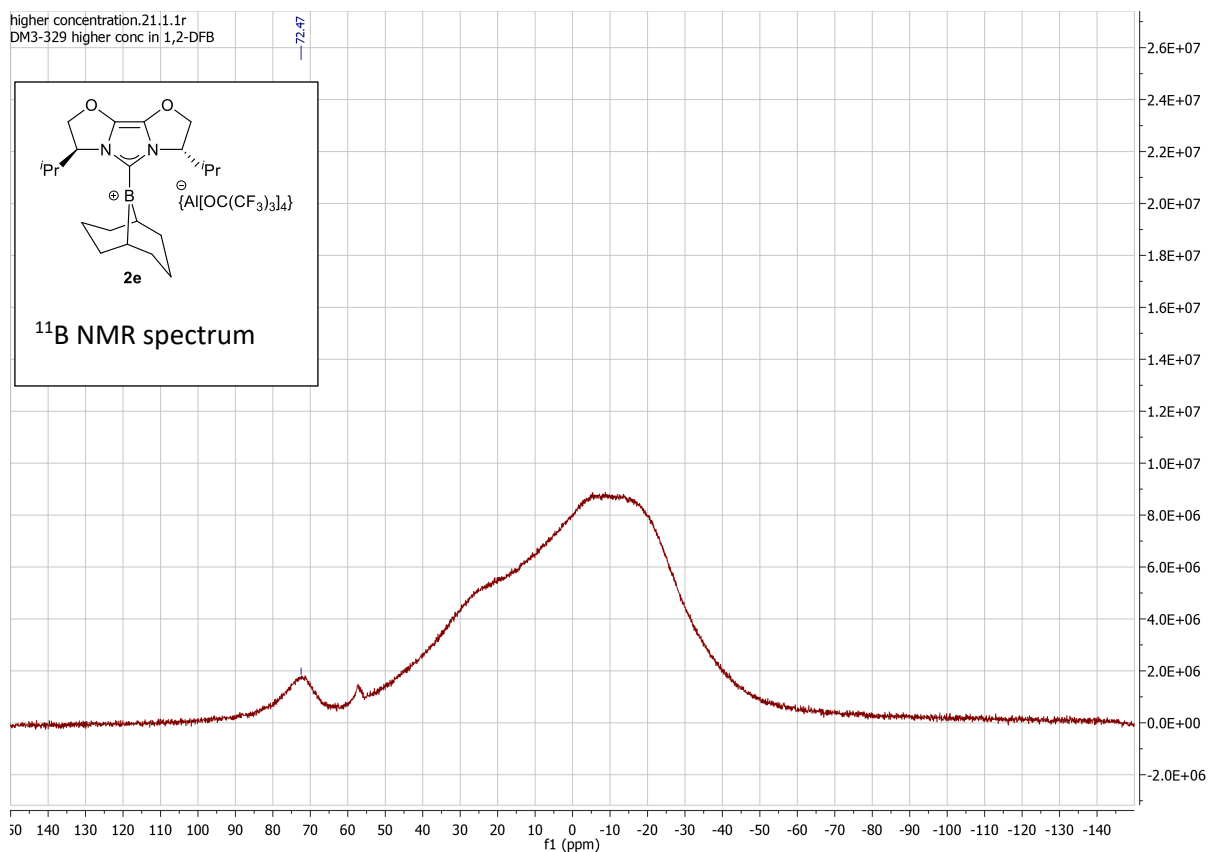

higher concentration.22.1.1r  
DM3-329 higher conc in 1,2-DFB

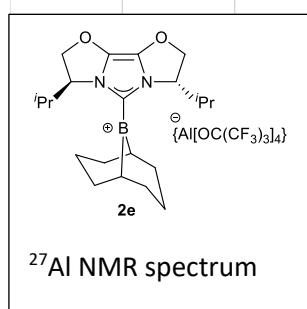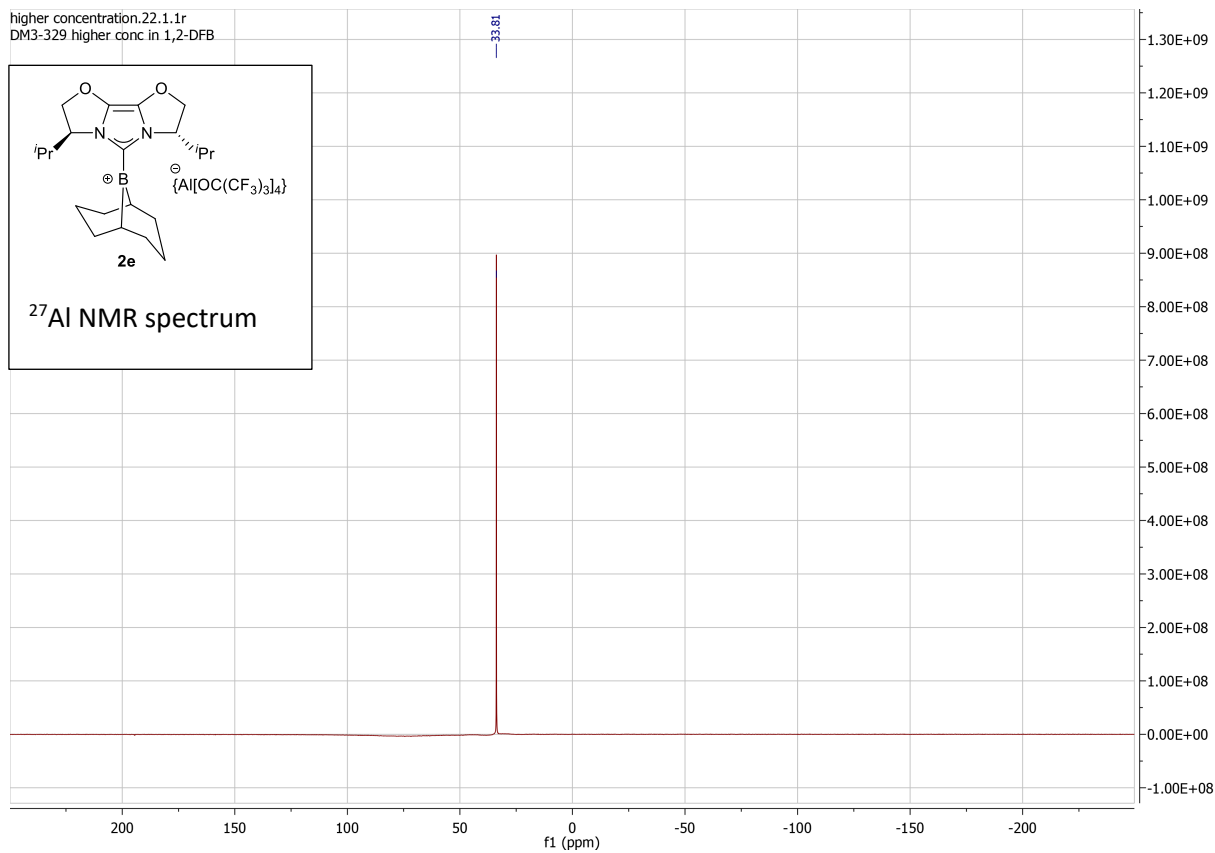

Feb08-2019.12.1.1r  
DM5-506

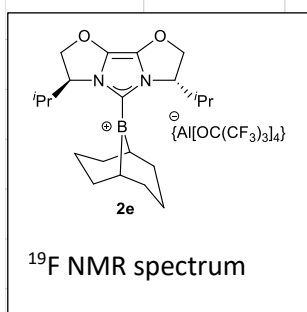

higher concentration; 24.1.1r  
DM3-329 higher conc in 1,2-DFB

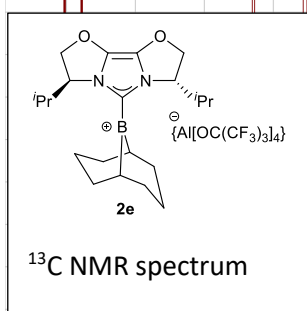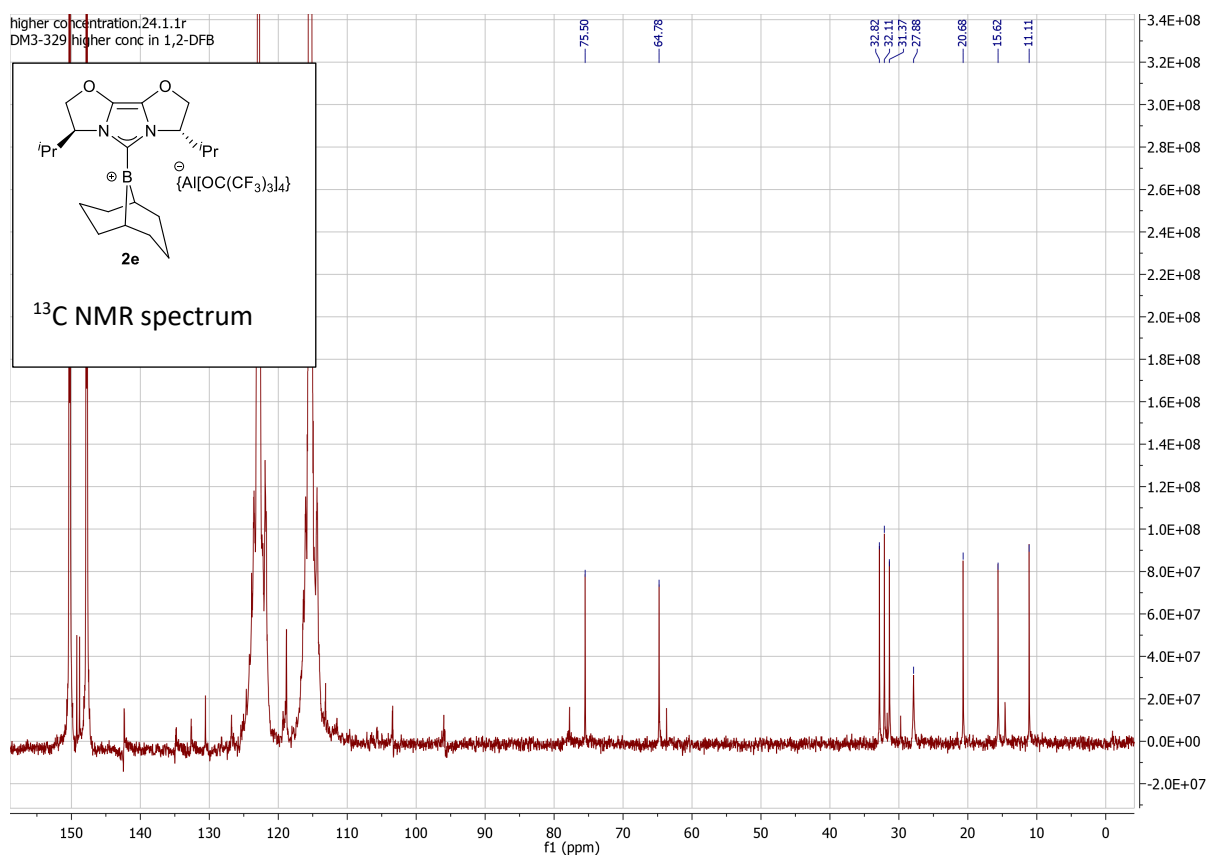

## 2.5 IBiox borohydride precursors **3b** and **3c**

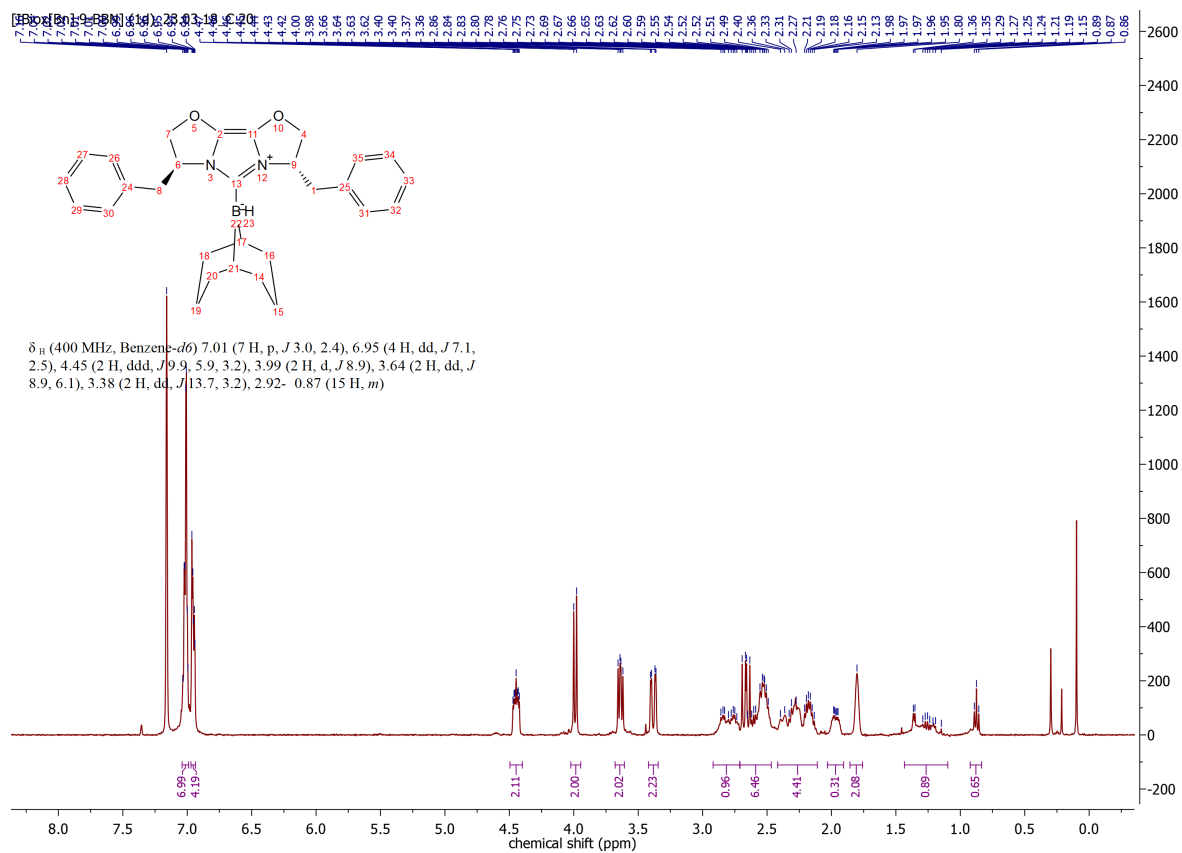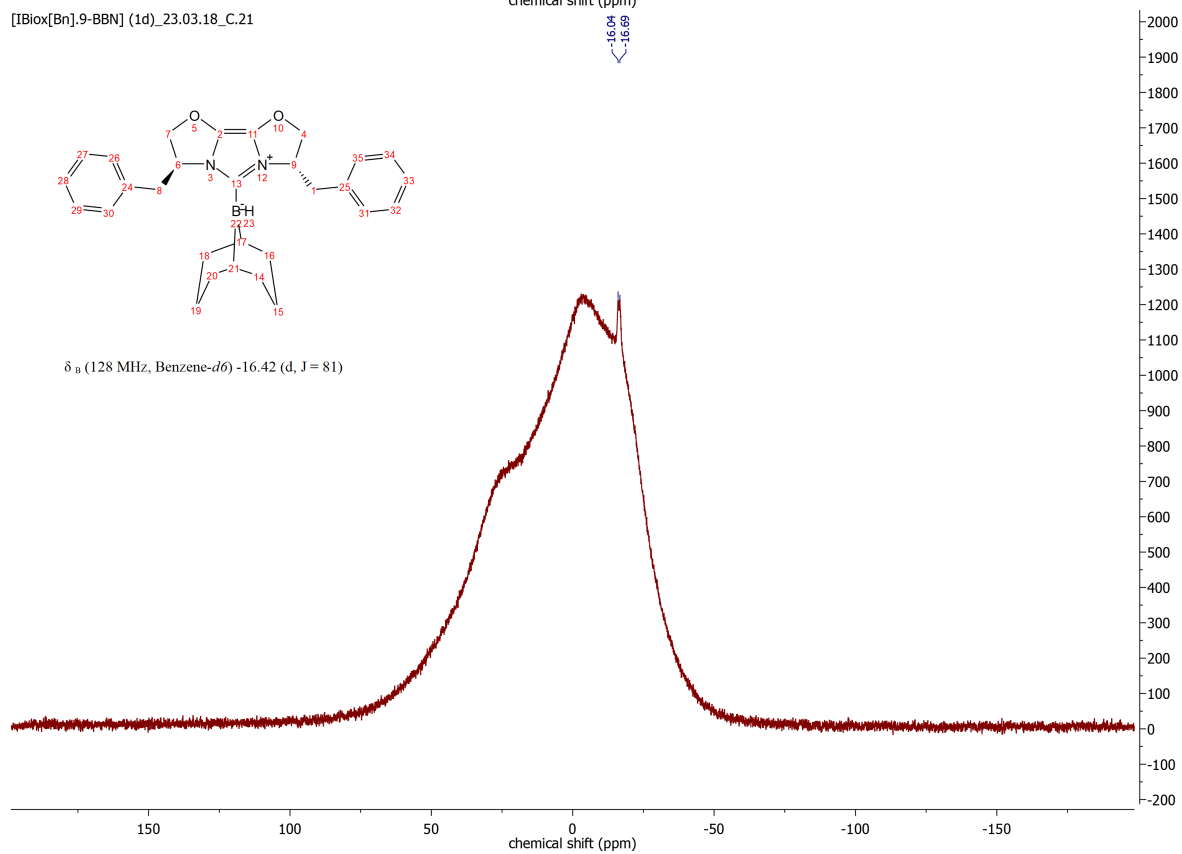

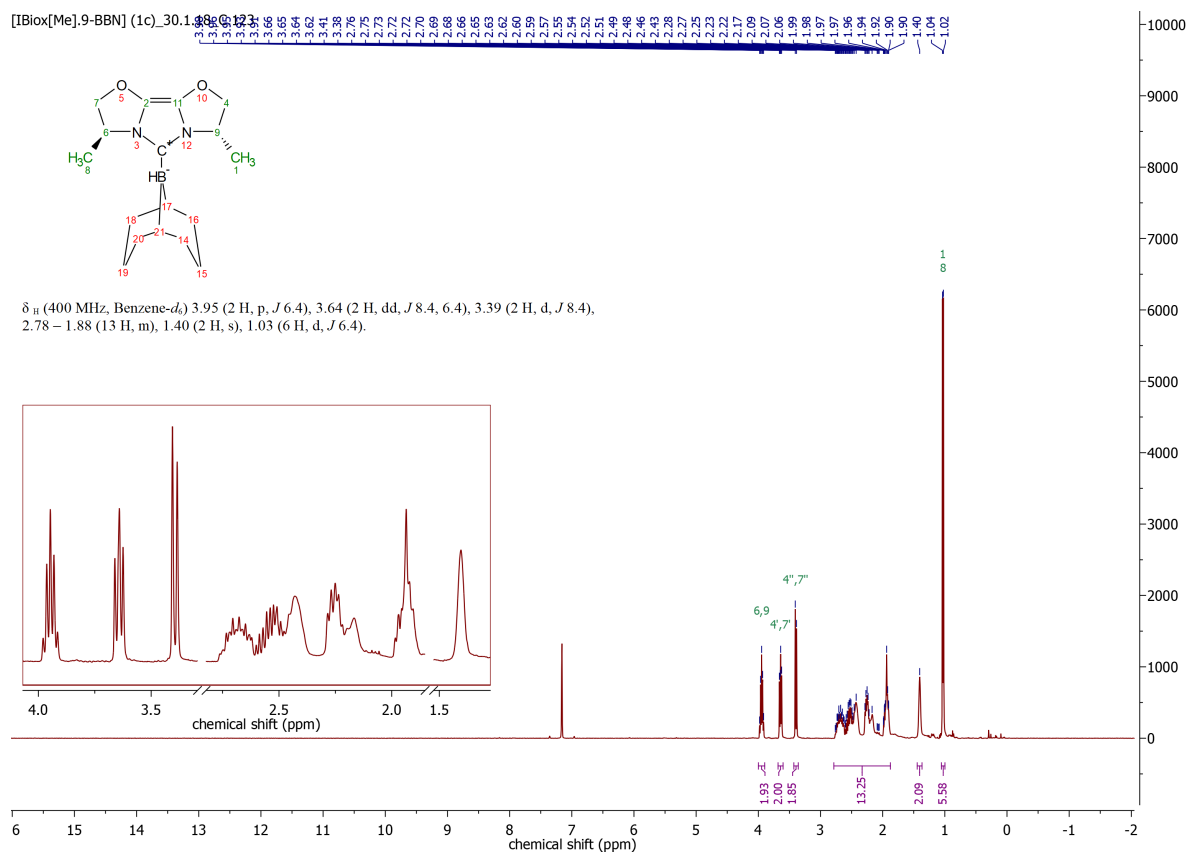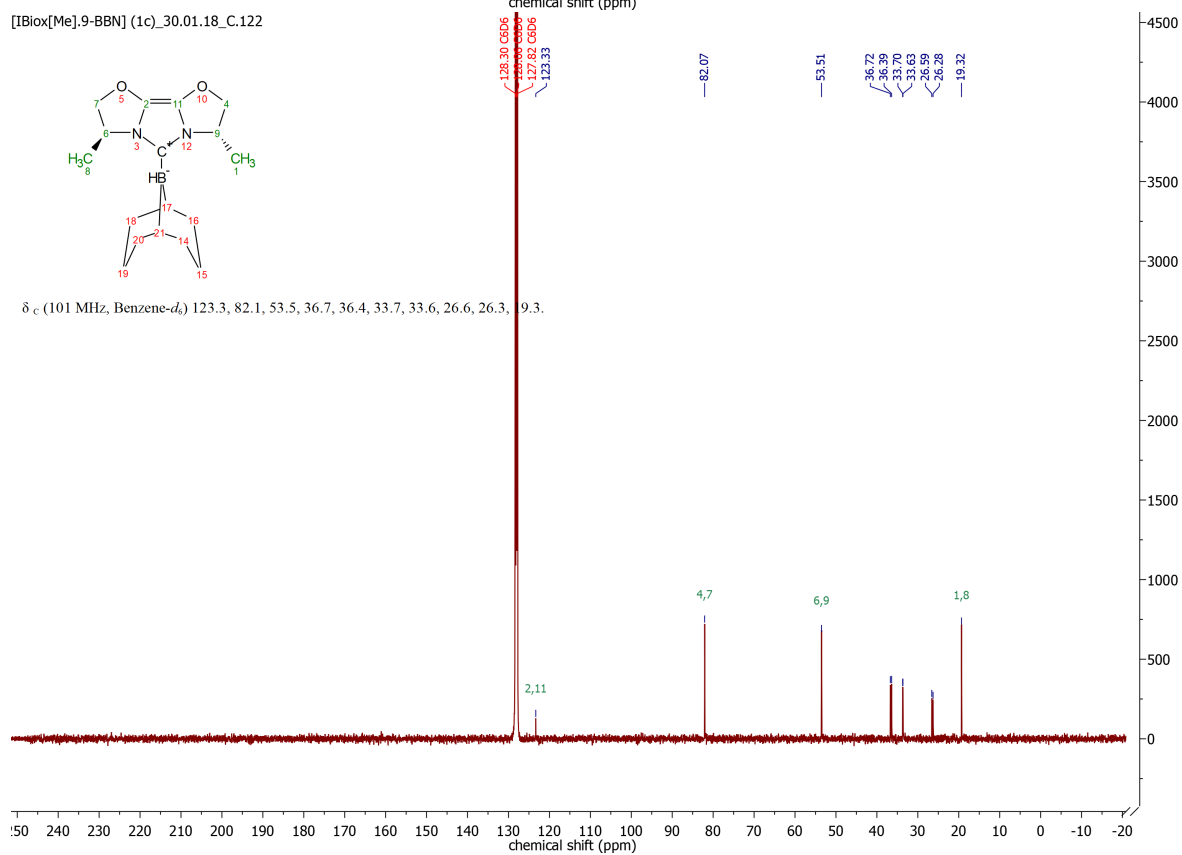

[Biox[Me]<sub>2</sub>9-BBN] (1c)\_30.01.18\_C.121

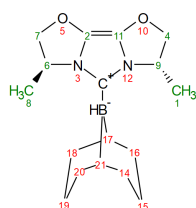

$\delta_B$  (128 MHz, Benzene-*d*<sub>6</sub>) -16.79 (d, *J* 83.0).

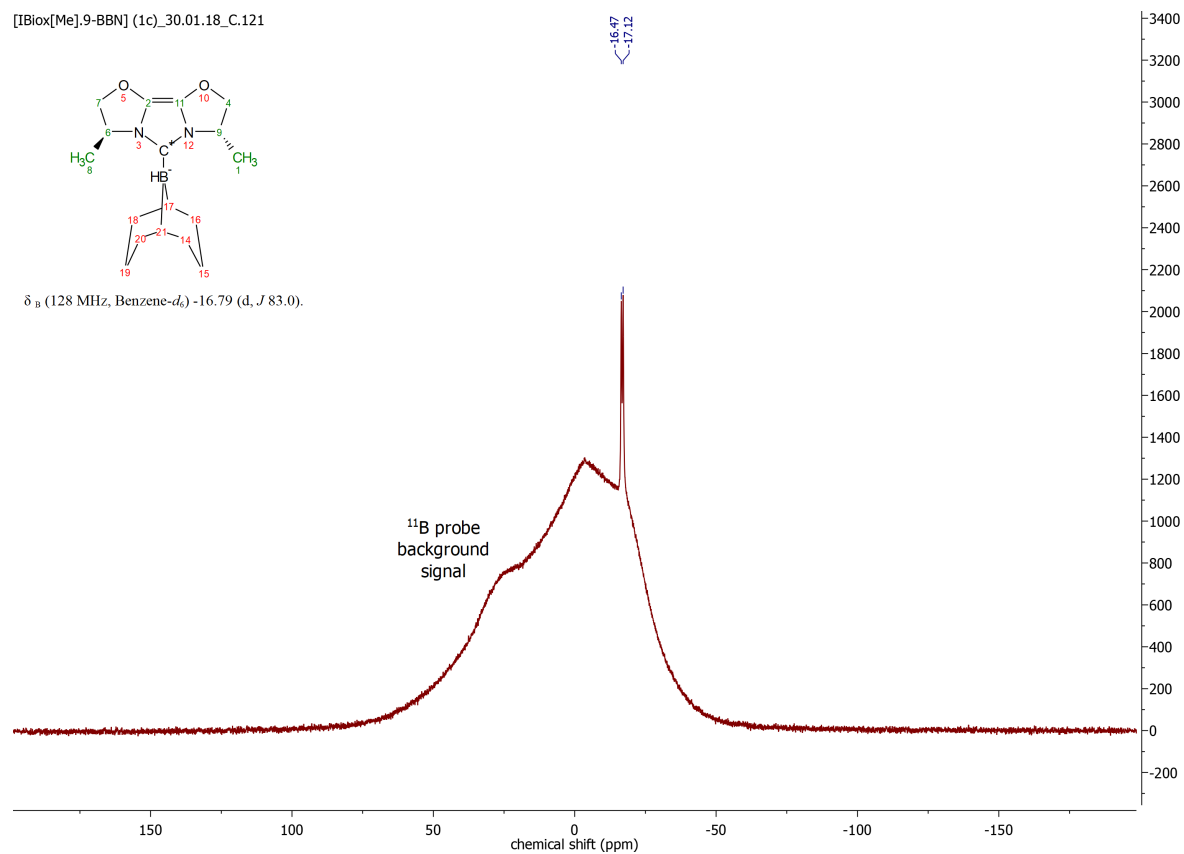

### 3. Substrate preparation and copies of NMR spectra

Example (modified literature procedure):<sup>4-6</sup>

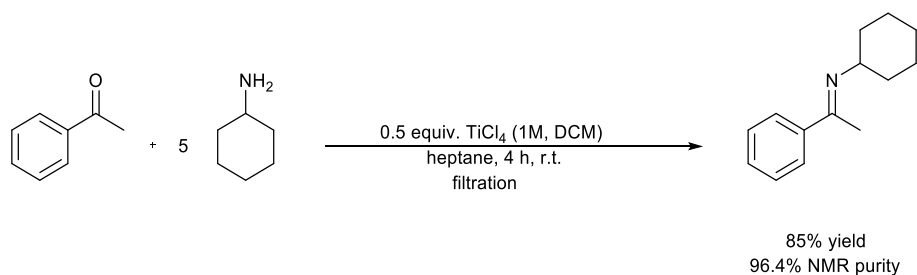

**Scheme S2.** *N*-alkyl ketimine synthesis

General procedure: To a stirred solution of acetophenone (3.5 mL, 30 mmol, 1 equiv.) in pentane (500 mL) was added the amine component (150 mmol, 5 equiv., opalescence develops) followed by  $\text{TiCl}_4$  (1.65 mL, 15 mmol, 0.5 equiv.). A coloured voluminous precipitate develops. Stirring was continued at room temperature, during which time the colour of the precipitate changes to white. Aliquots were collected for NMR analysis. The reaction was filtered and the volatiles removed under low or high vacuum. The resulting oils were stored over activated 3 or 4 Å MS.

For substrates **4b** and **4h**, reaction was performed with auxiliary base  $\text{Et}_3\text{N}$  (4 equiv.) and the resulting products were dried under high vacuum, with heating if required.

For reaction development substrates **4a**, **4c**, **4d** were distilled, **4b** was distilled and recrystallised from pentane. We observed similar reactivity for purified and un-purified materials and therefore other substrates were used as prepared for carrying out substrate scope investigation.

Substrate **4a** was prepared according to a literature procedure.<sup>7</sup>

| Ketimine  | Time  | Yield | Appearance                   |
|-----------|-------|-------|------------------------------|
| <b>4b</b> | 27 h  | 67%   | Orange solid                 |
| <b>4c</b> | 1.5 h | 86%   | Pale yellow clear oil        |
| <b>4d</b> | 3 h   | 97%   | Colourless clear oil         |
| <b>4e</b> | 5 h   | 87%   | Pale yellow clear oil        |
| <b>4f</b> | 6 h   | 87%   | White crystalline solid      |
| <b>4g</b> | 1.5 h | 93%   | Pale yellow clear oil        |
| <b>4h</b> | 72 h  | 70%   | Orange solid                 |
| <b>4i</b> | 4 h   | 79%   | Colourless viscous clear oil |

**Table S3.** Ketimine preparation

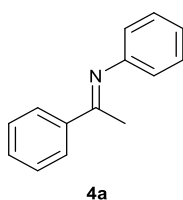

$^1\text{H}$  NMR (400 MHz,  $\text{CD}_2\text{Cl}_2$ ) 8.01 (m, 2H), 7.48 (m, 3H), 7.39 (m, 2H), 7.11 (m, 1H), 6.81 (m, 2H), 2.24 (s, 3H), in agreement with literature data;<sup>8</sup>  $^{13}\text{C}$  NMR (100 MHz,  $\text{CD}_2\text{Cl}_2$ ) 165.7, 152.5, 140.1, 131, 129.5, 128.8, 127.7, 123.6, 119.8, 17.6.

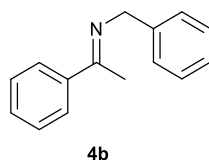

b.p. 160-170 °C, 0.016 mbar; white crystalline solid; E/Z ratio = 20:1  $^1\text{H}$  NMR (400 MHz,  $\text{CDCl}_3$ ) 7.92 (m, 2H), 7.51-7.19 (m, 8H), 4.79 (s, 2H), 2.38 (m, 3H);  $^{13}\text{C}$  NMR (100 MHz,  $\text{CDCl}_3$ ) 166.1, 141.2, 140.7, 129.7, 128.5, 128.3, 127.8, 126.9, 126.7, 55.8, 16. In agreement with literature data.<sup>9</sup> HRMS (ES<sup>+</sup>) calculated for  $\text{C}_{15}\text{H}_{16}\text{N}$  ( $[\text{M}+\text{H}]^+$ ) 210.1283, found 210.1290; IR (powder,  $\text{cm}^{-1}$ ) 3081, 3056, 3022, 2856, 1629, 1491, 1446, 1375, 1348, 1300, 1282, 1267, 1044, 1025, 756, 724, 693, 686, 570.



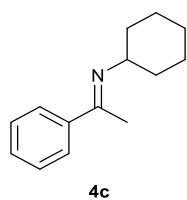

b.p. 130 °C, <5 mbar; E/Z ratio = 20:1;  $^1\text{H}$  NMR (400 MHz,  $\text{CDCl}_3$ ) 7.75 (m, 2H), 7.36 (m, 3H), 3.48 (m, 1H), 2.24 (s, 3H), 1.83 (m, 2H), 1.69 (m, 3H), 1.56 (m, 3H), 1.35 (m, 3H); minor isomer 7.39 (m), 7.1 (m, 2H), 3.05 (m, 1H), 2.26 (s) 1.12 (m);  $^{13}\text{C}$  NMR (100 MHz,  $\text{CDCl}_3$ ) major isomer 162.5, 142.1, 129.2, 128.3, 126.8, 60, 33.7, 25.9, 25, 15.4; minor isomer 166.3, 139.8, 128.5, 127.9, 125.8, 60.9, 34.1, 29.5, 25.7, 24.7. HRMS (ES+) calculated for  $\text{C}_{14}\text{H}_{20}\text{N}$  ( $[\text{M}+\text{H}]^+$ ) 202.1596, found 202.1591; IR (neat,  $\text{cm}^{-1}$ ) 2923, 2851, 1631, 1444, 1279, 1025, 759, 691, 573.

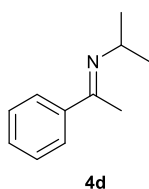

b.p. 65 °C, <5 mbar, E/Z ratio = 7.7: 1;  $^1\text{H}$  NMR (400 MHz,  $\text{CDCl}_3$ ) major isomer 7.74 (m, 2H), 7.35 (m, 3H), 3.84 (septet,  $J = 6.1$  Hz, 1H), 2.23 (s, 3H), 1.22 (d,  $J = 6.1$  Hz, 6H) minor isomer 7.39 (m), 7.1 (m, 2H), 3.41 (septet,  $J = 6.2$  Hz, 1H), 2.25 (s), 1.07 (d,  $J = 6.2$  Hz, 6H);  $^{13}\text{C}$  NMR (100 MHz,  $\text{CDCl}_3$ ) major isomer 162.42, 142.1, 129.2, 128.3, 126.8, 51.3, 23.7, 15.3; minor isomer 166.2, 139.9, 128.6, 128, 125.9, 52.3, 29.5, 24. HRMS (ES+) calculated for  $\text{C}_{11}\text{H}_{16}\text{N}$  ( $[\text{M}+\text{H}]^+$ ) 162.1283, found 162.1278; IR (neat,  $\text{cm}^{-1}$ ) 2964, 2927, 2866, 1631, 1376, 1444, 1359, 1276, 1025, 759, 691, 574.

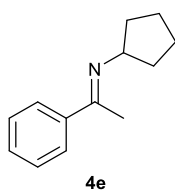

E/Z ratio = 16.7: 1;  $^1\text{H}$  NMR (400 MHz,  $\text{CDCl}_3$ ) 7.77 (m, 2H), 7.37 (m, 3H), 4.04 (m, 1H), 2.26 (s, 3H), 1.91 (m, 4H), 1.66 (m, 4H);  $^{13}\text{C}$  NMR (100 MHz,  $\text{CDCl}_3$ ) major isomer 163, 141.9, 129.2, 128.3, 126.7, 61.9, 34.3, 24.9, 15.9; HRMS (ES+) calculated for  $\text{C}_{13}\text{H}_{18}\text{N}$  ( $[\text{M}+\text{H}]^+$ ) 188.1439, found 188.1444; IR (neat,  $\text{cm}^{-1}$ ) 2950, 2865, 1629, 1444, 1275, 1026, 759, 691, 571.

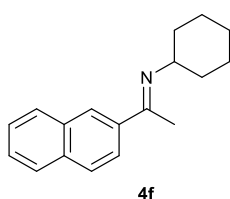

white crystalline solid, m.p. (pentane) 80.5-82.5 °C; E/Z ratio = 12.5: 1;  $^1\text{H}$  NMR (400 MHz,  $\text{CDCl}_3$ ) 8.16 (m, 1H), 8.06 (m, 1H), 7.87 (m, 3H), 7.5 (2H, m), 3.58 (m, 1H), 2.37 (s, 3H), 1.94-1.29 (m, 11H);  $^{13}\text{C}$  NMR (100 MHz,  $\text{CDCl}_3$ ) major isomer 162.2, 139.3, 134, 133.2, 128.8, 127.8, 127.7, 126.5, 126.4, 126.1, 124.5, 60.2, 33.8, 26, 25, 15.3; minor isomer 166.4, 137.3, 132.8, 128.3, 128.2, 126.6, 124.8, 124.1, 61.1, 34.1, 29.7, 25.6, 24.7; IR (powder) 3053, 2915, 2850, 1619, 1446, 1359, 1286, 1127, 952, 892, 861, 836; HRMS (ES+) calculated for  $\text{C}_{18}\text{H}_{22}\text{N}$  ( $[\text{M}+\text{H}]^+$ ) 252.1752, found 252.1763.

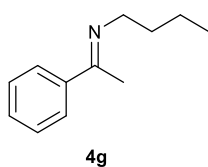

E/Z ratio = 18.2:1,  $^1\text{H}$  NMR (400 MHz,  $\text{CDCl}_3$ ) 7.77 (m, 2H), 7.38 (m, 3H), 3.49 (t,  $J$  = 7.1 Hz, 2H), 2.24 (s, 3H), 1.75 (m, 2H), 1.48 (m, 2H), 0.99 (t,  $J$  = 7.1 Hz, 3H);  $^{13}\text{C}$  NMR (100 MHz,  $\text{CDCl}_3$ ) 164.8, 141.6, 129.3, 128.3, 126.6, 52.1, 33.2, 20.9, 15.5, 14.2; In agreement with literature data.<sup>4</sup> HRMS (ES+) calculated for  $\text{C}_{12}\text{H}_{18}\text{N}$  ( $[\text{M}+\text{H}]^+$ ) 176.1439, found 176.1432; IR (neat,  $\text{cm}^{-1}$ ) 2926, 2954, 2869, 1362, 1444, 1280, 1027, 759, 691, 571.

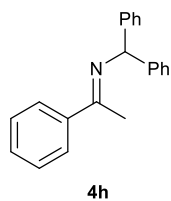

E/Z ratio = 12.5:1;  $^1\text{H}$  NMR (400 MHz,  $\text{CDCl}_3$ ) 7.95 (m, 2H), 7.47 (m, 4H), 7.39 (m, 3H), 7.3 (m, 4H), 7.21 (m, 3H), 5.87 (s, 1H), 2.31 (s, 3H);  $^{13}\text{C}$  NMR (100 MHz,  $\text{CDCl}_3$ ) 164.5, 145, 141.3, 129.8, 128.5, 128.3, 127.7, 127.1, 126.8, 68.5, 16.1. HRMS (ES+) calculated for  $\text{C}_{21}\text{H}_{20}\text{N}$  ( $[\text{M}+\text{H}]^+$ ) 286.1596, found 286.1594; IR (powder,  $\text{cm}^{-1}$ ) 3081, 3055, 3023, 2872, 1635, 1597, 1577, 1489, 1445, 1368, 1283, 1265, 1047, 1021, 760, 738, 690, 613, 575, 561.

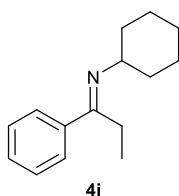

E/Z ratio = 1.8:1; ~88% purity;  $^1\text{H}$  NMR (400 MHz,  $\text{CDCl}_3$ ) major 7.72 (m, 2H), 7.36 (m), 3.53 (m, 1H), 2.7 (q,  $J = 7.7$  Hz, 2H), 1.87-1.28 (m), 1.09 (t,  $J = 7.6$  Hz, 3H); minor 7.36 (m), 7.06 (m), 3.02 (m), 2.51 (q,  $J = 7.6$  Hz), 1.87-1.28 (m), 1.04 (t,  $J = 7.4$  Hz);  $^{13}\text{C}$  NMR (100 MHz,  $\text{CDCl}_3$ ) 170.9, 167.8, 140.8, 139.1, 129.1, 128.4, 128.3, 127.1, 126.4, 60.7, 59.6, 34.22, 34.1, 25.9, 25.7, 25, 24.7, 22.1, 12.7, 11.4; HRMS (ES+) calculated for  $\text{C}_{15}\text{H}_{22}\text{N}$  ( $[\text{M}+\text{H}]^+$ ) 216.1752, found 216.1753; IR (neat,  $\text{cm}^{-1}$ ) 2924, 2851, 1689, 1628, 1444, 1219, 962, 889, 770, 744, 692.

May22-2016.30.1.1r  
DM PhCMeNPh

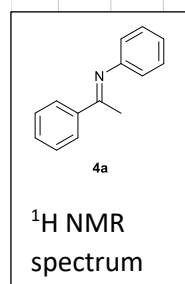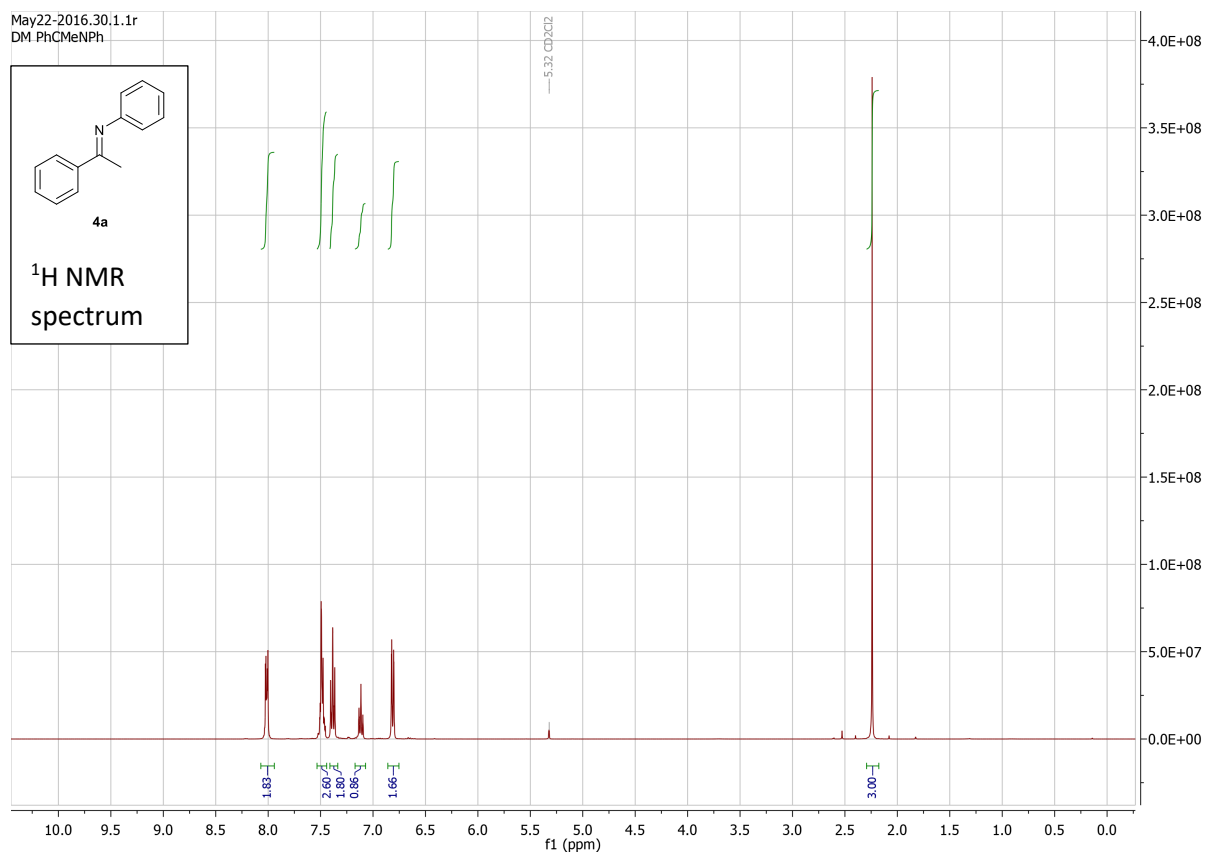

May22-2016.31.1.1r  
DM PhCMeNPh

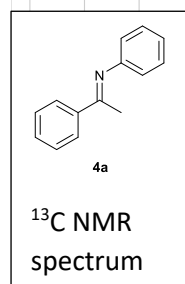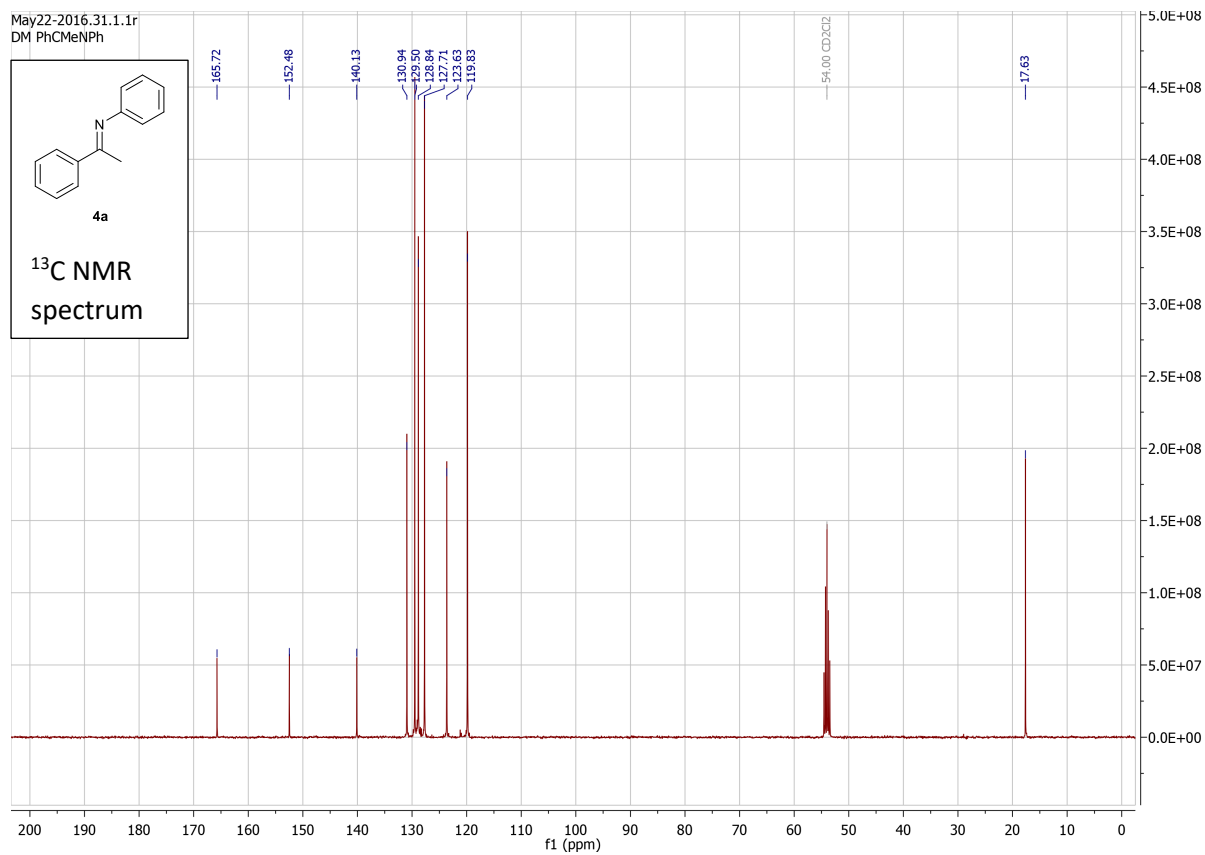

recrystallised from pentane.30.1.1r  
DM PhCMeNBn

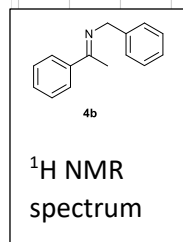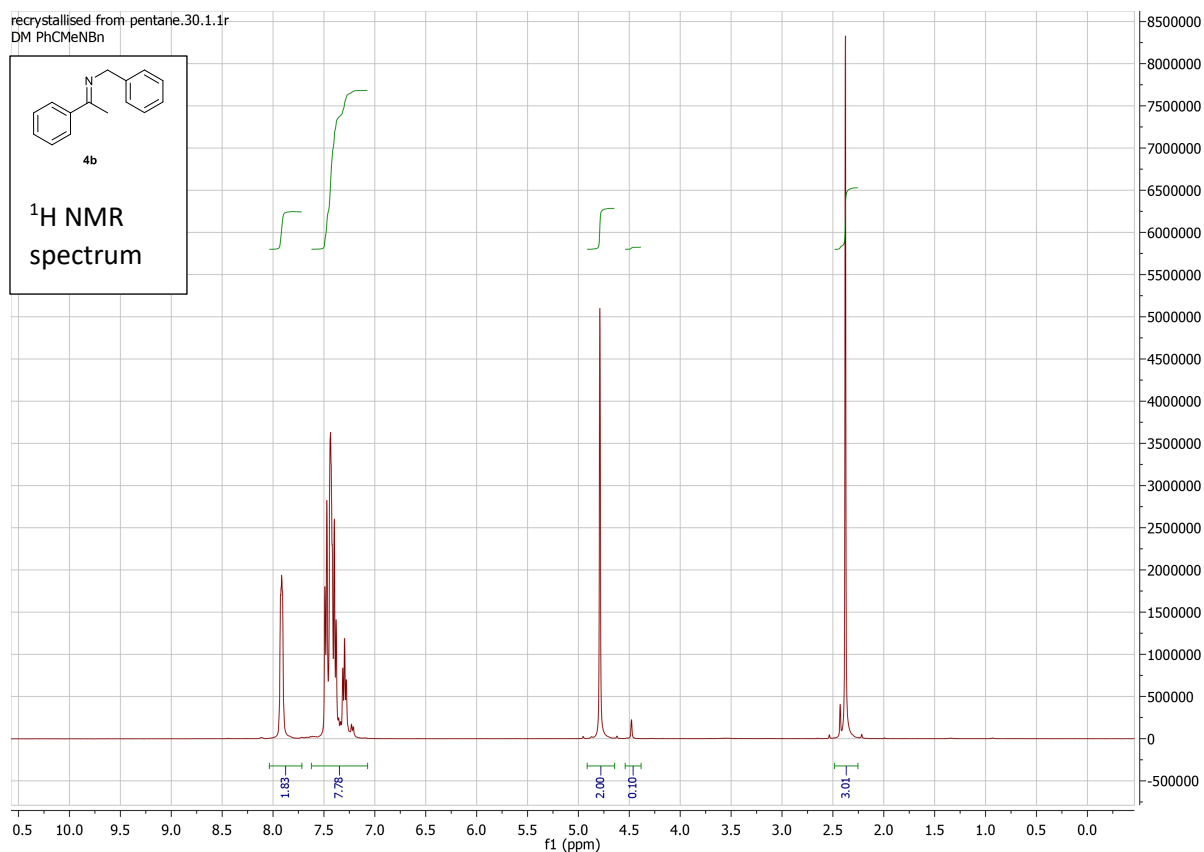

recrystallised from pentane.31.1.1r  
DM PhCMeNBn

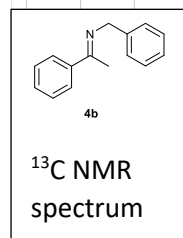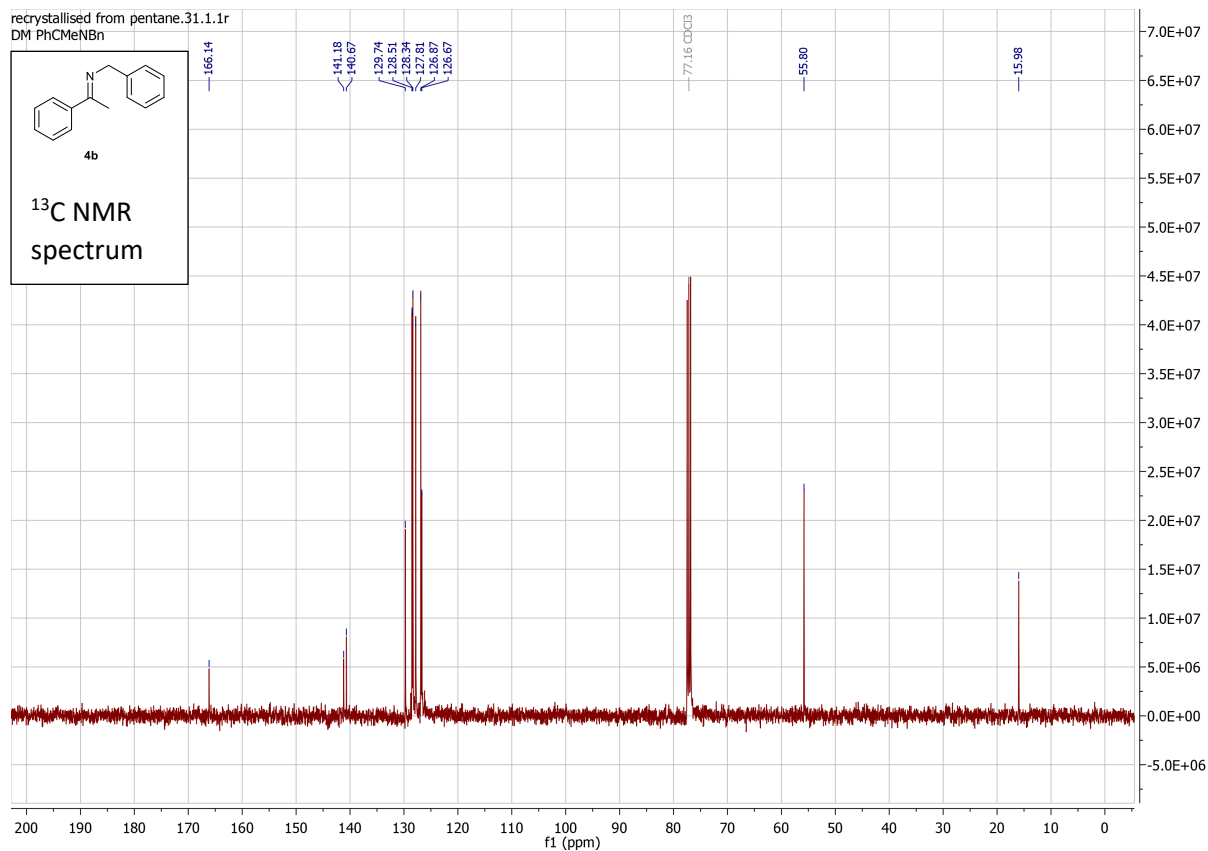

May17-2018.20.1.1r  
DM3-417 in cdd3

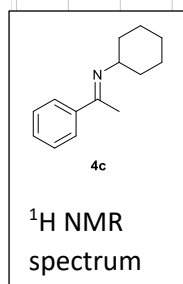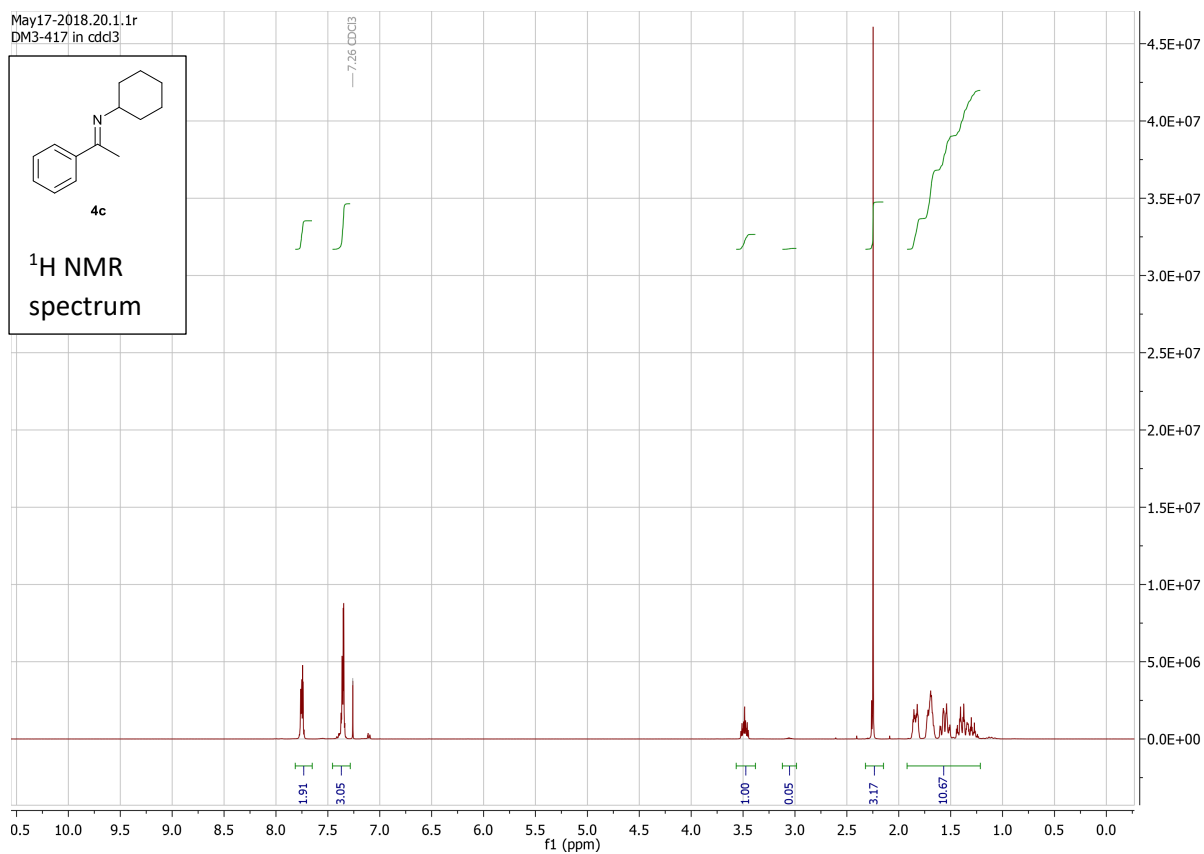

180212032.11.1.1r  
Dan Mercea/DM4-378 check

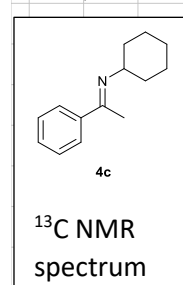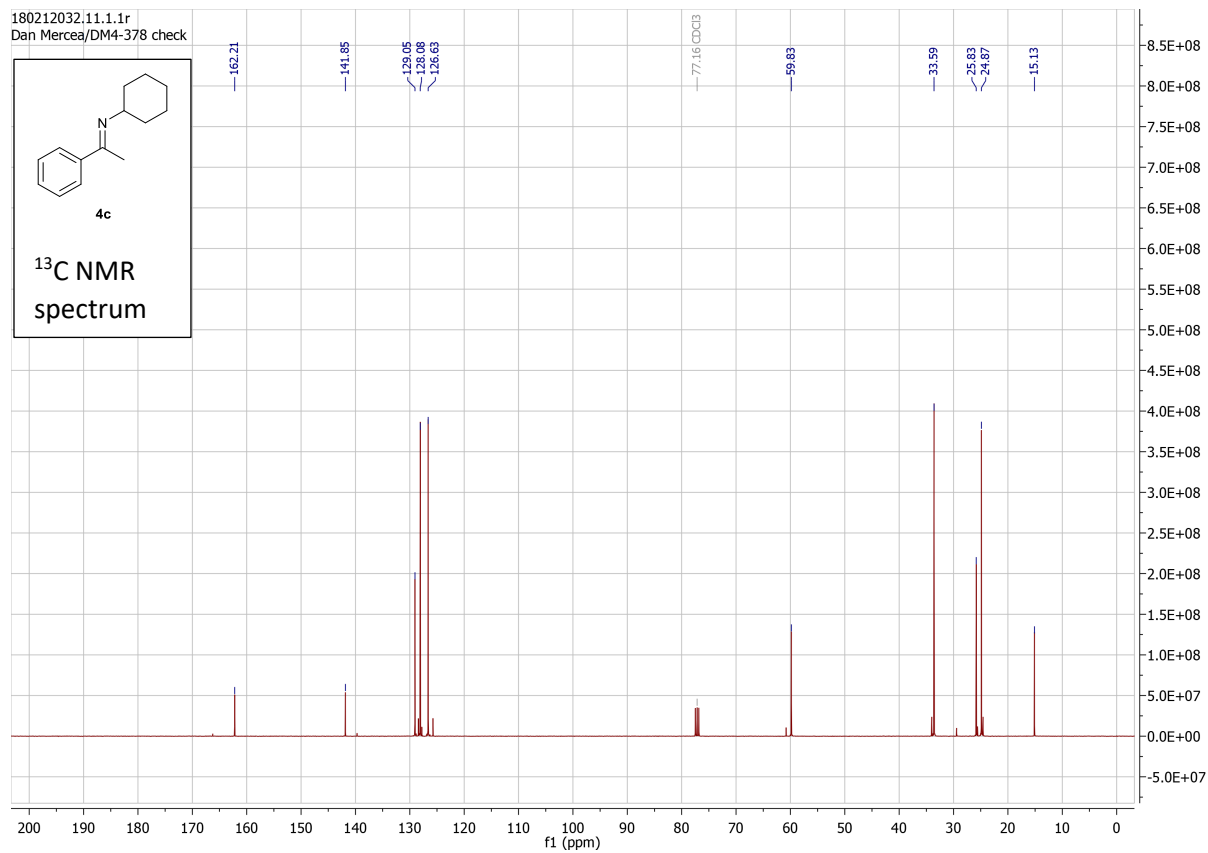

180205032.10.1.1r  
Dan Mercea/DM4-383 distilled

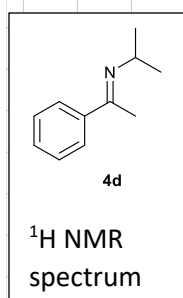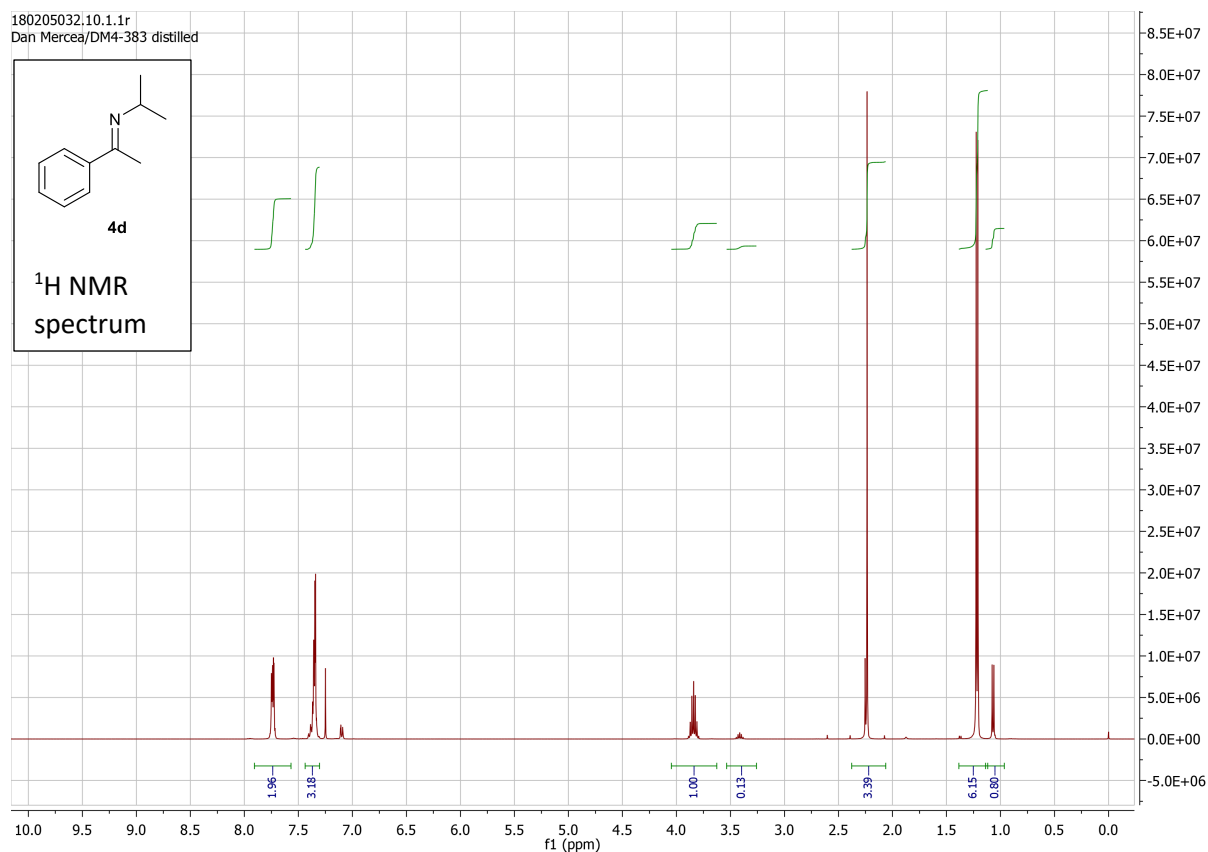

180205032.11.1.1r  
Dan Mercea/DM4-383 distilled

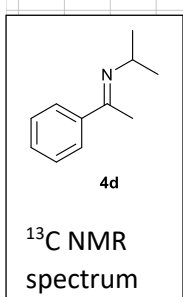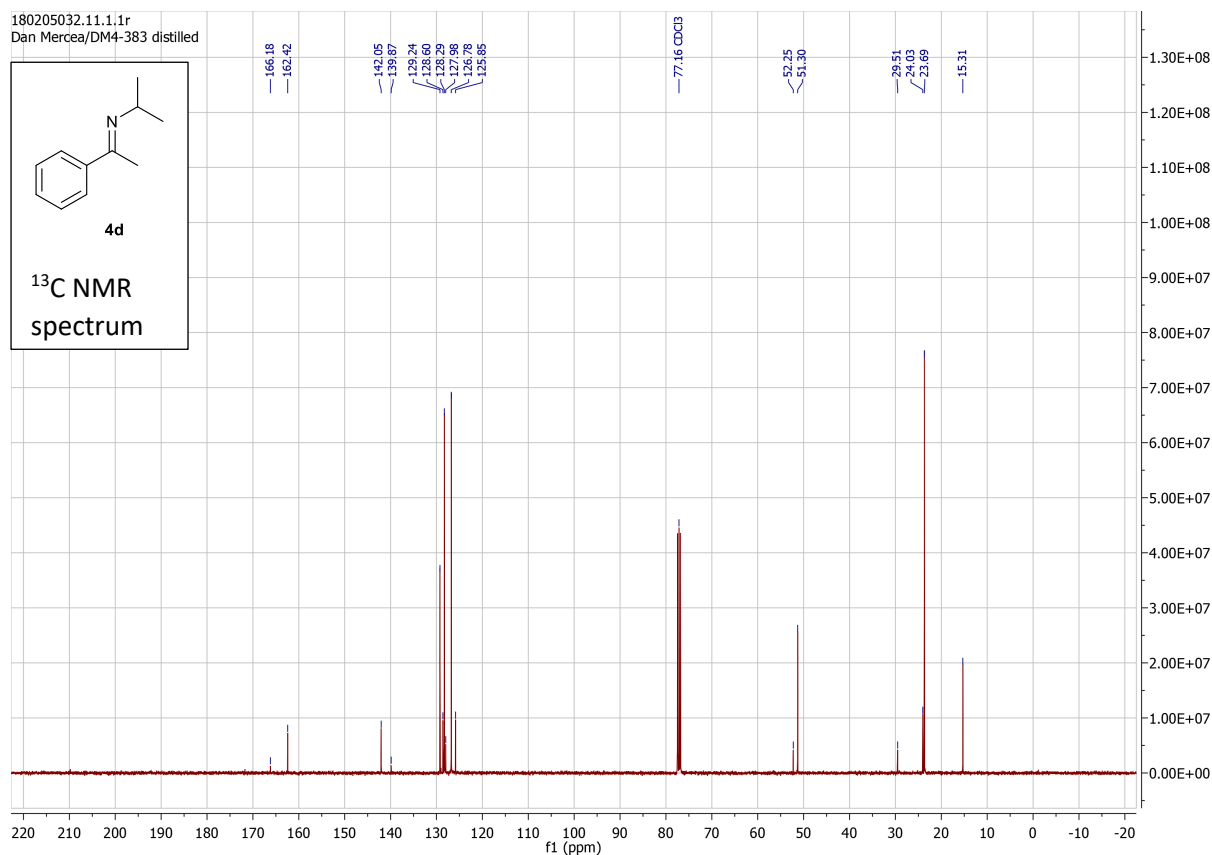

Jul18-2018.90.1.1r  
DM3-441 in CDCl3

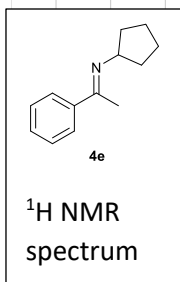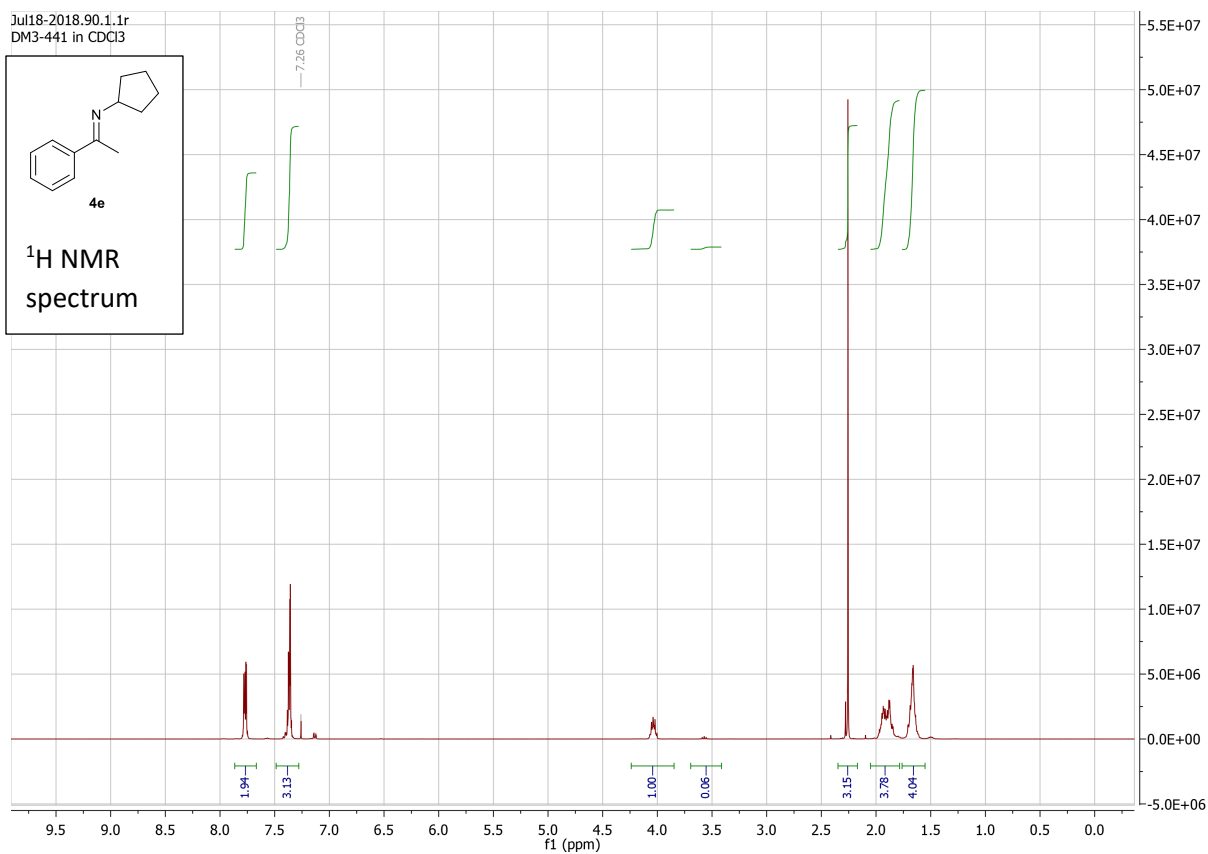

Jul18-2018.91.1.1r  
DM3-441 in CDCl3

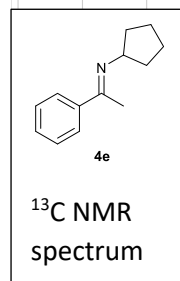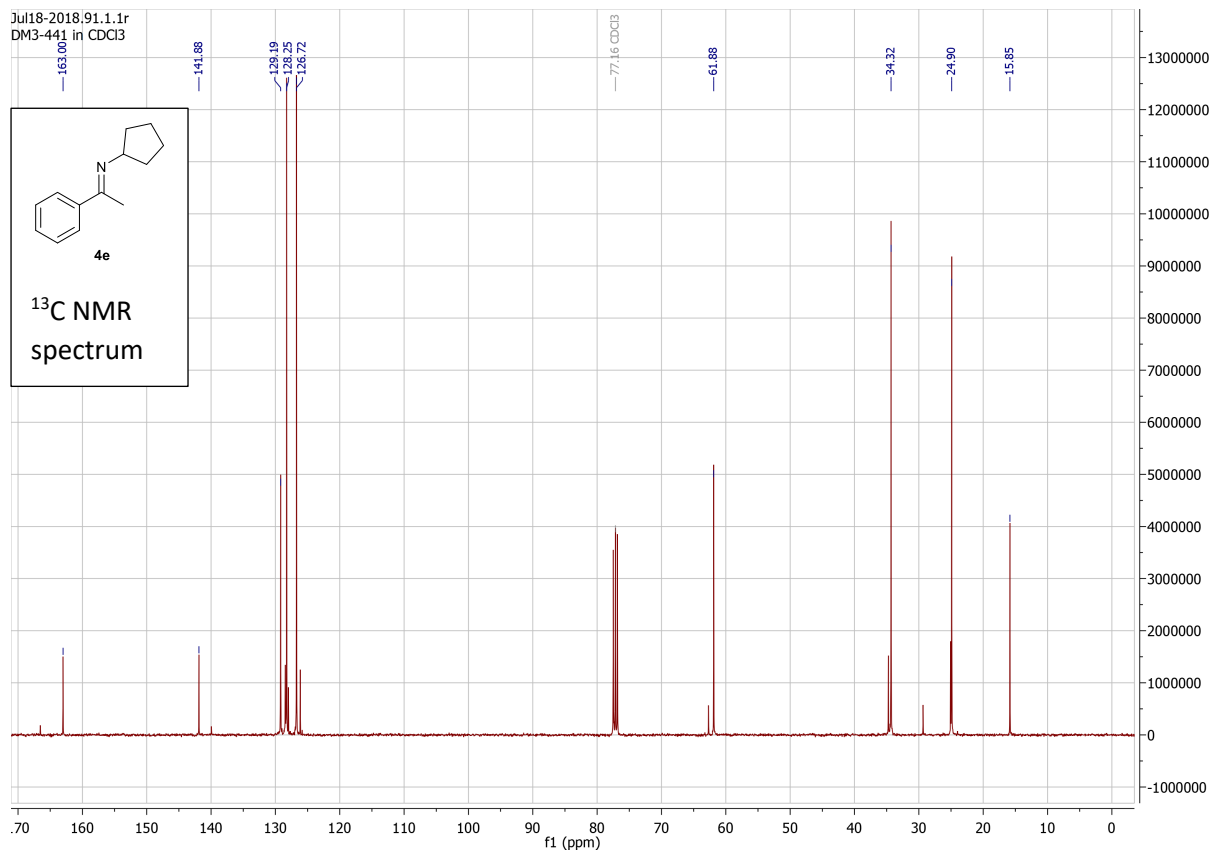



Jan09-2019.20.1.1r  
DM5-496

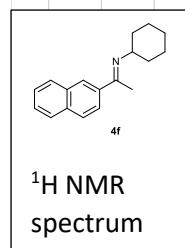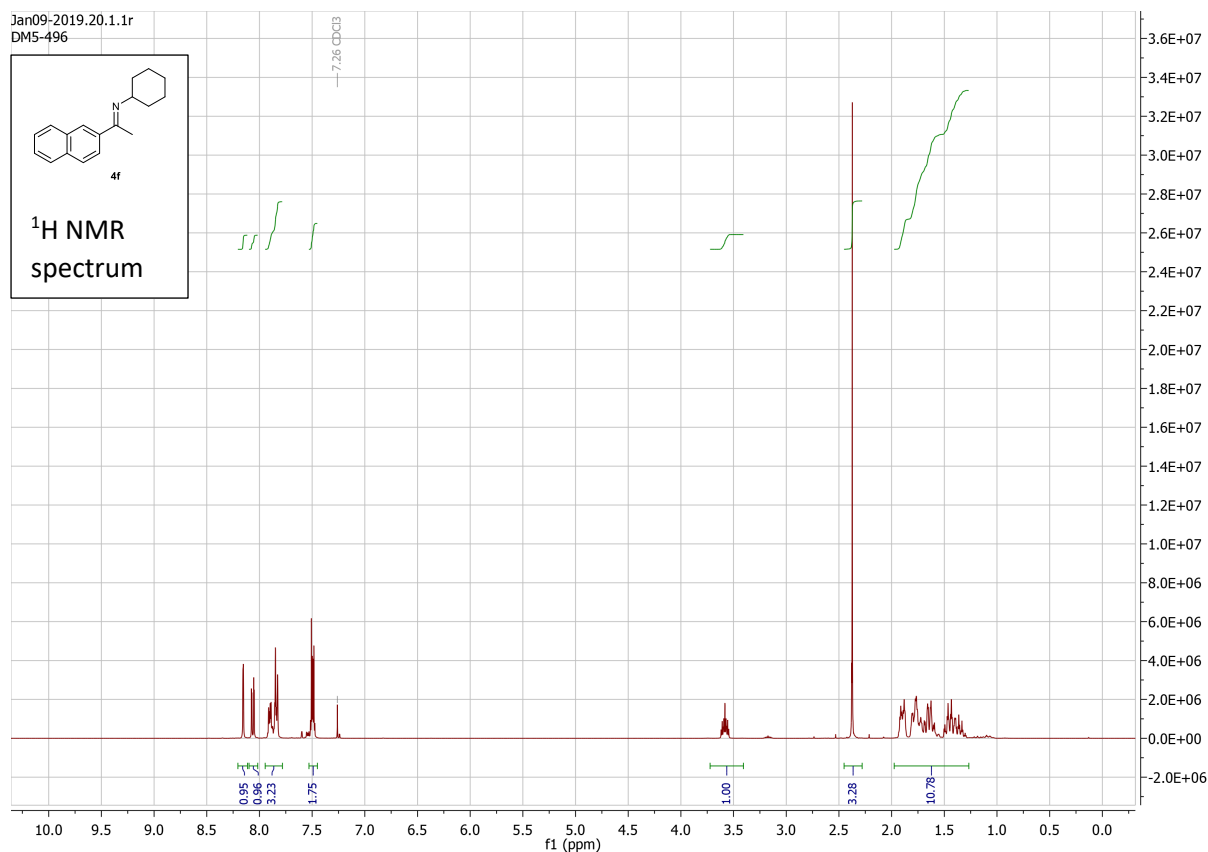

Jan09-2019.21.1.1r  
DM5-496

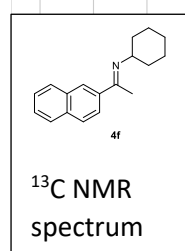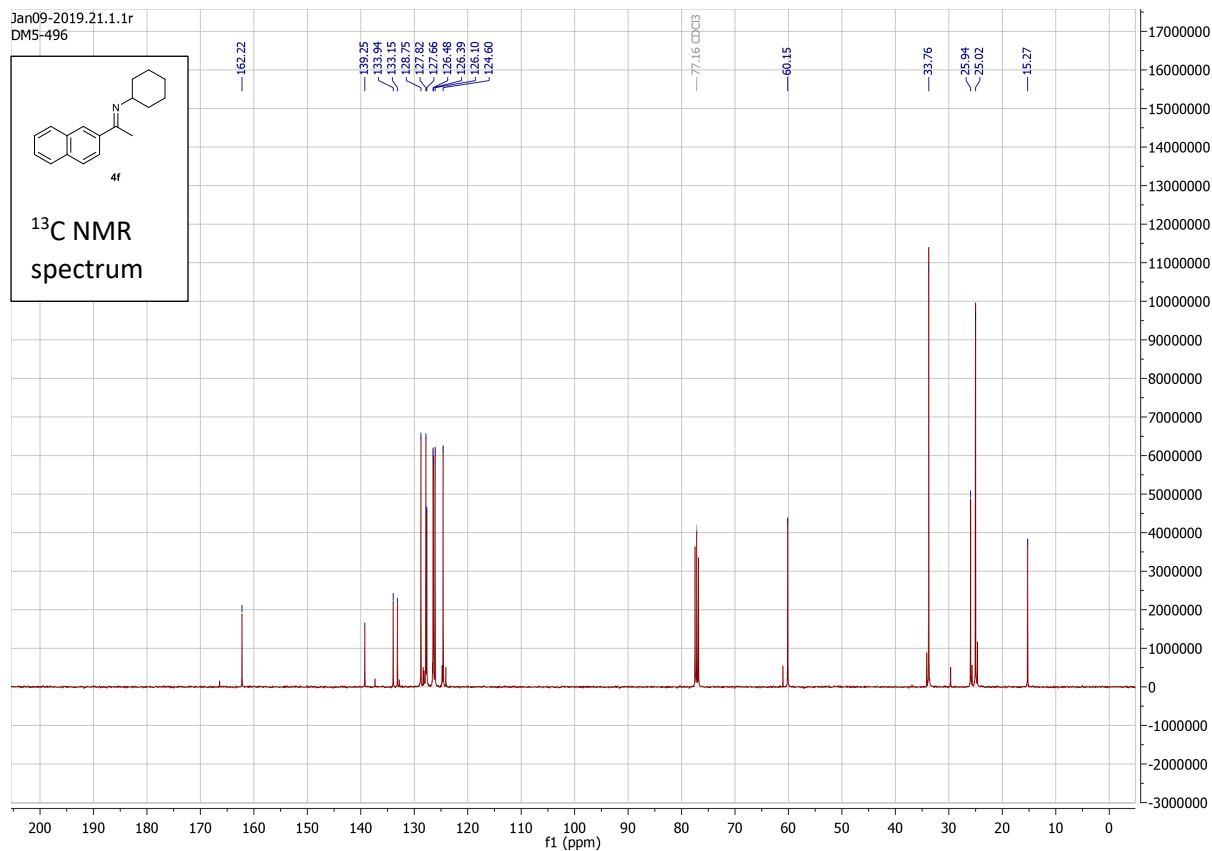

Jul18-2018.80.1.1r  
DM3-437 in CDCl3

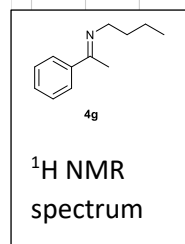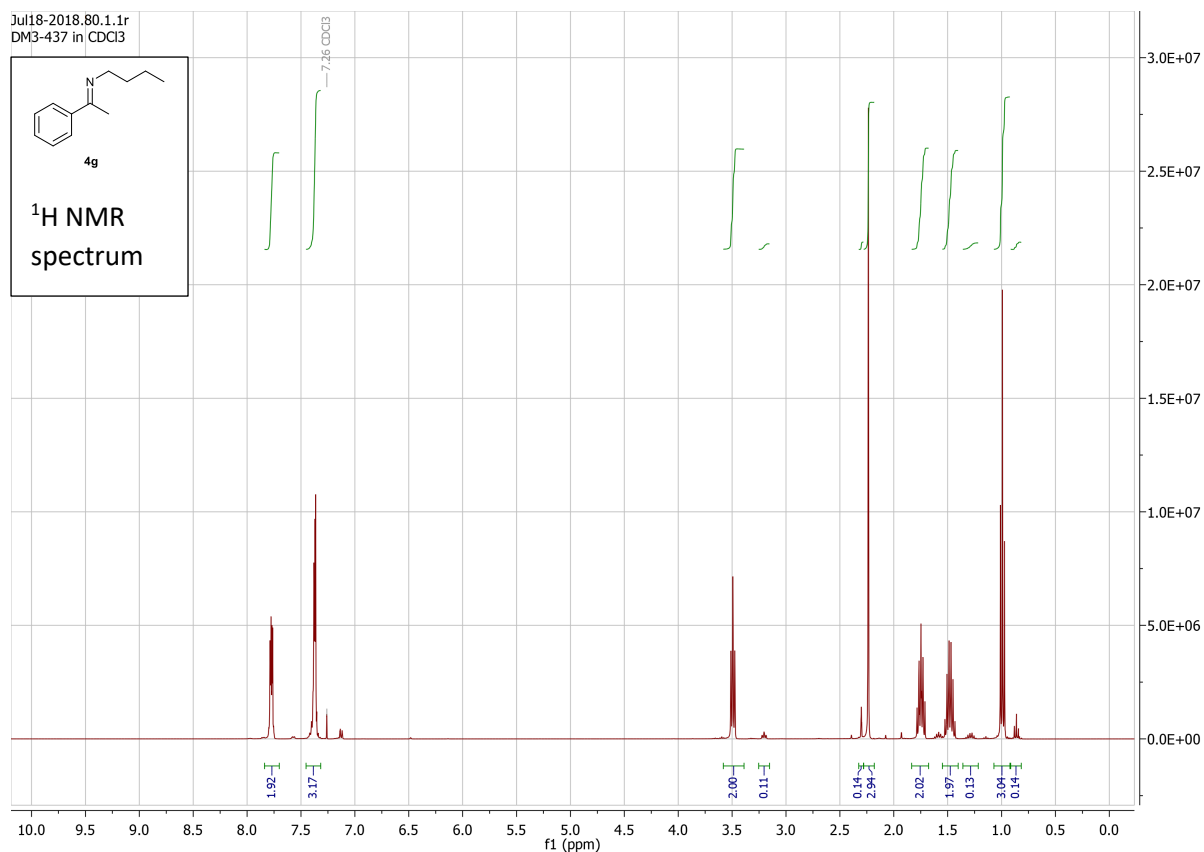

Jul18-2018.81.1.1r  
DM3-437 in CDCl3

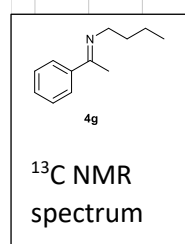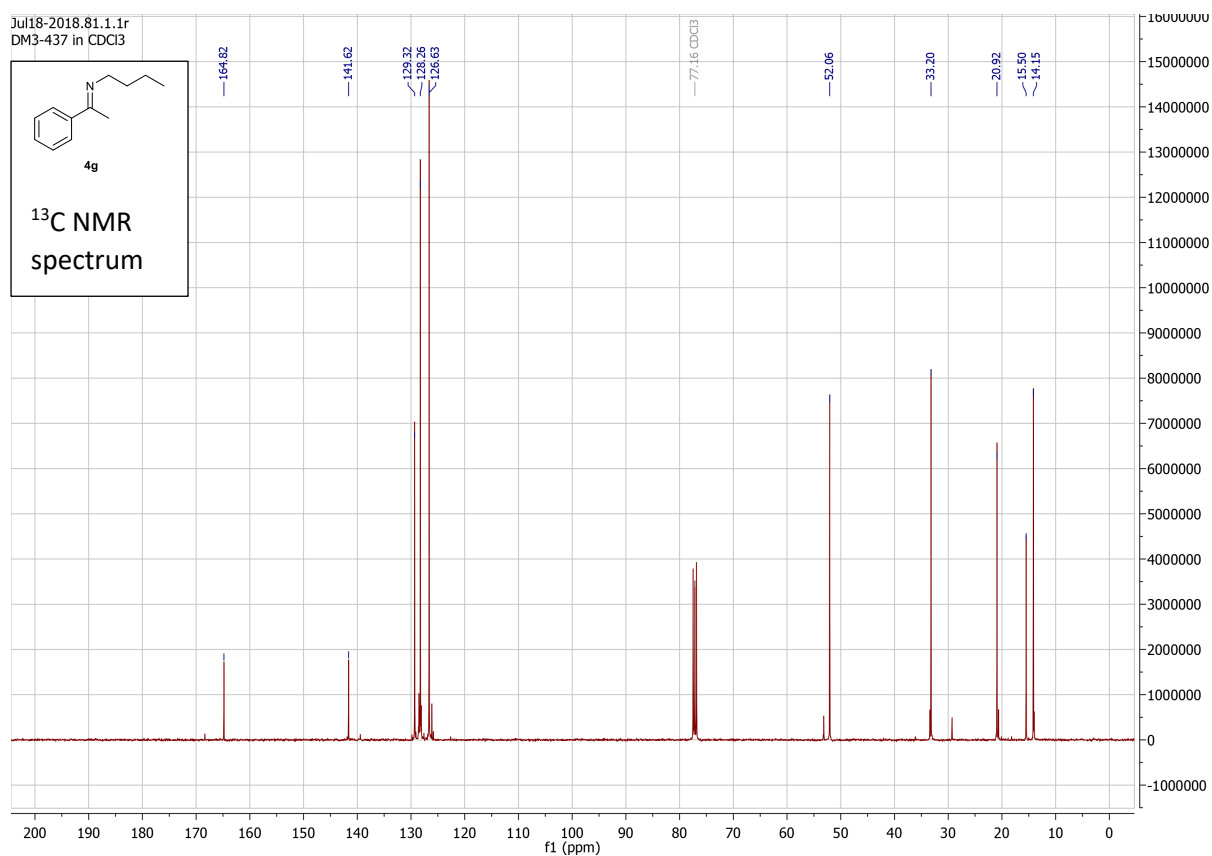

Jun18-2018.40.1.1r  
DM3-430 hivac at 100C

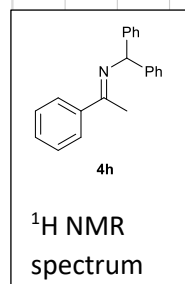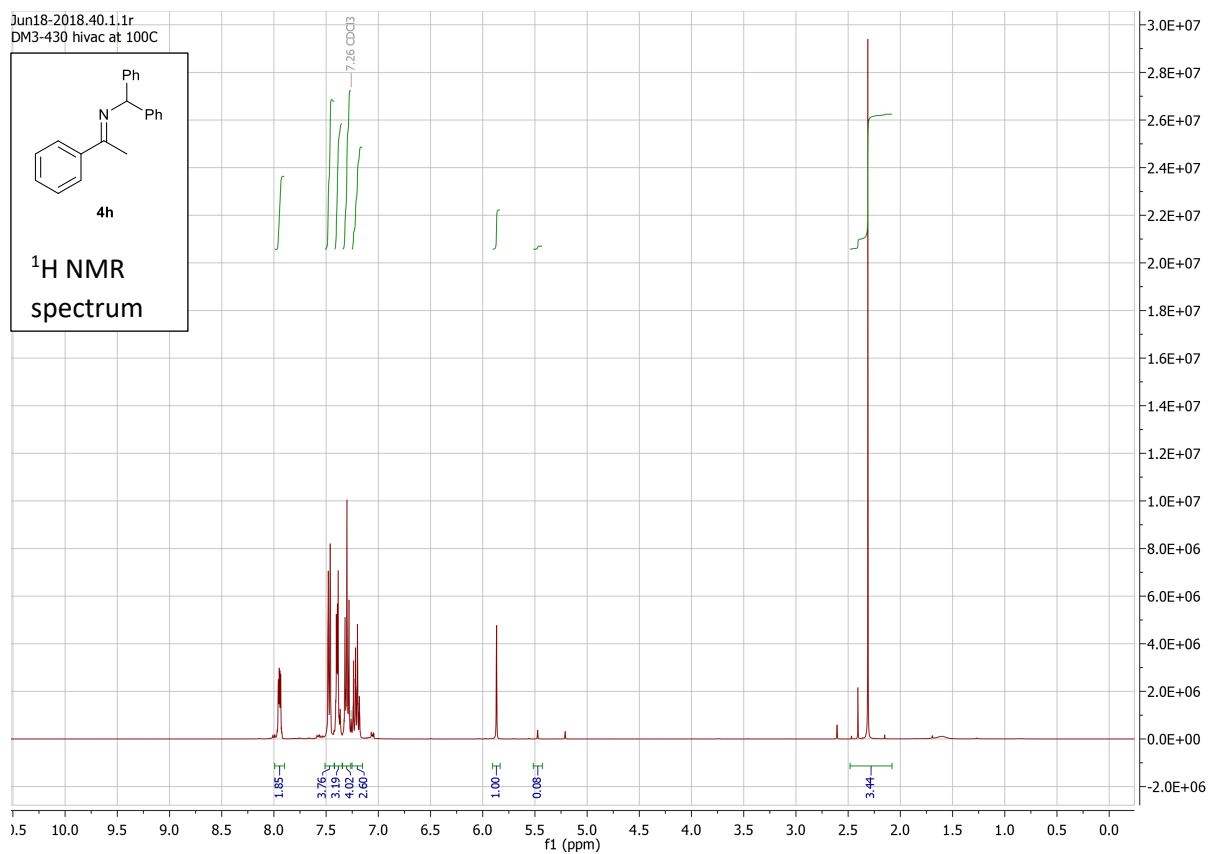

Jul18-2018.71.1.1r  
DM3-430 in CDCl3

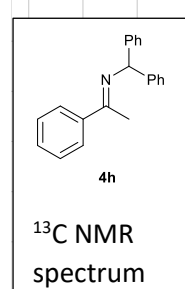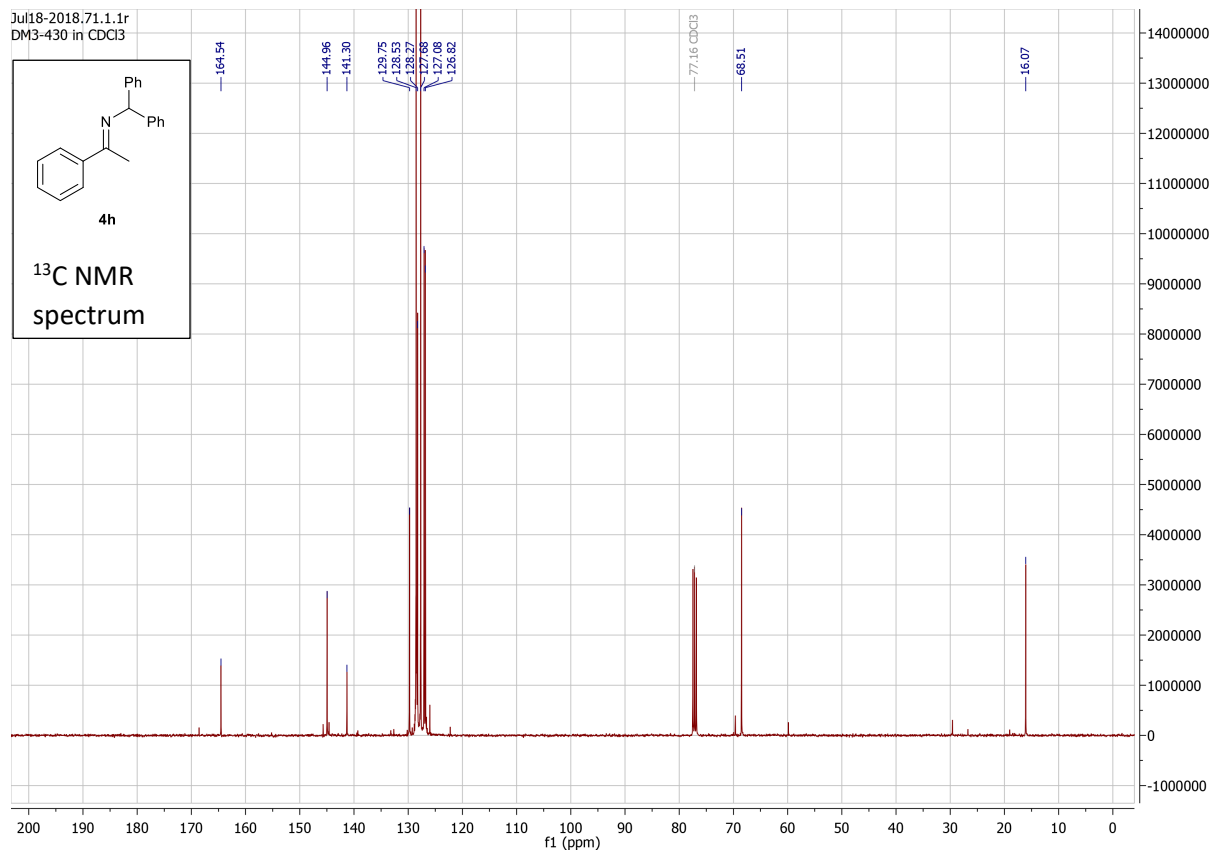

Jul18-2018.100.1.1r  
DM3-445 in CDCl3

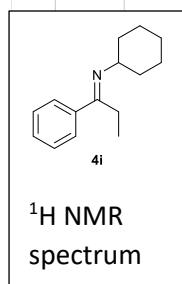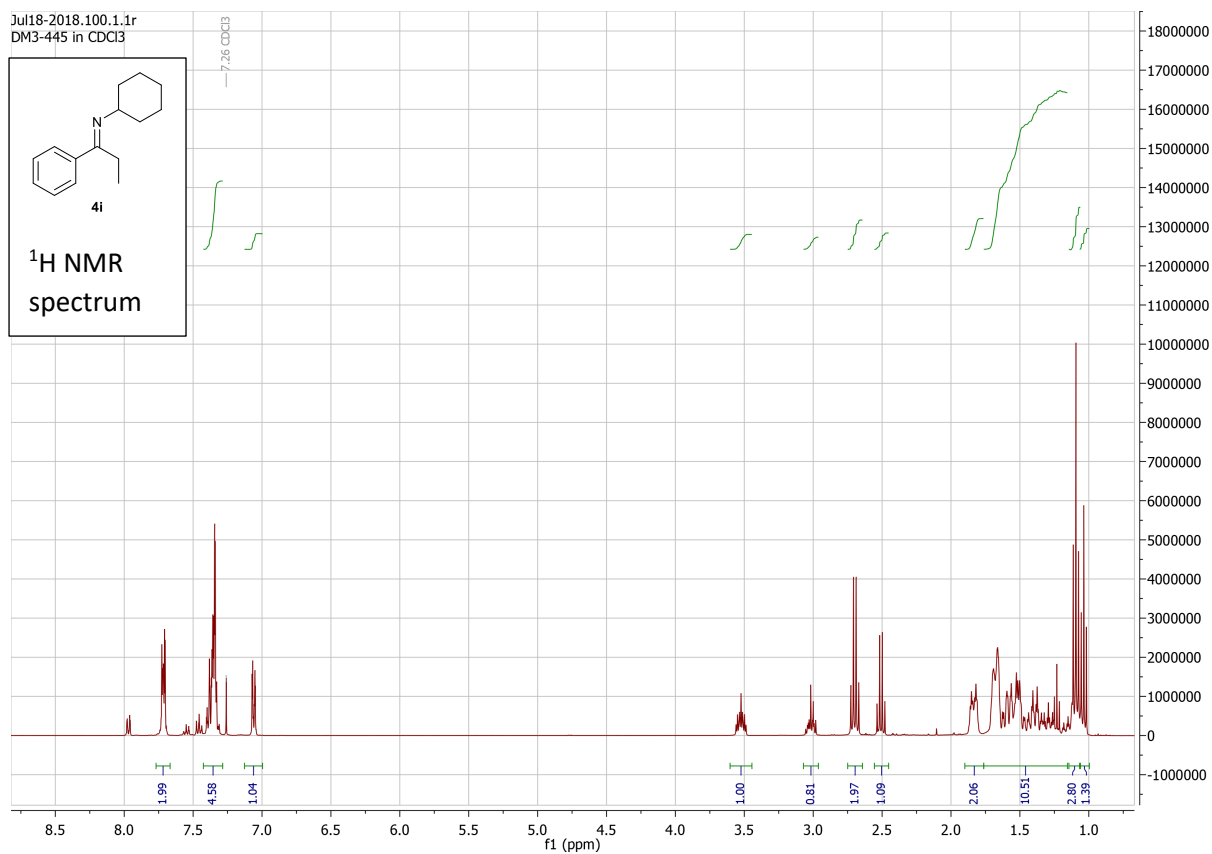

Jul18-2018.101.1.1r  
DM3-445 in CDCl3

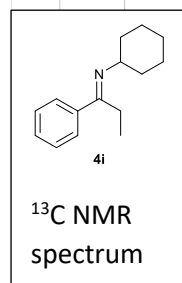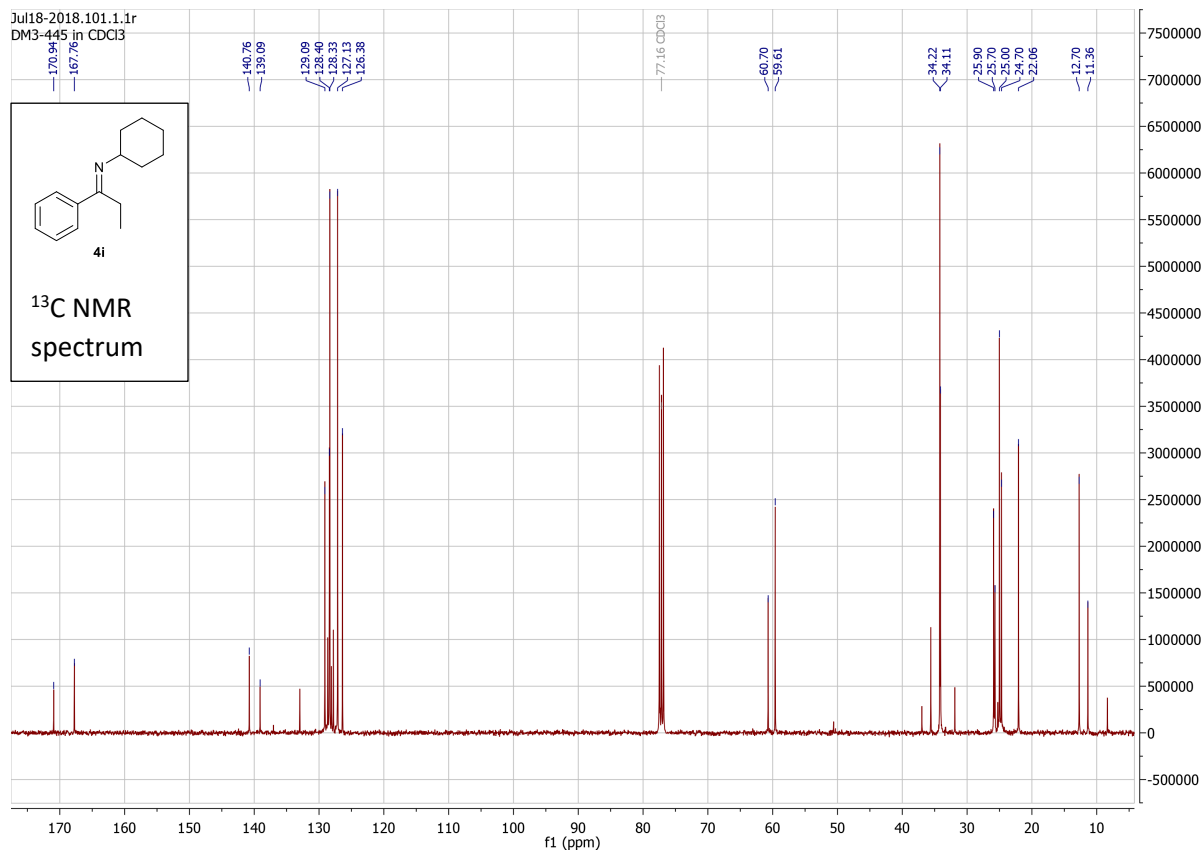

## 4. Hydrosilylation catalysis

Reactions were carried out either in NMR tubes equipped with Young's valves (method A) or in glass vials (method B). Workup with methanol was carried out to generate the free amines **5** from the *N*-silylamines **9**.

**Method A:** A sealed glass capillary insert (0.1M 1,3,5-trimethoxybenzene/ $C_6D_6$ , calibrated against a solution of 1,4-dinitrobenzene) was included and the reaction initiated by the addition of hydrosilane using a microsyringe, sealing and mixing. The reaction was allowed to proceed at room temperature and analysed by NMR at the specified time points. Results are reported as percentage composition. Mass balance was approximately constant throughout the reaction and in the 90-110% range based on theoretical (for  $PhMe_2SiH$  the concentration adjusted for hydrosilane volume is 0.57M). Workup with methanol was carried out as soon as possible following the last reported time point.

**Method B:** Reactions were set up in an analogous fashion but allowed to proceed in the glovebox before being worked up with methanol. NMR analysis was carried out in  $CDCl_3$  on the crude reaction mixtures; a sealed glass capillary insert (0.1M 1,3,5-trimethoxybenzene/ $C_6D_6$ ) was optionally included.

For both methods purification was carried out through preparative TLC (20x20cm, 0.2mm thickness) or flash column chromatography (10-15 g silicagel).

### 4.1 NMR characterisation for *N*-silylamine **9c**

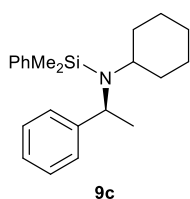

All volatiles were removed under high vacuum. The resulting residue was extracted with  $C_6D_6$ .

NMR analysis was carried out on the resulting solution following filtration.

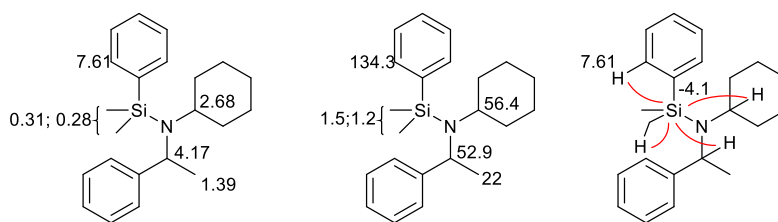

**Figure S4.** NMR assignment for compound **9c**

$^1\text{H}$  NMR (400 MHz,  $\text{C}_6\text{D}_6$ ): 7.61 (m, 2H), 7.37 (m, 2H), 7.18 (m, 5H), 7.05 (m, 1H), 4.17 (q,  $J = 7$  Hz, 1H), 2.68 (m, 1H), 1.59-1.17 (m, 10H): 1.39 (d,  $J = 6.9$  Hz), 1.07-0.72 (m, 3H), 0.31 (s, 3H), 0.28 (s, 3H);  $^{13}\text{C}$  (100 MHz,  $\text{C}_6\text{D}_6$ ): 147, 141.5, 134.3, 129.1, 128 (2), 126.4, 56.4, 52.9, 36, 35.2, 27.2, 27.1, 26.1, 22, 1.5, 1.2;  $^{29}\text{Si}$  NMR (80 MHz,  $\text{C}_6\text{D}_6$ ) -4.1 (s).

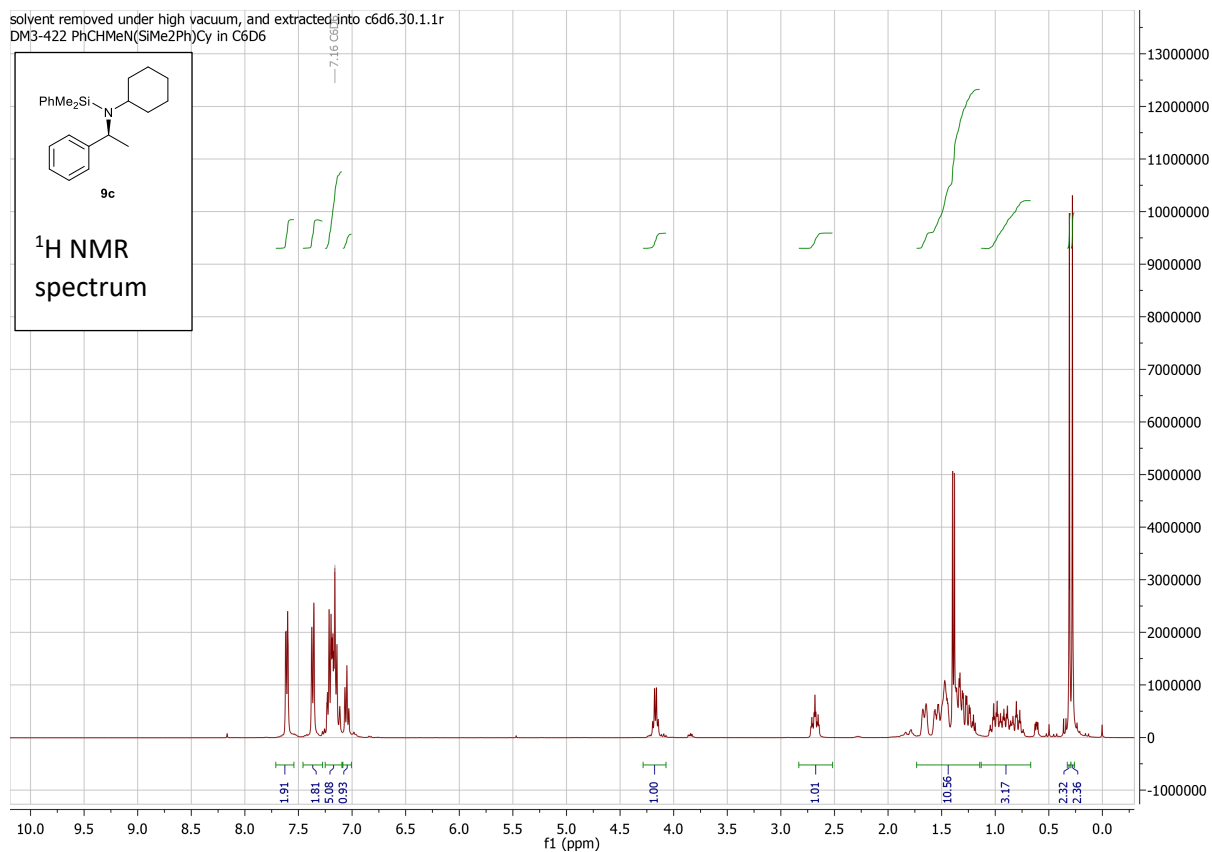

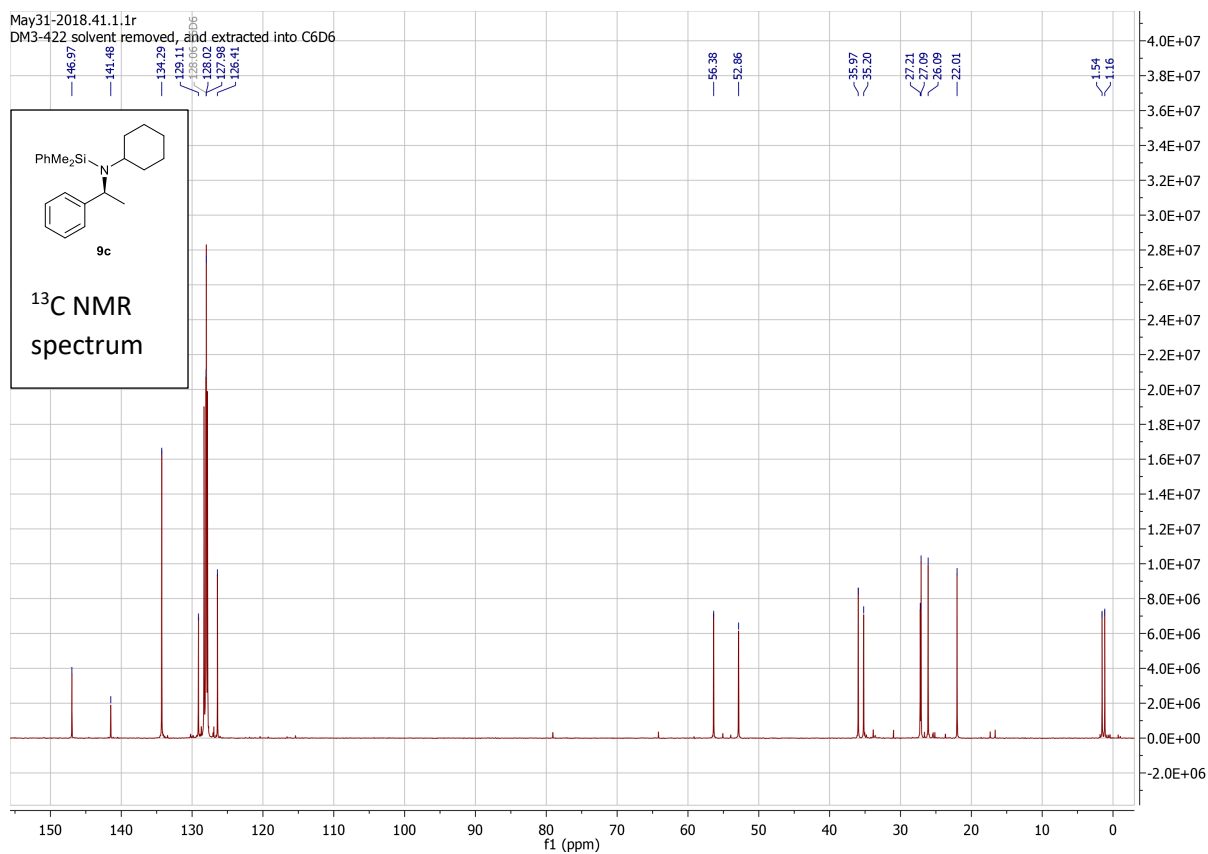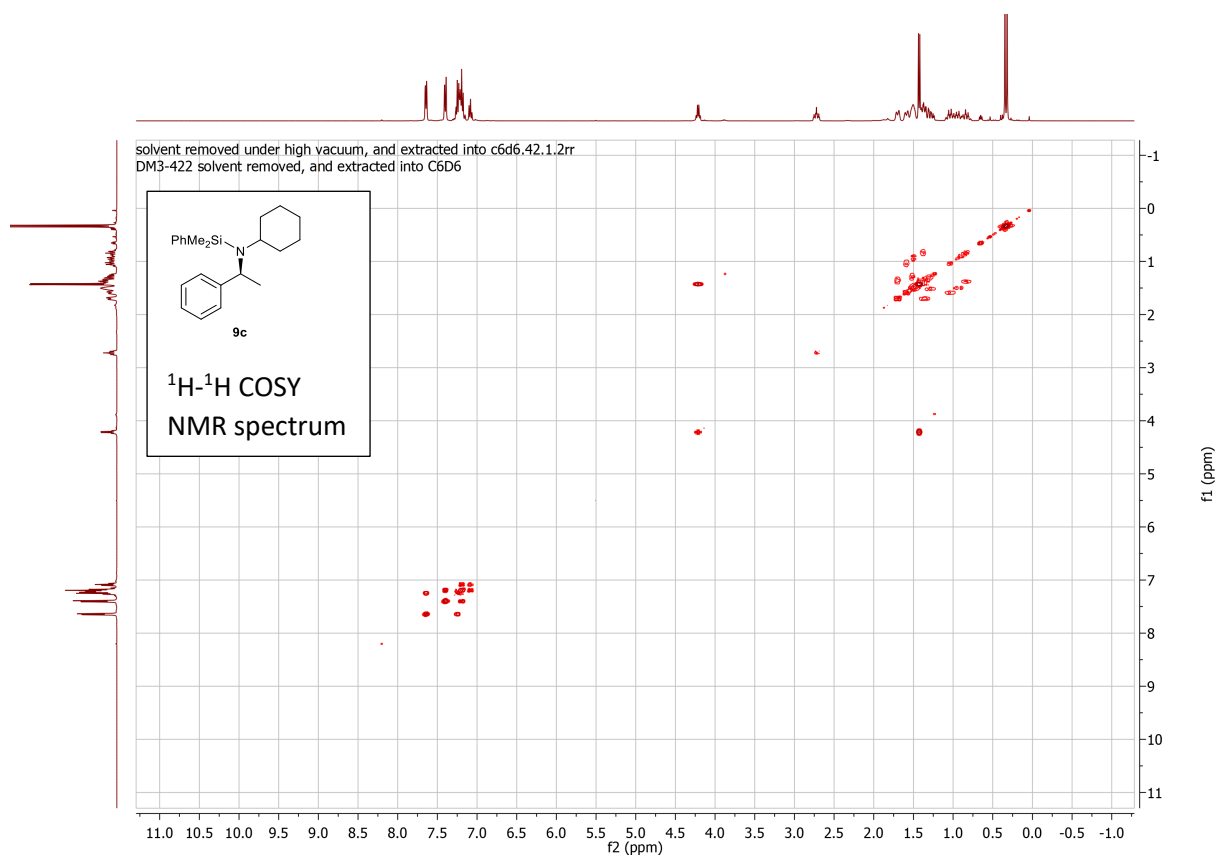

May31-2018.43.1.1r  
DM3-422 solvent removed, and extracted into C6D6

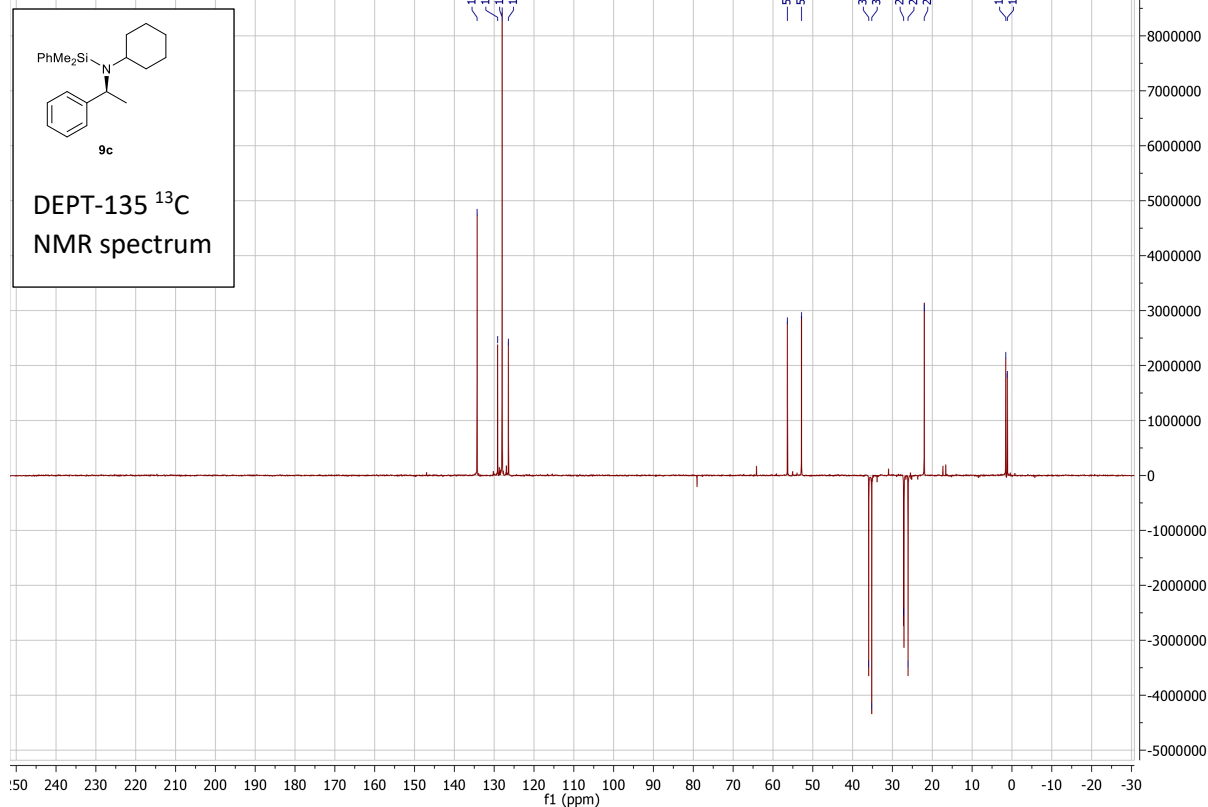

May31-2018.44.1.1r  
DM3-422 solvent removed, and extracted into C6D6

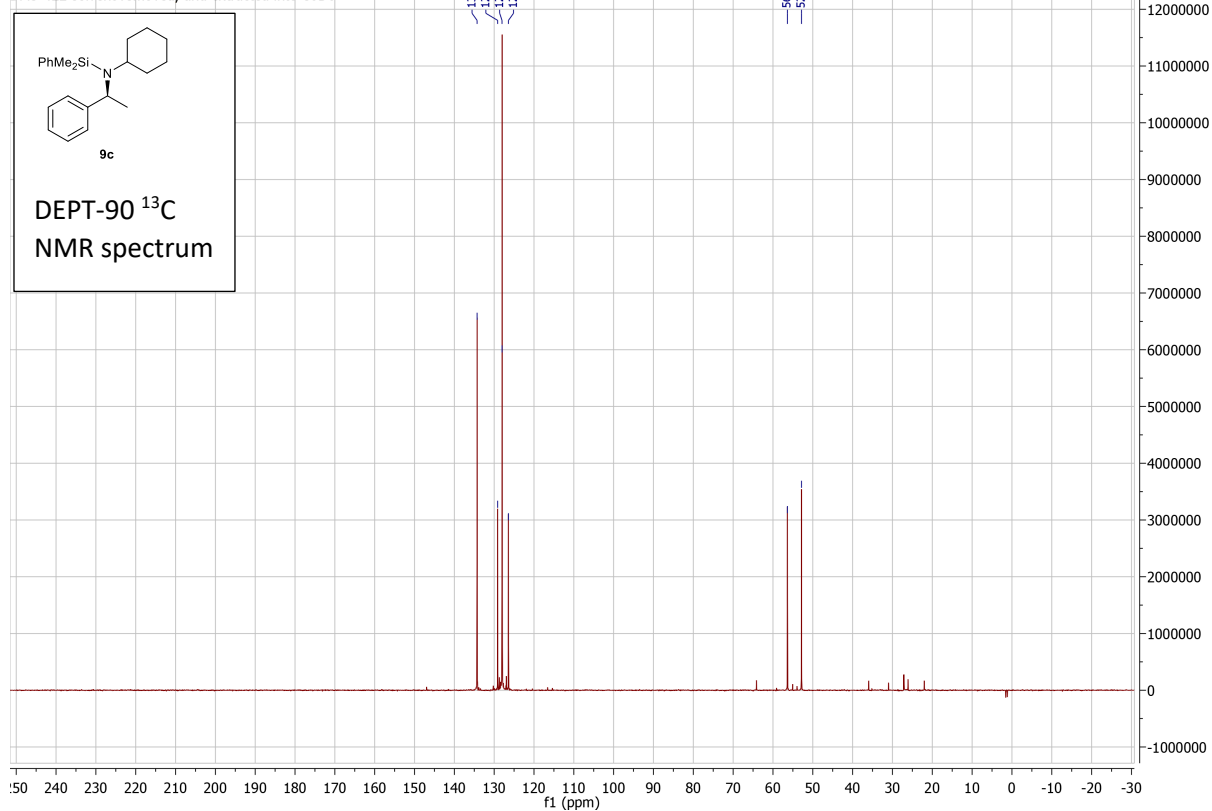



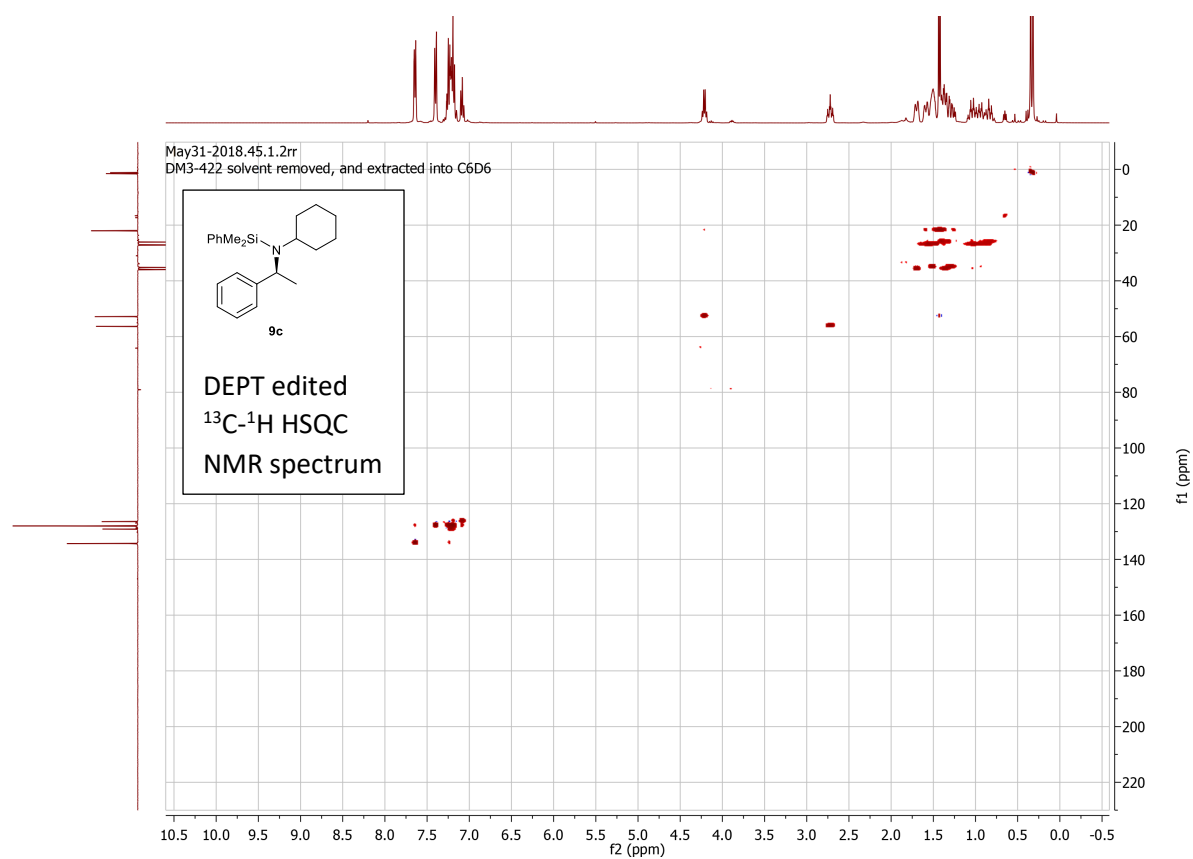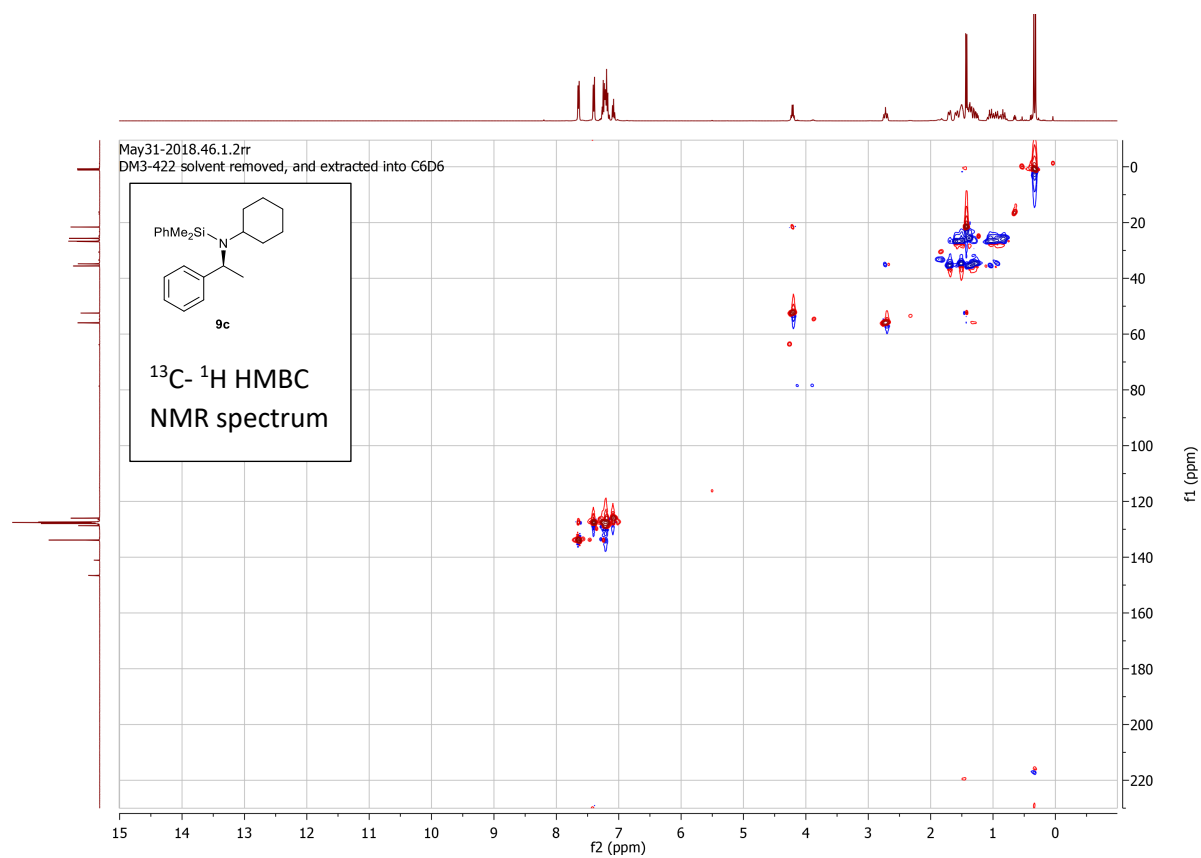

solvent removed under high vacuum, and extracted into c6d6.31.1.1r  
DM3-422 PhCHMeN(SiMe2Ph)Cy in C6D6

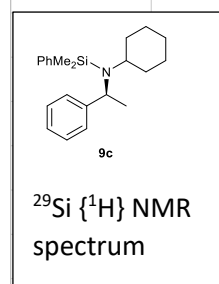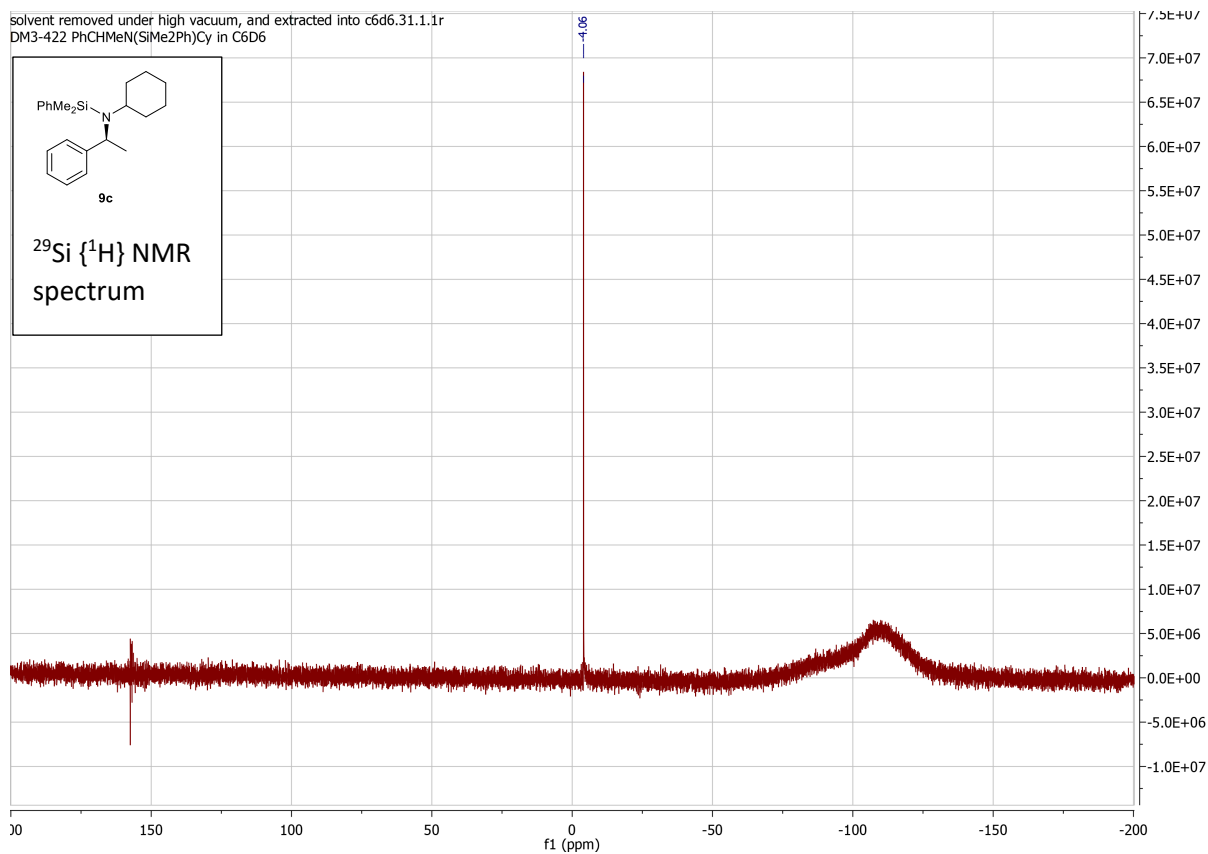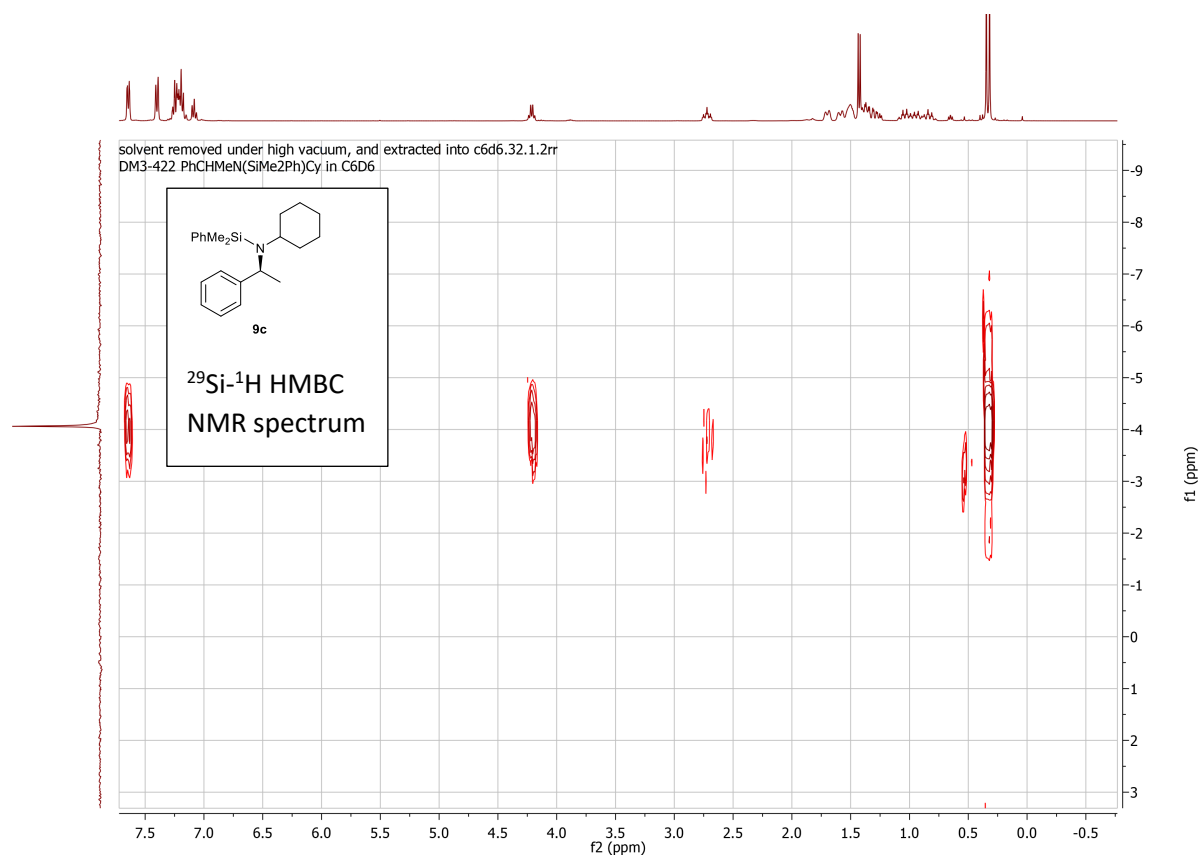

## 4.2 NMR monitoring and mechanistic interpretation

The hydrosilylation of *N*-aryl ketimine **4a** is characterised by the profile in **Figure S5**: starting material is present throughout the reaction. The hydrosilylation of *N*-alkyl ketimine **4c** is characterised by the profile in **Figure S6**: starting material is consumed rapidly to generate reaction intermediates **5c** and **8c**. The intermediates are then slowly converted to final product **9c**. When the hydrosilylation of substrate **4c** was carried out in 1,2-DFB to 34% conversion the product amine could be isolated with an *e.r.* value of 90.5:9.5. The rate of hydrosilylation depends on the nature of the hydrosilane reducing agent: **Figure S7**. These observations are summarised in **Figure S8**.

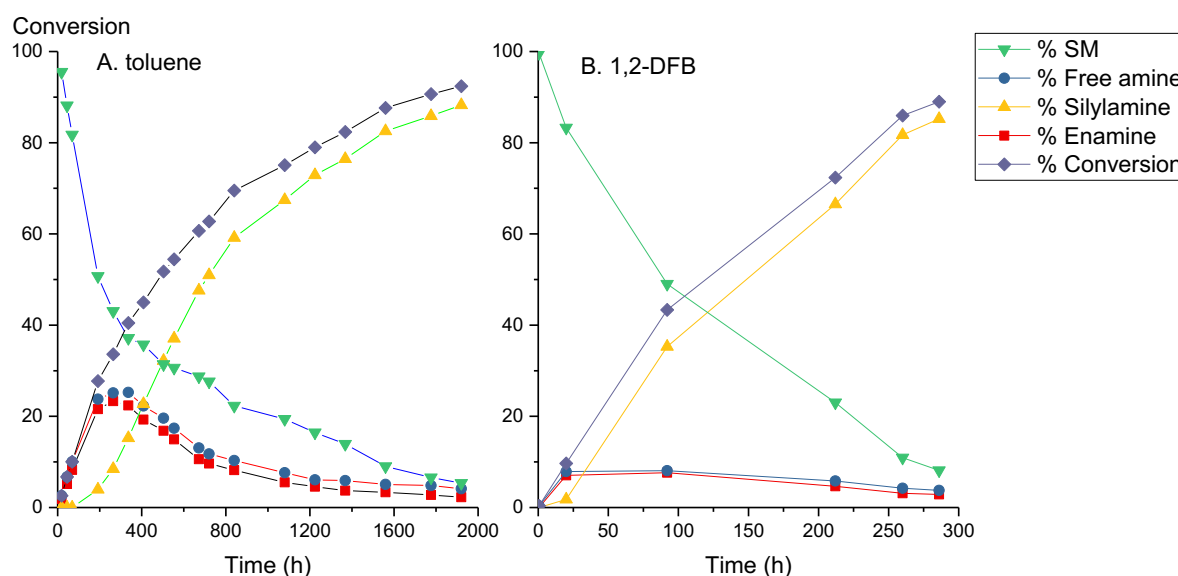

**Figure S5.** Solvent effect in the hydrosilylation of substrate **4a**, 4 mol% **2a**, 1.1 equiv.  $\text{Ph}_2\text{MeSiH}$

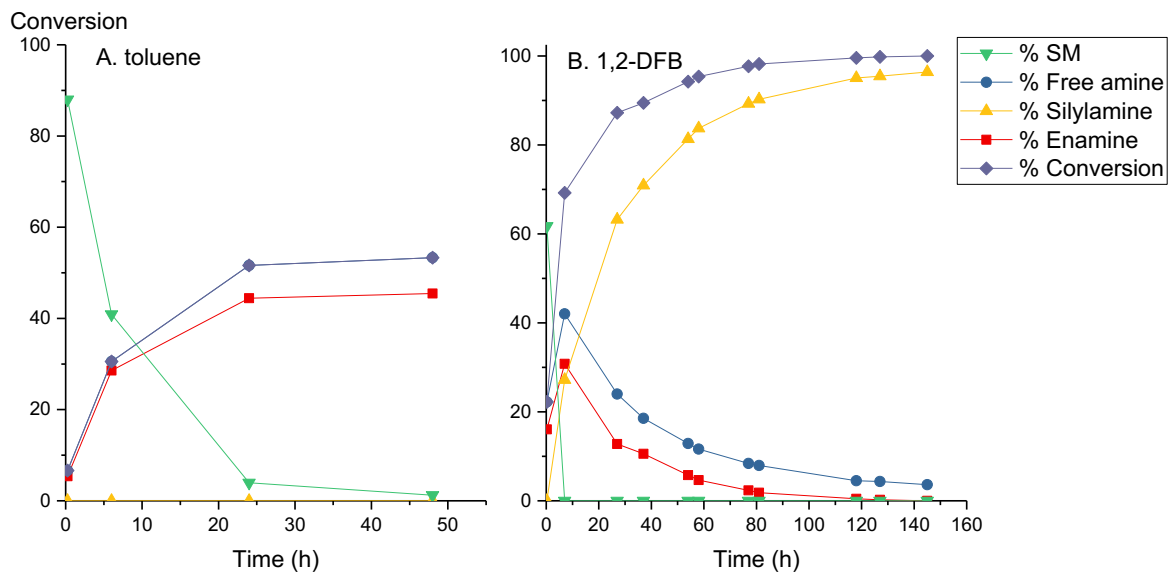

**Figure S6.** Solvent effect in the hydrosilylation of substrate **4c**, 4 mol% **2a**, 1.1 equiv.  $\text{PhMe}_2\text{SiH}$

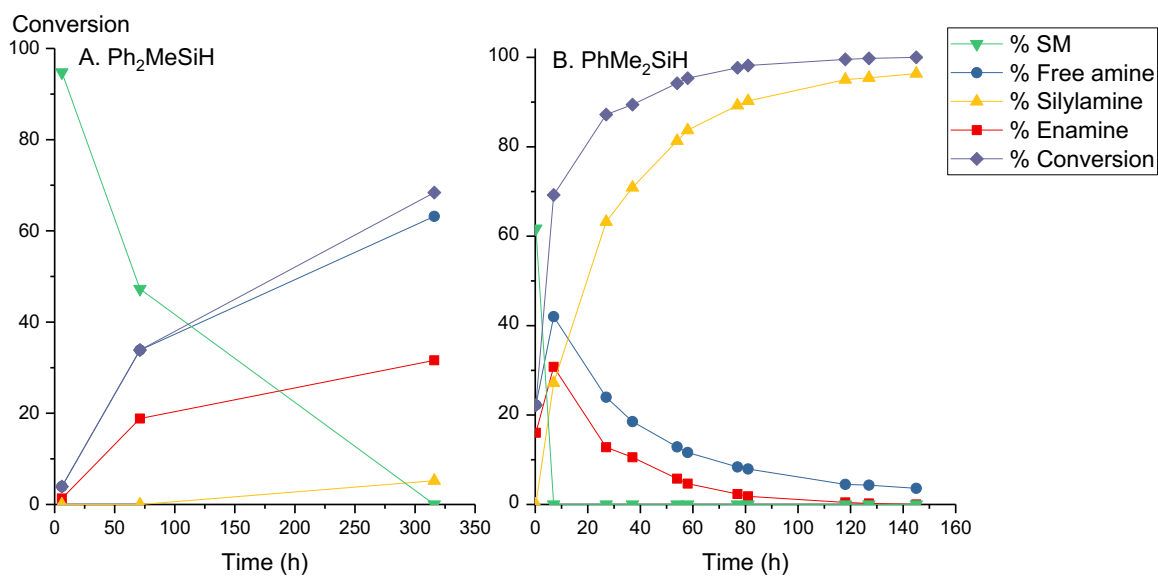

**Figure S7.** Reagent effect in the hydrosilylation of substrate **4c**, 4 mol% **2a**, 1.2-DFB

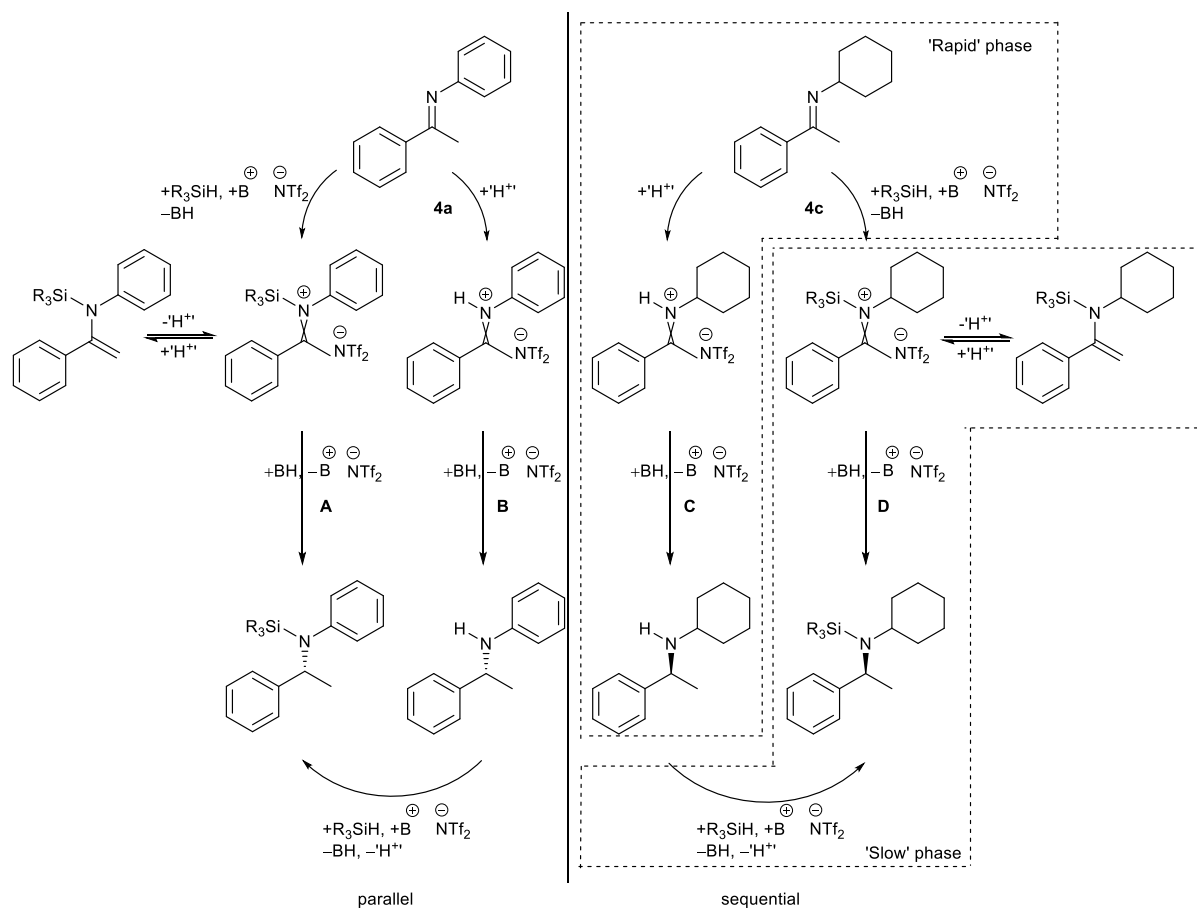

**Figure S8.** Mechanistic interpretation of reactivity difference between substrates **4a** and **4c**;  $\pm H^+$  denotes proton exchange with any competent species.

### 4.3 Copies of reaction NMR spectra for **4a-c**

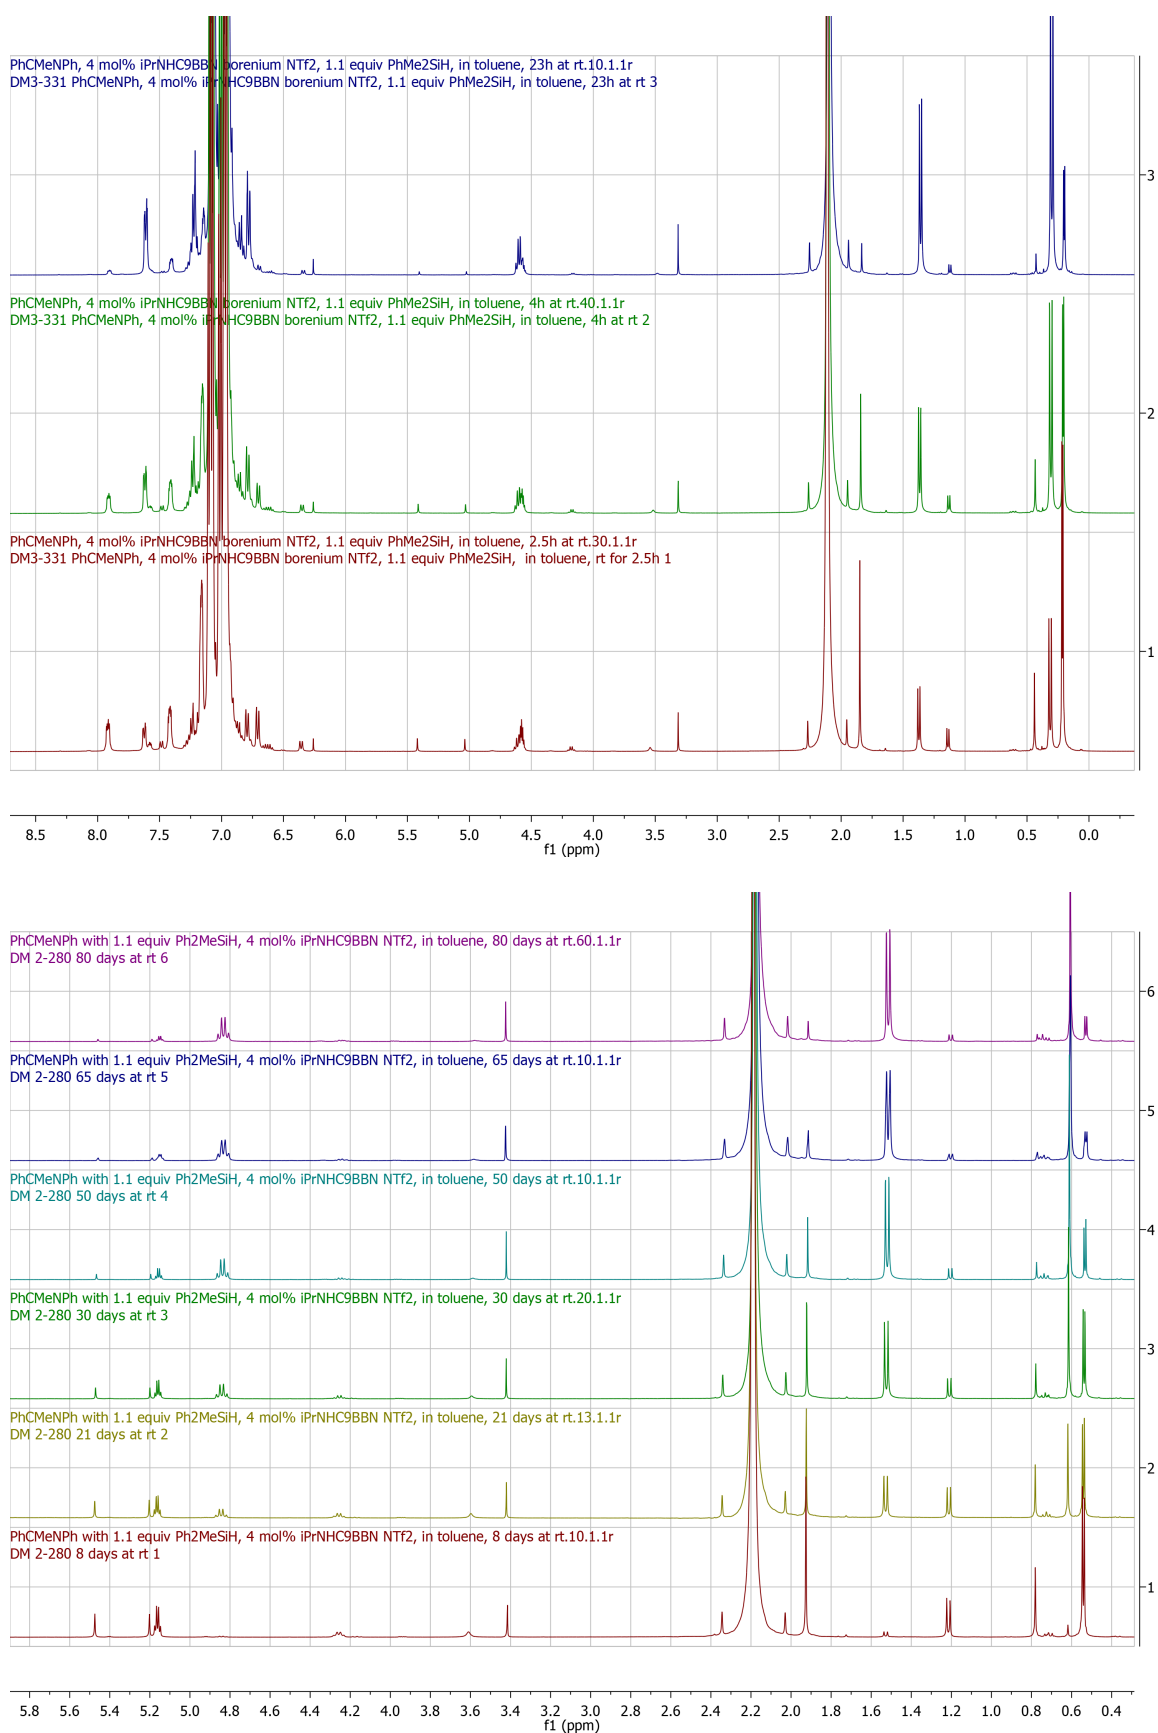

**Figure S9.** <sup>1</sup>H reaction NMR spectra: substrate **4a**, 4 mol% **2a**, 1.1 equiv. PhMe<sub>2</sub>SiH or Ph<sub>2</sub>MeSiH, toluene

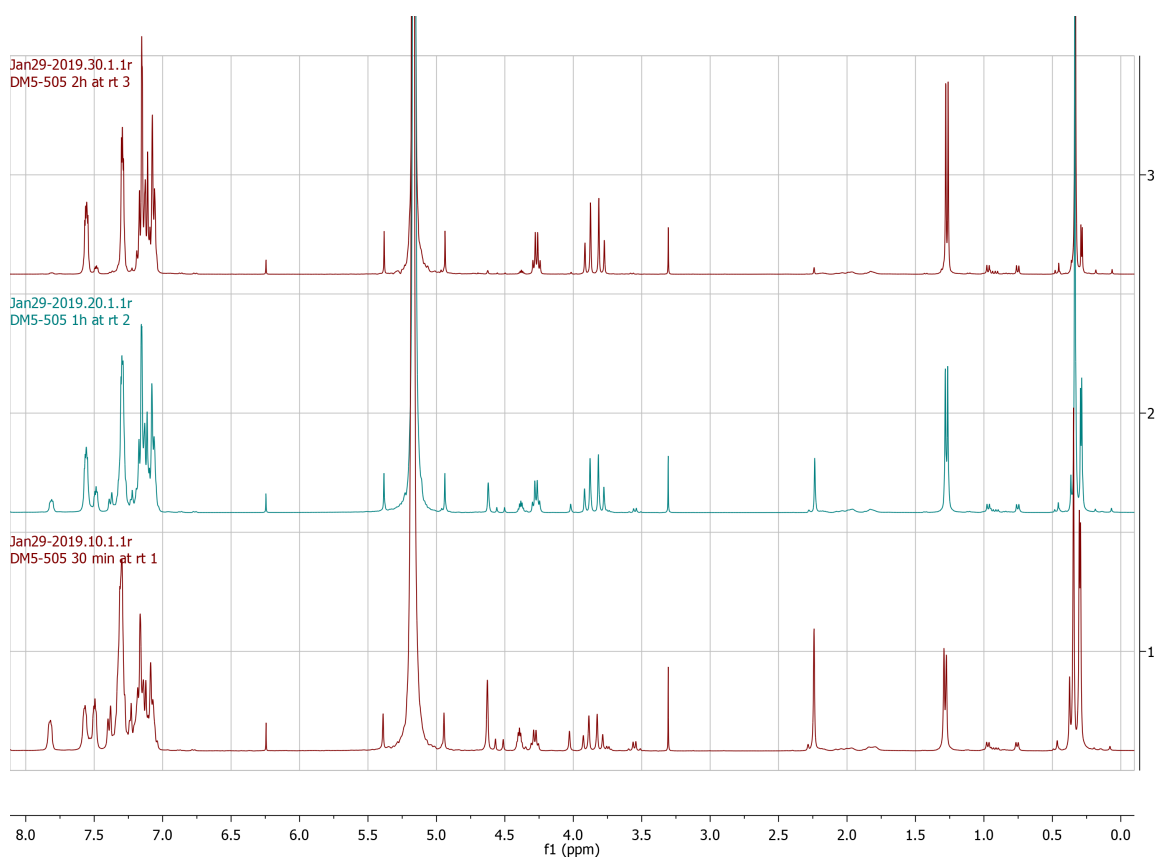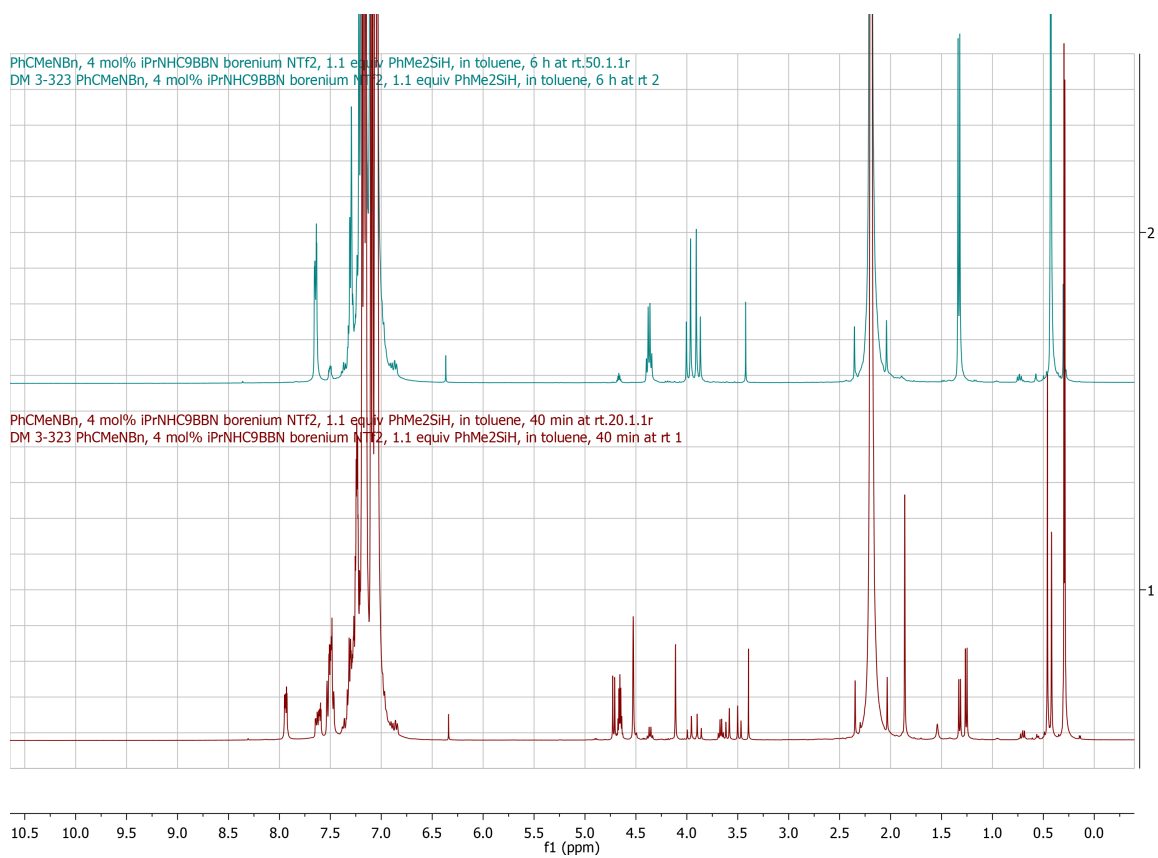

**Figure S10.**  $^1\text{H}$  reaction NMR spectra for substrate **4b**, 4 mol% **2a**, 1.1 equiv.  $\text{PhMe}_2\text{SiH}$ , in DCM and toluene, respectively

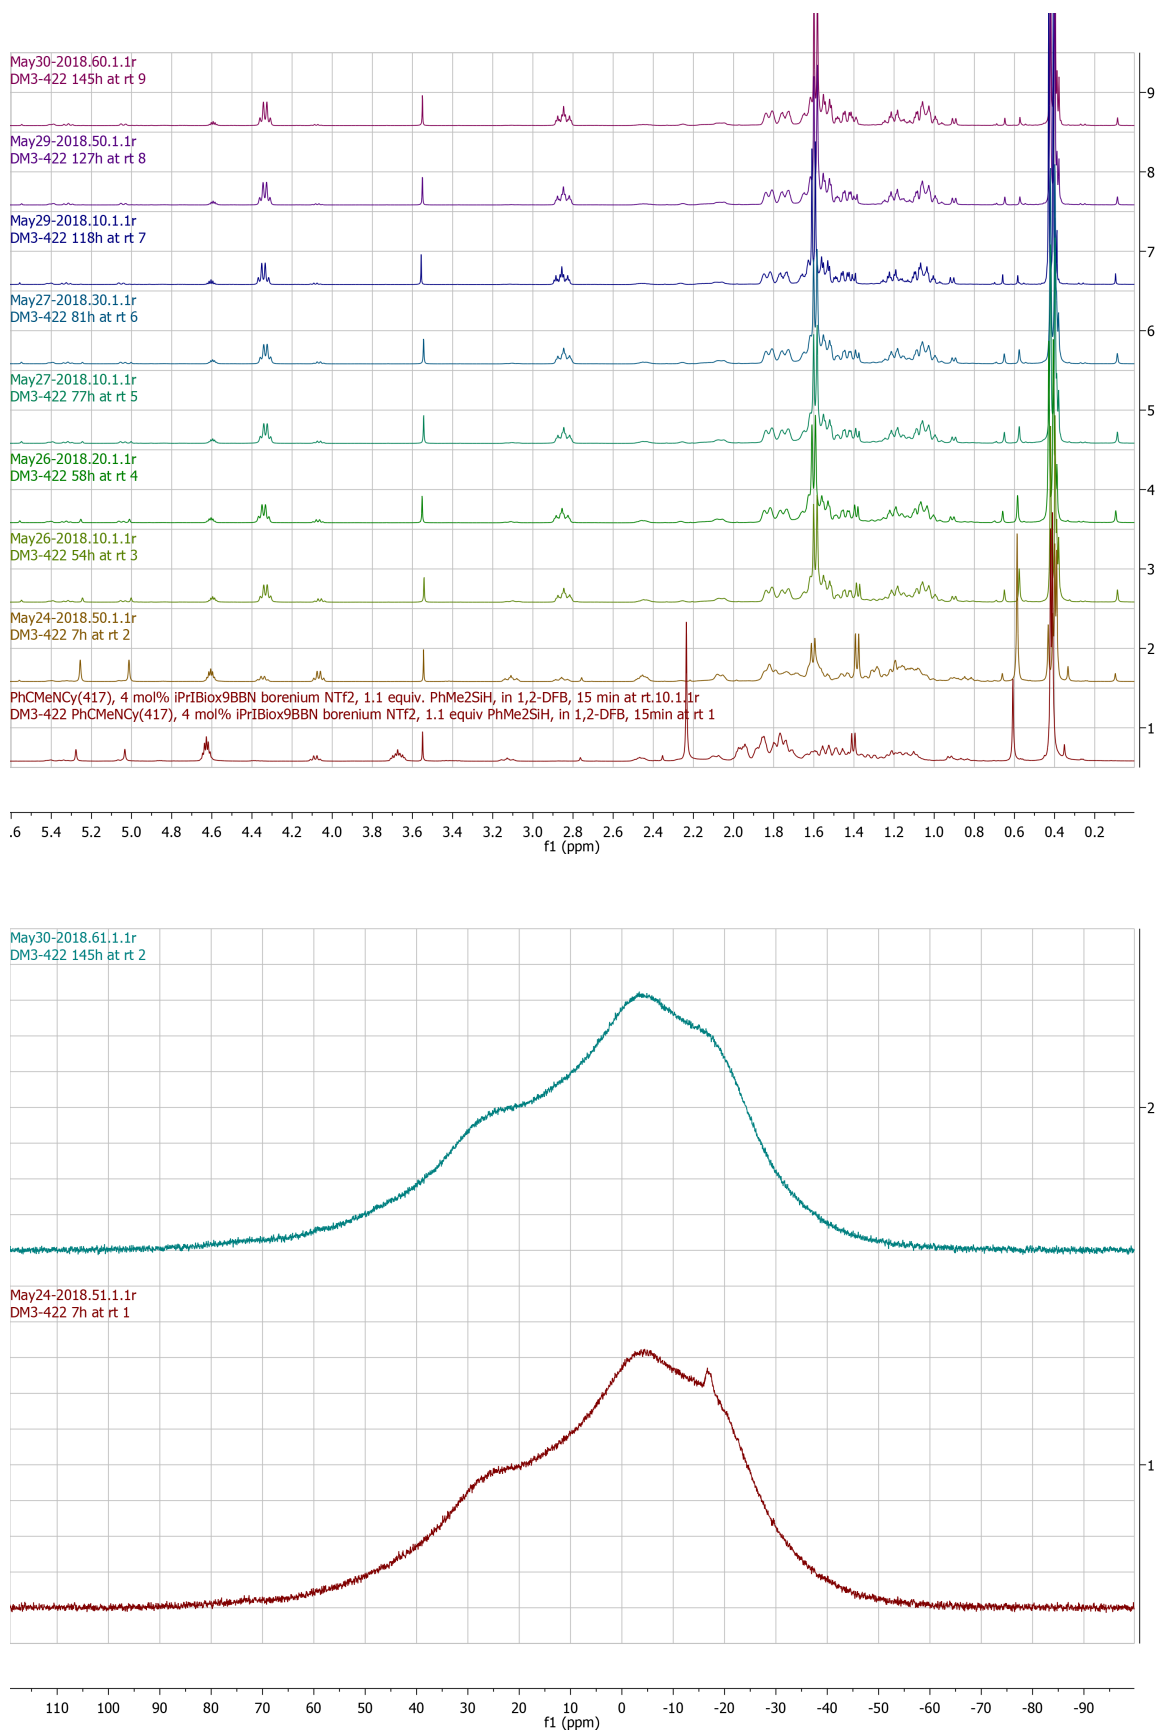

**Figure S11.**  $^1\text{H}$  and  $^{11}\text{B}$  reaction NMR spectra for substrate **4c**, 4 mol% **2a**, 1. 1 equiv.  $\text{PhMe}_2\text{SiH}$ , 1,2-DFB



#### 4.4 Catalyst **2e** assessment

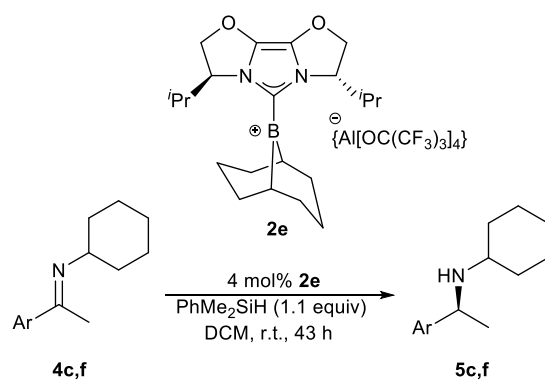

| Ar         | Conversion | Yield | <i>e.r</i> ( <i>S</i> : <i>R</i> ) |
|------------|------------|-------|------------------------------------|
| Ph         | 70%        | 60%   | 95:5                               |
| 2-Naphthyl | 78%        | 60%   | 96:4                               |

**Table S12.** Hydrosilylation in the presence of a very weakly coordinating counterion.

## 5. Hydrogenation catalysis

Monitoring was performed by carrying out reactions in NMR tubes equipped with Young's valves (4 bar, achieved by admitting hydrogen gas to degassed samples at liquid nitrogen temperature) or in Wilmad high pressure NMR tubes fitted with a PV-ANV PTFE valve (up to 10 bar, room temperature). Reactions were set up in an inert atmosphere glovebox, sealed and then pressurised on a dual manifold system; hydrogen gas (BOC Research Grade) was purified using a Matheson Tri-Gas Weldassure<sup>TM</sup> column. Temperature was room temperature unless otherwise stated. Purification was carried out through flash column chromatography (column I.D. ~2.5cm, ~10-15g silicagel) or by preparative TLC (20x20cm, 0.2mm thickness).

Screening was performed on a Symyx SPR system using a 48-well plate. Reactions were carried out in HPLC vials and were set up in an inert atmosphere glovebox. Lines were flushed with nitrogen prior to connection then the assembly was flushed with hydrogen gas (4x60 psi). The temperature was adjusted (30 °C) before the assembly was pressurised and sealed. Agitation was carried out with a circular motion (500 rpm) for the duration of the reaction. NMR analysis was carried out in CDCl<sub>3</sub>.

In both cases NMR conversions were determined by relative integration of relevant species. Where necessary polymerisation/hydrolysis of SM was taken into account.

## 5.1 Reaction development

Details of preliminary development involving counterion (OTf, OMs, OTs) (**Figure S13**) and substrate/solvent screening are included (**Table S14**).

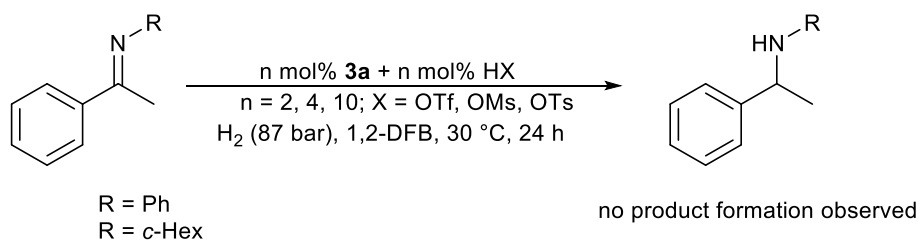

**Figure S13.** Counterion screening at various catalyst loadings

$^{11}\text{B}$  NMR data indicates that counterion coordination to the boron atom limits reactivity. Treatment of borohydride **3a** with HOTf generated a species (characterised *in situ*) displaying a chemical shift of 6.0 ppm (1,2-DFB), which is indicative of four-coordinate boron, through coordination of the smaller and more basic OTf counterion.

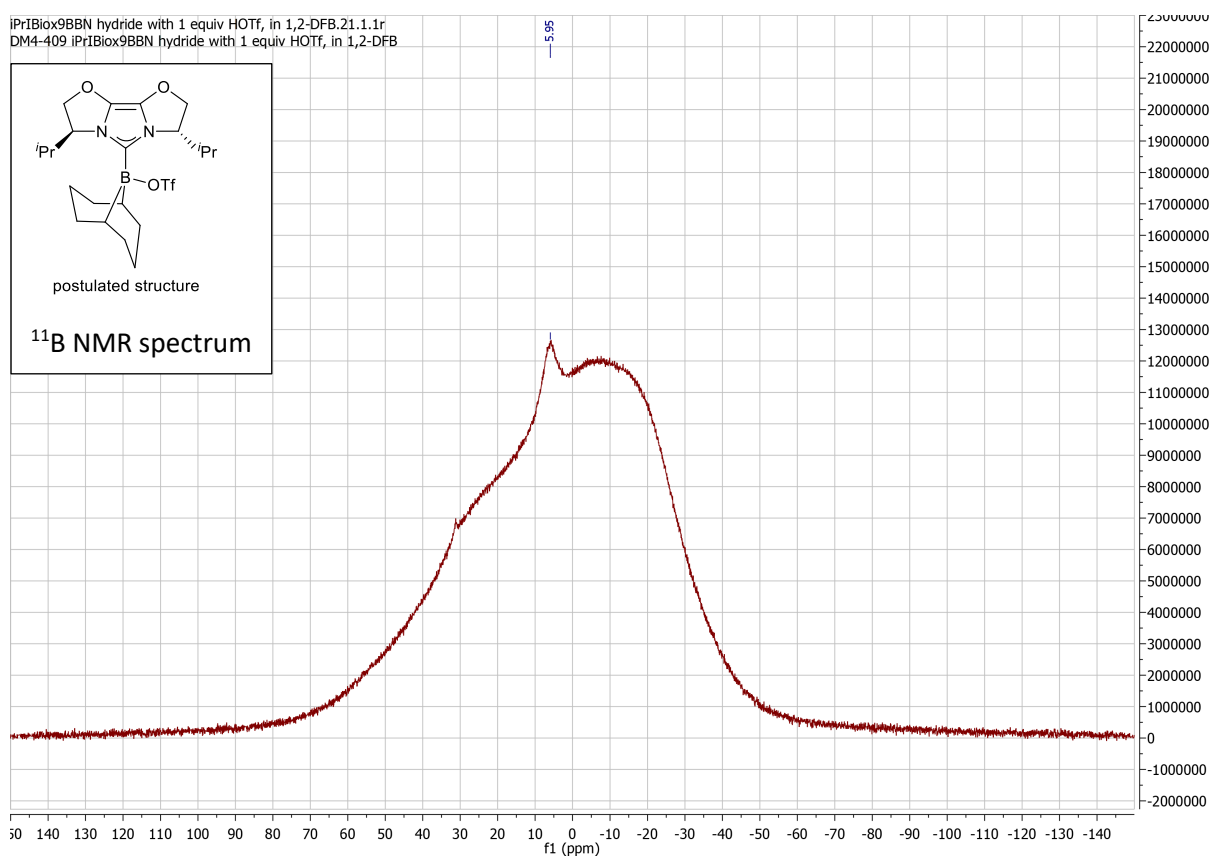

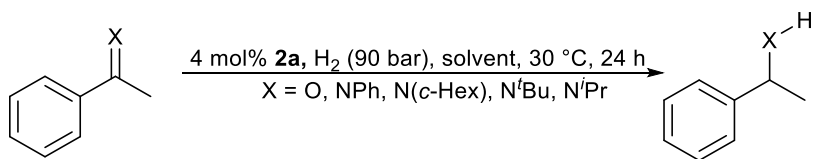

for X = NPh see table **S14**

for all other substrates no product formation was observed

solvent = toluene, o-xylene, diethyl ether, THF, 1,4-dioxane, TBME, sulfolane,  
1,2-DFB, acetonitrile

| Solvent ( $\epsilon_r$ )      | Conversion | <i>e.r.</i> (R:S) |
|-------------------------------|------------|-------------------|
| Acetonitrile (37.5)           | 0%         | -                 |
| Tetrahydrofuran (7.6)         | 3%         | 55.5:44.5         |
| o-xylene (2.57)               | 8%         | 64:36             |
| Toluene (2.38)                | 10%        | 64:36             |
| Methyl tert-butyl ether (4.5) | 29%        | 54:46             |
| Diethyl ether (4.3)           | 37%        | 53:47             |
| 1,4-Dioxane (2.21)            | 42%        | 58:42             |
| Sulfolane (44)/toluene 1:1    | 53%        | 58:42             |
| 1,2-DFB (13.8)                | 100%       | 59:41             |

**Table S14.** Substrate/solvent screen at 4 mol% catalyst loading

## 6. General procedure for the synthesis of racemic amines and acetamides

Ketimine **4** (100 mg, x mmol) and sodium borohydride (y mg, 2x mmol) were weighed and to the resulting mixture MeOH (generally 1 mL) was added (hydrogen evolution). The solution was stirred at room temperature for the specified amount of time. The MeOH was removed and the resulting residue extracted with DCM (or pentane/heptane) with filtration. The resulting crude product was purified by flash column chromatography (10-15g silica).

| Product        | Reaction time | Purification                     | Yield | Appearance      |
|----------------|---------------|----------------------------------|-------|-----------------|
| (±)- <b>5a</b> | 5 h           | 100:1 P: EA                      | 83%   | Yellow oil      |
| (±)- <b>5b</b> | 19 h          | 10:1 P: EA, 1% Et <sub>3</sub> N | 71%   | Yellow oil      |
| (±)- <b>5c</b> | 18 h          | 3:1 P: EA, 1% Et <sub>3</sub> N  | 71%   | Colourless oil  |
| (±)- <b>5d</b> | 24 h          | 4:1 P: EA, 1% Et <sub>3</sub> N  | 71%   | Yellow oil      |
| (±)- <b>5e</b> | 19 h          | 4:1 P: EA, 1% Et <sub>3</sub> N  | 76%   | Colourless oil  |
| (±)- <b>5f</b> | 21 h          | 4:1 P: EA, 1% Et <sub>3</sub> N  | 82%   | Pale yellow oil |
| (±)- <b>5g</b> | 20 h          | 4:1 P: EA, 1% Et <sub>3</sub> N  | 65%   | Colourless oil  |
| (±)- <b>5i</b> | 22 h          | 10:1 P: EA, 1% Et <sub>3</sub> N | 40%   | Colourless oil  |

**Table S15.** Racemic amine preparation

To a solution of amine (±)-**5** (<30 mg) in DCM (0.5 or 1 mL DCM) was added triethylamine (2 equiv, approx. volume) and then acetic anhydride (4 equiv, approx. volume). The resulting solution was allowed to react at room temperature with or without stirring for the indicated period of time. Sometimes an extra batch of reagents was added. The volatiles were removed and the resulting residue purified by flash column chromatography (~1-2g silica).

| Product        | Reaction time | Purification | Yield | Appearance      |
|----------------|---------------|--------------|-------|-----------------|
| <b>(±)-10c</b> | 27 h          | 4:1 P: EA    | 79%   | Colourless oil  |
| <b>(±)-10d</b> | 4 h           | 4:1 P: EA    | 28%   | Colourless oil  |
| <b>(±)-10e</b> | 16 h          | 4:1 P: EA    | 84%   | White solid     |
| <b>(±)-10f</b> | 21 h          | 4:1 P: EA    | 75%   | White solid     |
| <b>(±)-10g</b> | 15 h          | 1:1 P: EA    | 92%   | Pale yellow oil |
| <b>(±)-10i</b> | 24 h          | 4:1 P: EA    | 81%   | White solid     |

**Table S16.** Racemic acetamide preparation

## 7. Characterisation data

### 7.1 Characterisation data for chiral enantioenriched amines **5** and copies of NMR spectra

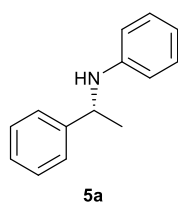

$[\alpha]_D^{26} = -4.6^\circ$  (c 7.47, MeOH, 65:35 *e.r.*); literature value:  $[\alpha]_{578}^{25} = -19.5^\circ$  (MeOH, R enantiomer)<sup>10</sup>

98% purity, 97% yield (elution performed with 0.5% EtOAc, 0.5 % Et<sub>3</sub>N in pentane)

<sup>1</sup>H NMR (400 MHz, CDCl<sub>3</sub>) 7.38 (m, 4H), 7.27 (m, 2H), 7.13 (m, 2H), 6.68 (m, 1H), 6.55 (m, 2H), 4.53 (q, *J* = 6.8 Hz, 1H), 4.06 (br.s, 1H), 1.56 (d, *J* = 6.8 Hz, 3H); <sup>13</sup>C NMR (100 MHz, CDCl<sub>3</sub>) 147.3, 145.3, 129.2, 128.8, 127, 126, 117.5, 113.5, 53.7, 25.1. IR (neat, cm<sup>-1</sup>) 3051, 3407, 3020, 2964, 2922, 2865, 1597, 1500, 1447, 1314, 1255, 746, 690; HRMS (ES+) calculated for C<sub>14</sub>H<sub>16</sub>N ([M+H]<sup>+</sup>) 198.1283, found 198.1290.

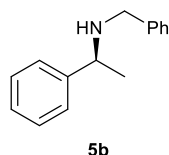

$[\alpha]_D^{26} = -30.2^\circ$  (c 7.03, cyclopentane, 82:18 *e.r.*); Literature value:  $[\alpha]_D^{20} = -49.2^\circ$  (cyclopentane, S enantiomer)<sup>11</sup>

<sup>1</sup>H NMR (400 MHz, CDCl<sub>3</sub>) 7.32 (m, 10H), 3.83 (q, *J* = 6.8 Hz, 1H), 3.64 (m, 2H), 1.65 (br. s, 1H), 1.38 (d, *J* = 6.8 Hz, 3H); <sup>13</sup>C NMR (100 MHz, CDCl<sub>3</sub>) 145.6, 140.7, 128.5, 128.4, 128.2, 127, 126.9, 126.7, 57.5, 51.7, 24.5; HRMS (ES+) calculated for C<sub>15</sub>H<sub>18</sub>N ([M+H]<sup>+</sup>) 212.1439, found 212.1446; IR (neat, cm<sup>-1</sup>) 3024, 2960, 2922, 2834, 1491, 1450, 1117, 1027, 759, 732, 695.

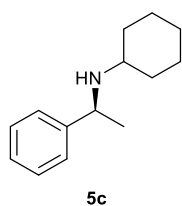

$[\alpha]_D^{25} = -49.8^\circ$  (c 2.77,  $\text{CHCl}_3$ , 89:11 *e.r.*); Literature value:  $[\alpha]_D^{25} = +67.7^\circ$  ( $\text{CHCl}_3$ , R enantiomer)<sup>12</sup>

$^1\text{H}$  NMR (400 MHz,  $\text{CDCl}_3$ ) 7.35-7.2 (m, 5H); 3.95 (q,  $J = 6.5$  Hz, 1H), 2.27 (m, 1H), 1.98 (m, 1H), 1.73-1.45 (m, 5H), 1.32 (d,  $J = 6.5$  Hz, 3H), 1.24-0.95 (m, 5H);  $^{13}\text{C}$  NMR (100 MHz,  $\text{CDCl}_3$ ) 146.5, 128.5, 126.8, 126.6, 54.5, 53.7, 34.7, 33.3, 26.3, 25.4, 25.2, 25.1. HRMS (ES+) calculated for  $\text{C}_{14}\text{H}_{22}\text{N}$  ( $[\text{M}+\text{H}]^+$ ) 204.1752, found 204.1760; IR (neat,  $\text{cm}^{-1}$ ) 2921, 2850, 1491, 1448, 1366, 1127, 760, 699.

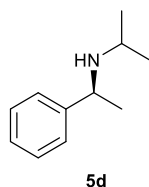

$[\alpha]_D^{22} = -43.2^\circ$  (c 0.97,  $\text{CH}_2\text{Cl}_2$ , 90:10 *e.r.*), literature value  $[\alpha]_D^{25} = -29.2^\circ$  (neat, S enantiomer)<sup>13</sup>

$^1\text{H}$  NMR (400 MHz,  $\text{CDCl}_3$ ) 7.31 (m, 5H), 3.92 (q,  $J = 6.6$  Hz, 1H), 2.65 (septet,  $J = 6.3$  Hz), 1.49 (br. s, 1H), 1.37 (d,  $J = 6.7$  Hz, 3H), 1.04 (dd,  $J = 6.1, 6.6$  Hz, 6H);  $^{13}\text{C}$  NMR (100 MHz,  $\text{CDCl}_3$ ) 146.3, 128.5, 126.9, 126.6, 55.2, 45.6, 25, 24, 22.3; HRMS (ES+) calculated for  $\text{C}_{11}\text{H}_{18}\text{N}$  ( $[\text{M}+\text{H}]^+$ ) 164.1439, found 164.1450; IR (neat,  $\text{cm}^{-1}$ ) 2959, 2924, 2864, 1472, 1465, 1450, 1378, 1366, 1169, 1126, 1102, 1021, 759, 698, 585, 554, 517.



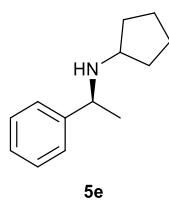

$[\alpha]_D^{25} = -52^\circ$  (c 3.38,  $\text{CH}_2\text{Cl}_2$ , 90:10 *e.r.*); literature value:  $[\alpha]_D^{20} +63.8^\circ$  ( $\text{CHCl}_3$ , R enantiomer)<sup>14</sup>

$^1\text{H}$  NMR (400 MHz,  $\text{CDCl}_3$ ) 7.32 (m, 4H), 7.24 (m, 1H), 3.83 (q,  $J = 6.5$  Hz, 1H), 2.89 (p,  $J = 7$  Hz, 1H), 1.88-1.57 (m, 5H), 1.45 (m, 2H), 1.35 (d,  $J = 6.8$  Hz, 3H), 1.37-1.19 (m, 2H);  $^{13}\text{C}$  NMR (100 MHz,  $\text{CDCl}_3$ ) 146.1, 128.5, 127, 126.8, 57.3, 56.8, 33.9, 33, 24.7, 24.1, 24; HRMS ES+ calculated for  $\text{C}_{13}\text{H}_{20}\text{N}$  ( $[\text{M}+\text{H}]^+$ ) 190.1596, found 190.1601; IR (neat,  $\text{cm}^{-1}$ ) 2952, 2864, 1491, 1464, 1449, 1130, 760, 699.

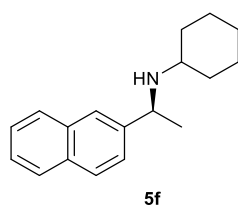

$[\alpha]_D^{25} = -52.4^\circ$  (c 5.15,  $\text{CHCl}_3$ , 96:4 *e.r.*), literature value:  $[\alpha]_D^{23} = -56.5^\circ$  ( $\text{CHCl}_3$ , S enantiomer)<sup>15</sup>

$^1\text{H}$  NMR (400 MHz,  $\text{CDCl}_3$ ) 7.82 (m, 3H), 7.72 (m, 1H), 7.46 (m, 3H), 4.14 (q,  $J = 6.8$  Hz, 1H), 2.29 (m, 1H), 2.03 (m, 1H), 1.67 (m, 3H), 1.54 (m, 1H), 1.4 (d,  $J = 6.6$  Hz, 3H), 1.36-1.22 (m, 1H), 1.18-0.97 (m, 5H);  $^{13}\text{C}$  NMR (100 MHz,  $\text{CDCl}_3$ ) 144, 133.6, 132.9, 128.3, 127.9, 127.8, 126, 125.5, 125.2, 125, 54.8, 53.9, 34.8, 26.3, 25.4, 25.2, 25.1. HRMS (ES+) calculated for  $\text{C}_{18}\text{H}_{24}\text{N}$  ( $[\text{M}+\text{H}]^+$ ) 254.1909, found 254.1910; IR (neat,  $\text{cm}^{-1}$ ) 3051, 2920, 2849, 1506, 1457, 1446, 1365, 1314, 1268, 1128, 887, 854, 816, 744.

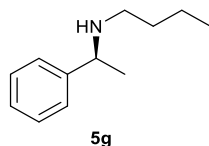

$[\alpha]_D^{25} = -28.8^\circ$  (c 3.4,  $\text{CH}_2\text{Cl}_2$ , 79:21 *e.r.*); Literature value:  $[\alpha]_D^{25} -84^\circ$  (neat, S enantiomer)<sup>13</sup>

$^1\text{H}$  NMR (400 MHz,  $\text{CDCl}_3$ ) 7.32 (m, 4H), 7.24 (m, 1H), 3.75 (q,  $J = 6.7$  Hz, 1H), 2.46 (m, 2H), 1.44 (m, 2H), 1.35 (d,  $J = 6.7$  Hz, 3H), 1.29 (m, 1H), 0.87 (t,  $J = 7.4$  Hz, 3H);  $^{13}\text{C}$  NMR (100 MHz,  $\text{CDCl}_3$ ) 146.2, 128.5, 126.9, 126.7, 58.6, 47.7, 32.6, 24.5, 20.6, 14.1; IR (neat,  $\text{cm}^{-1}$ ) 2956, 2924, 2870, 1491, 1464, 1450, 1367, 1129, 759, 698; HRMS ES+ calculated for  $\text{C}_{12}\text{H}_{20}\text{N}$  ( $[\text{M}+\text{H}]^+$ ) 178.1596, found 178.1595.

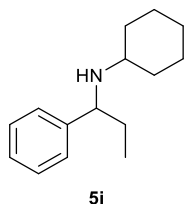

$[\alpha]_D^{25} = -17.4^\circ$  (c 3.23,  $\text{CH}_2\text{Cl}_2$ , 64:36 *e.r.*)

$^1\text{H}$  NMR (400 MHz,  $\text{CDCl}_3$ ) 7.28 (m, 5H), 3.64 (dd,  $J = 5.9$  Hz, 7.8 Hz, 1H), 2.23 (m, 1H), 1.97 (m, 1H, NH), 1.62 (m, 6H), 1.06 (m, 6H), 0.78 (t,  $J = 7.7$  Hz, 3H);  $^{13}\text{C}$  NMR (100 MHz,  $\text{CDCl}_3$ ) 145.2, 128.3, 127.4, 126.8, 61.5, 53.7, 34.9, 33.3, 31.7, 26.4, 25.4, 25, 11.1; HRMS (ES+) calculated for  $\text{C}_{15}\text{H}_{24}\text{N}$  ( $[\text{M}+\text{H}]^+$ ) 218.1909, found 218.1909. IR (neat,  $\text{cm}^{-1}$ ) 2921, 2850, 1448, 1125, 752, 699.

Feb01-2019.70.1.1r  
DM5-503

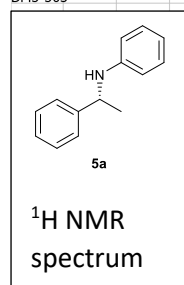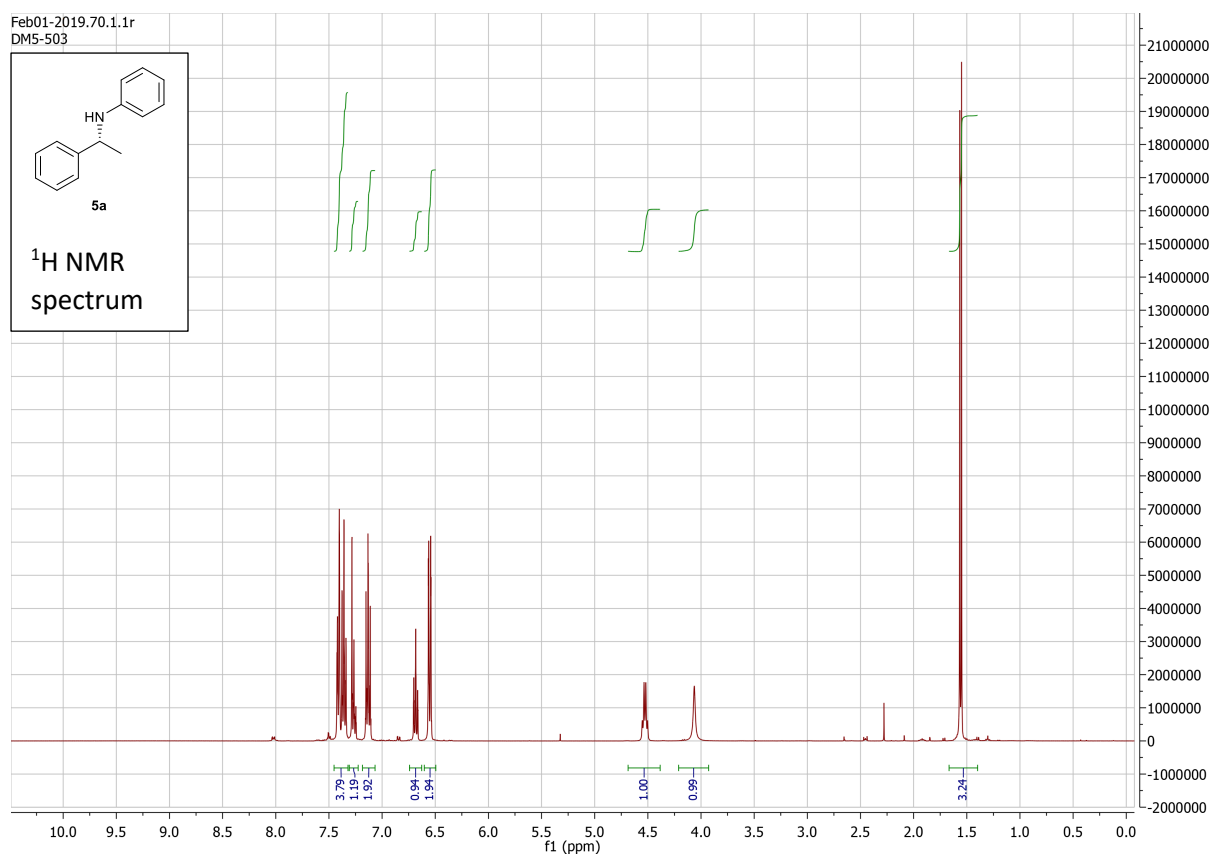

carbon.20.1.1r  
DM3-331

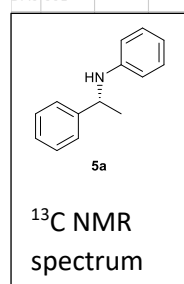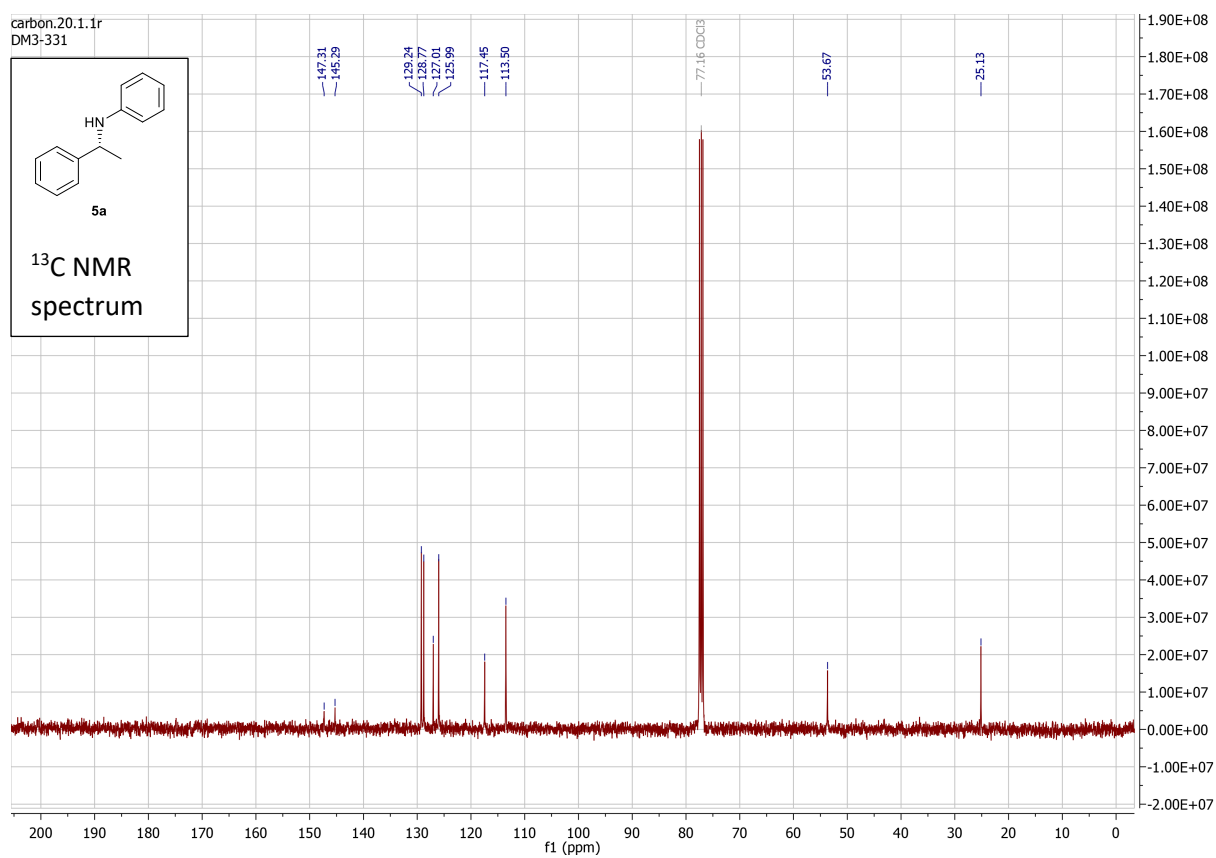

Feb04-2019.40.1.1r  
DM5-505

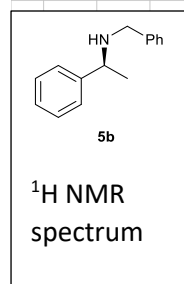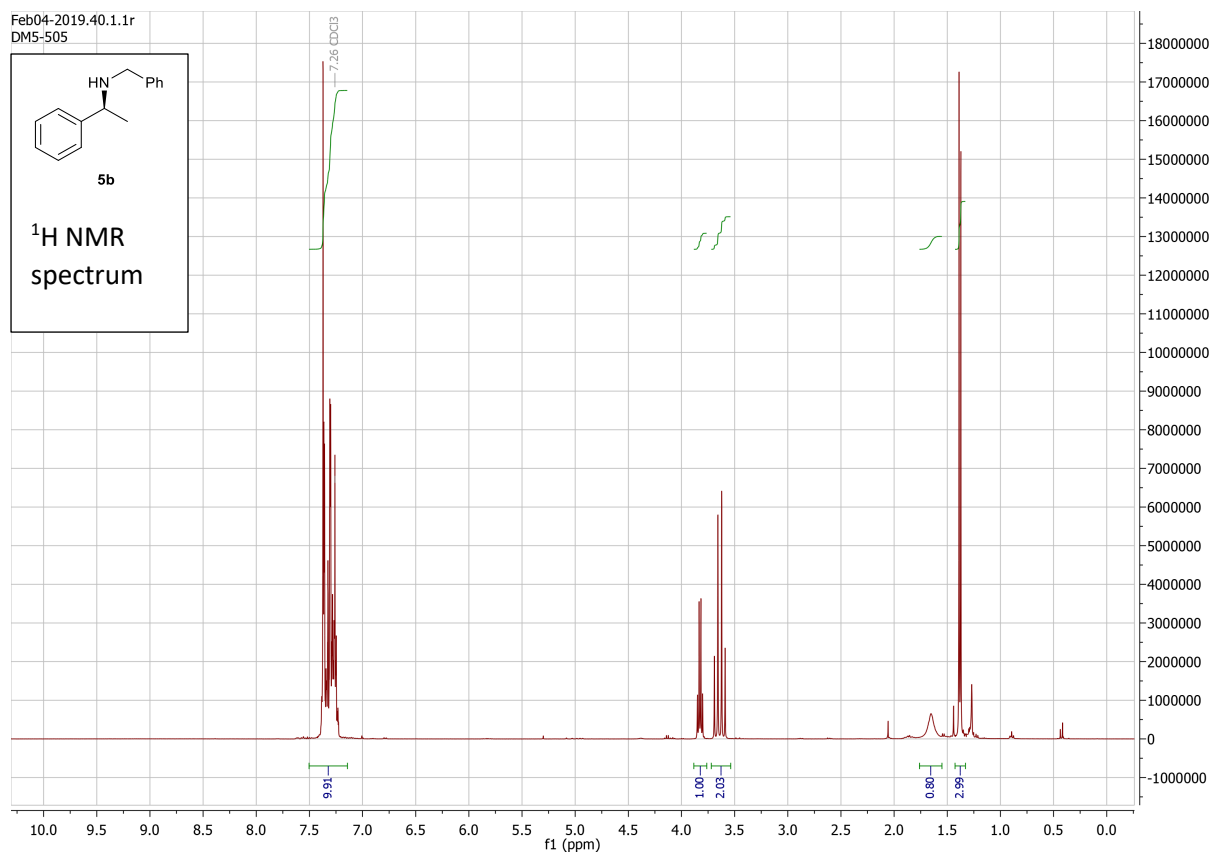

Feb04-2019.41.1.1r  
DM5-505

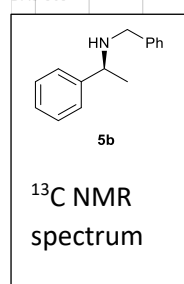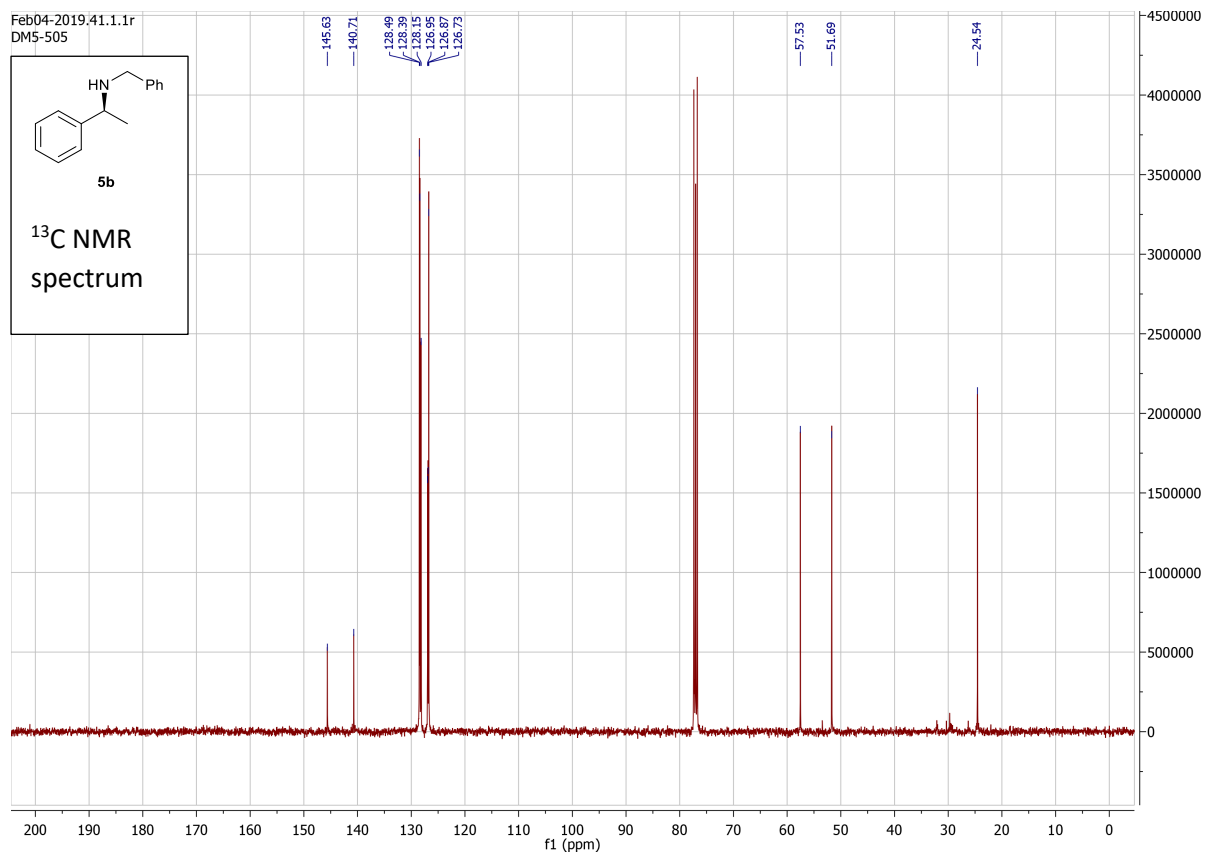

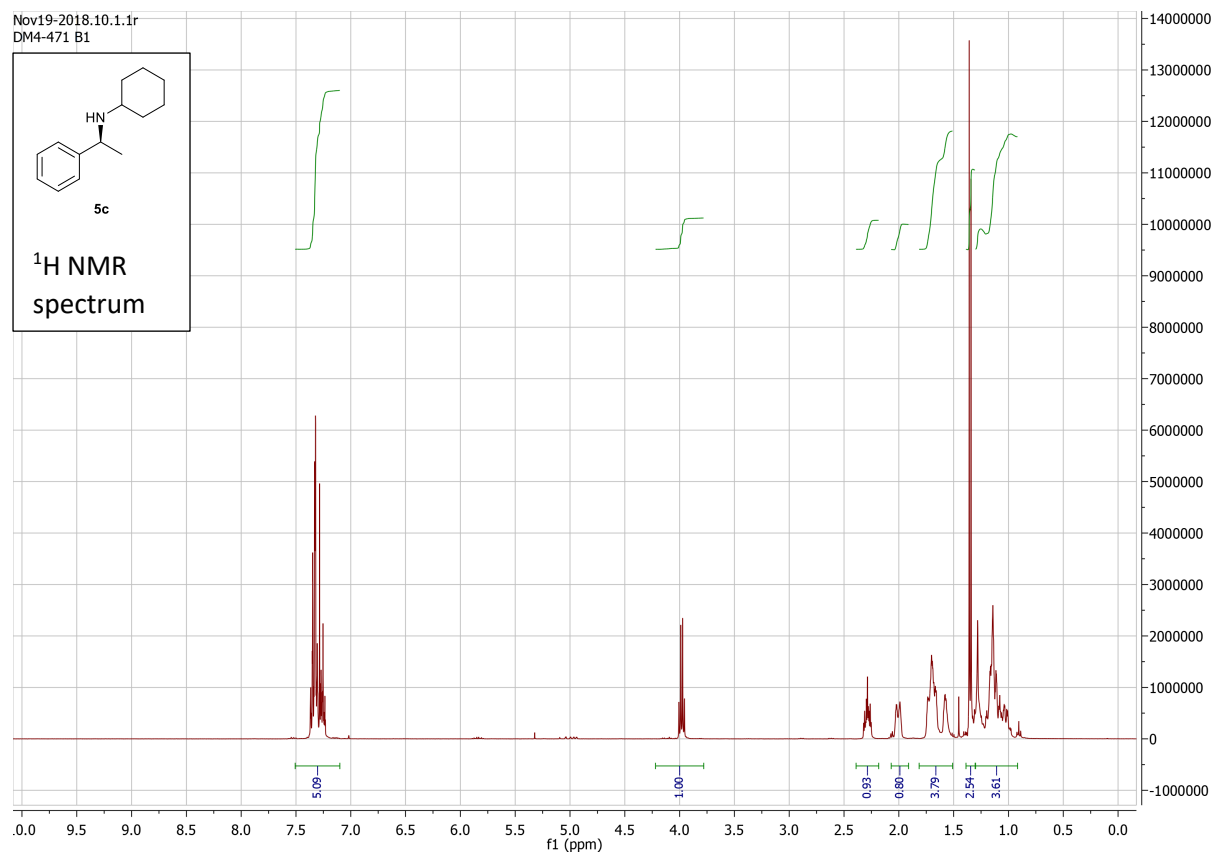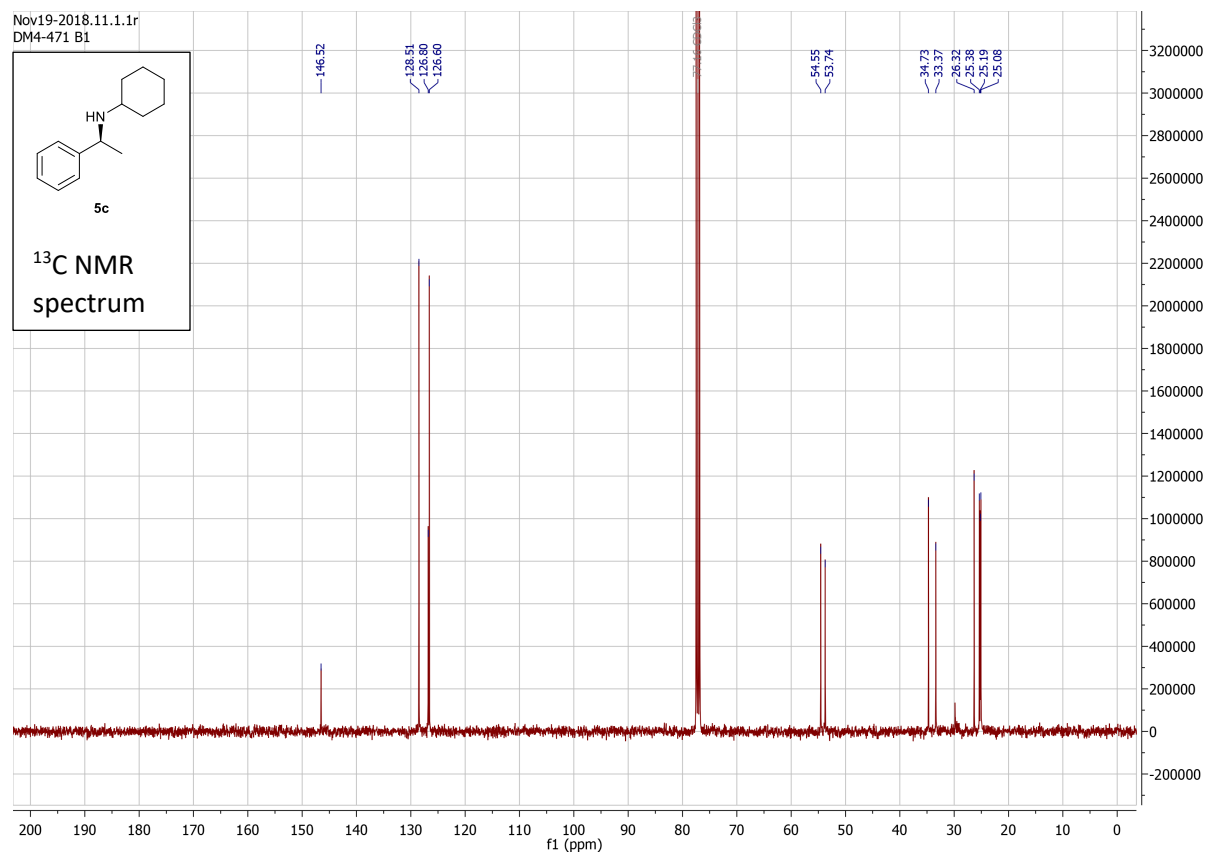

Oct24-2018.20.1.1r  
DM3-453

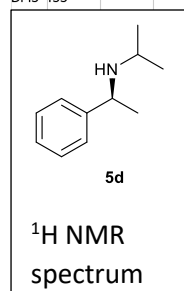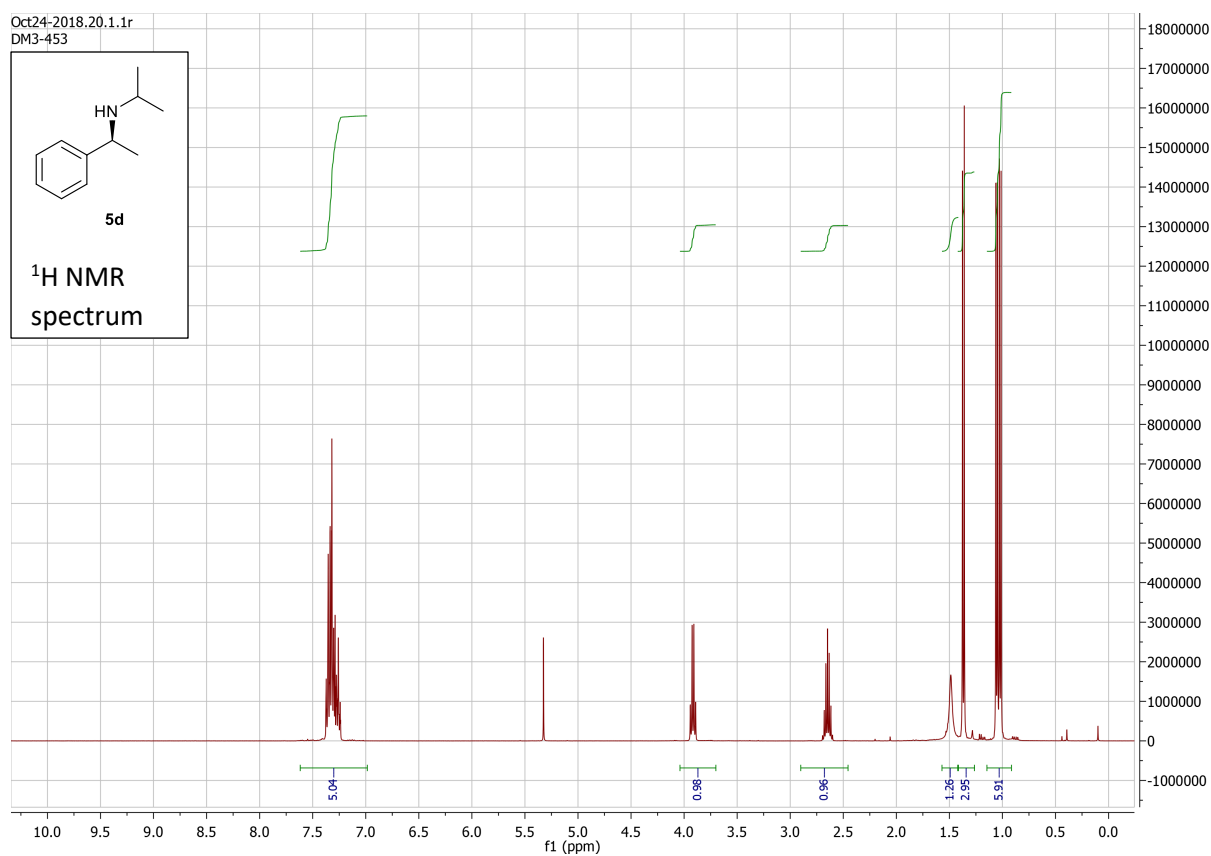

Feb27-2019.81.1.1r  
DM5-511 in cdd3

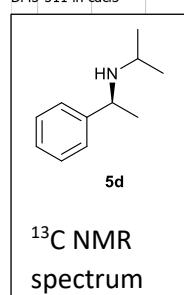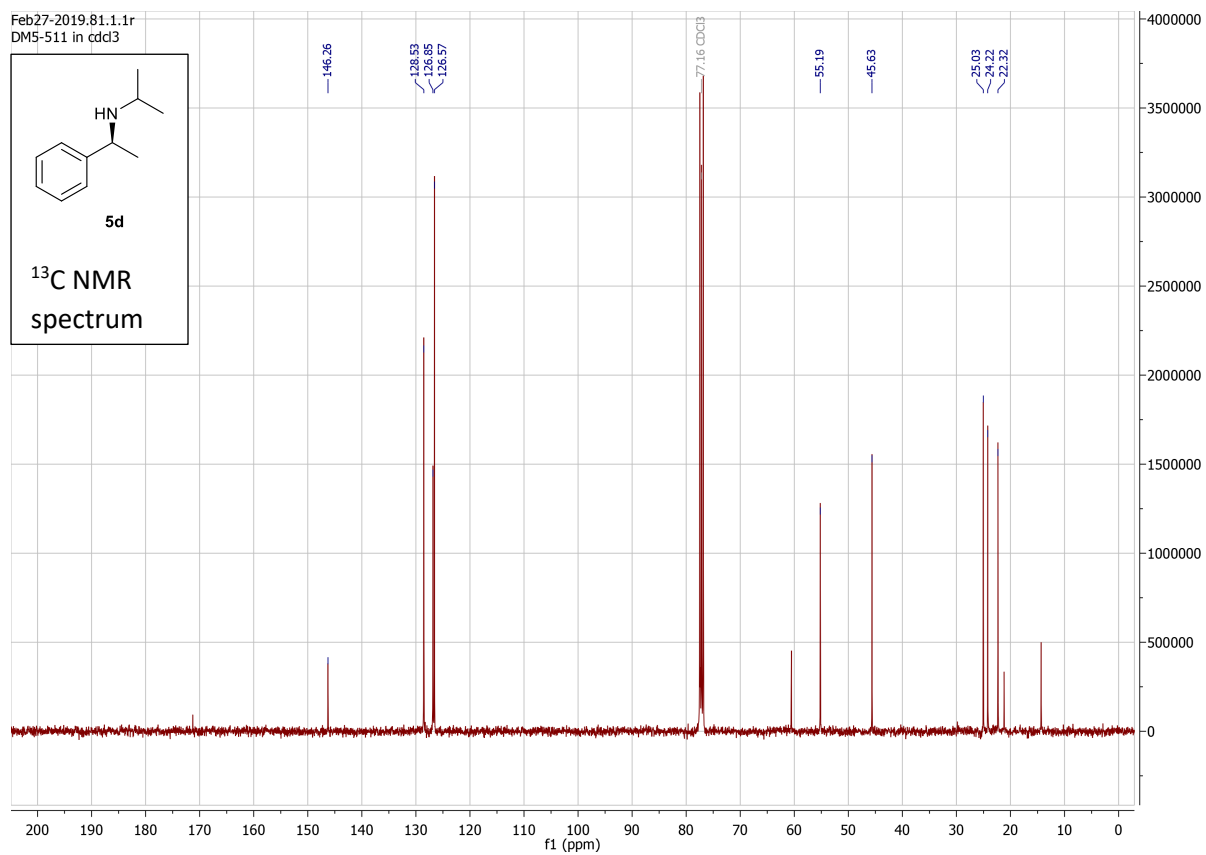

Oct16-2018.70.1.1r  
DM3-455

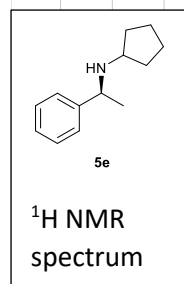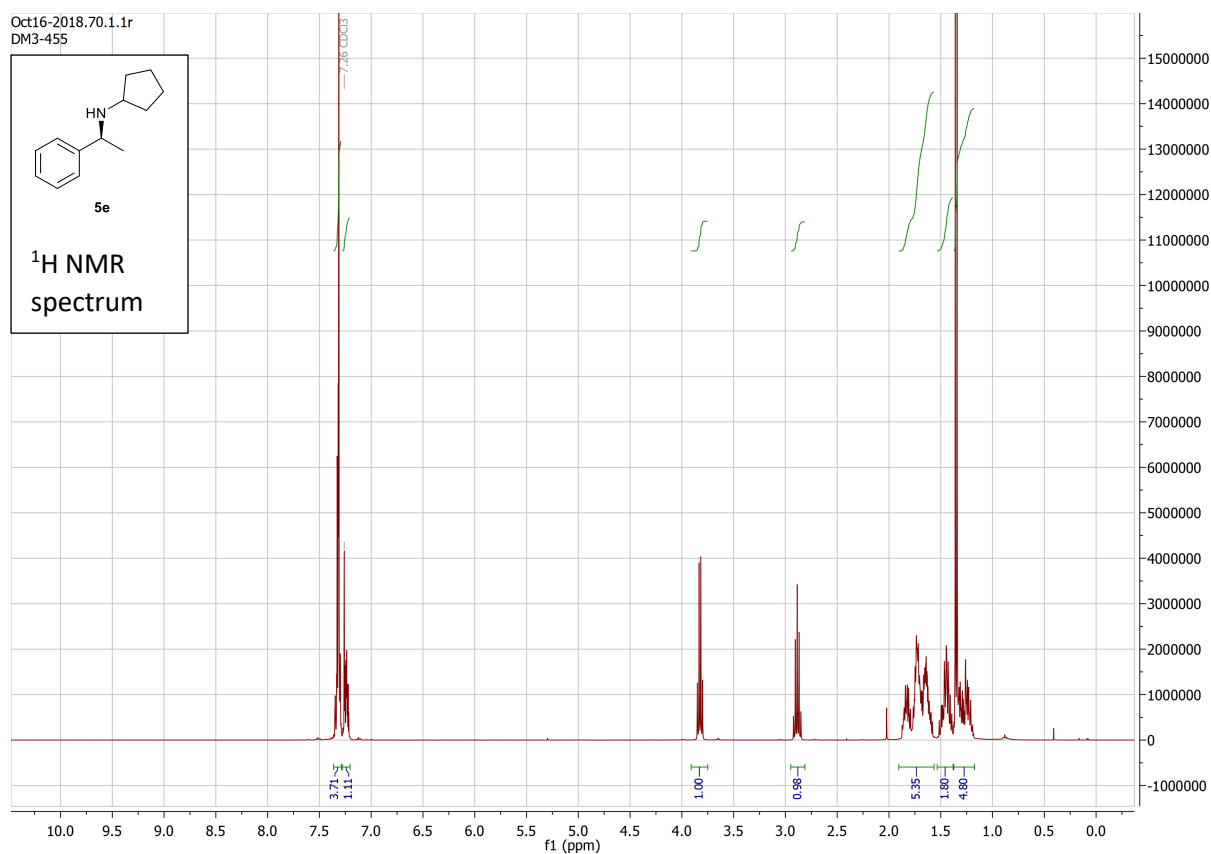

Oct16-2018.71.1.1r  
DM3-455

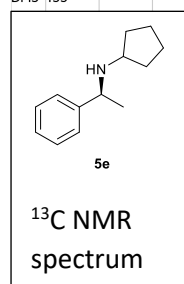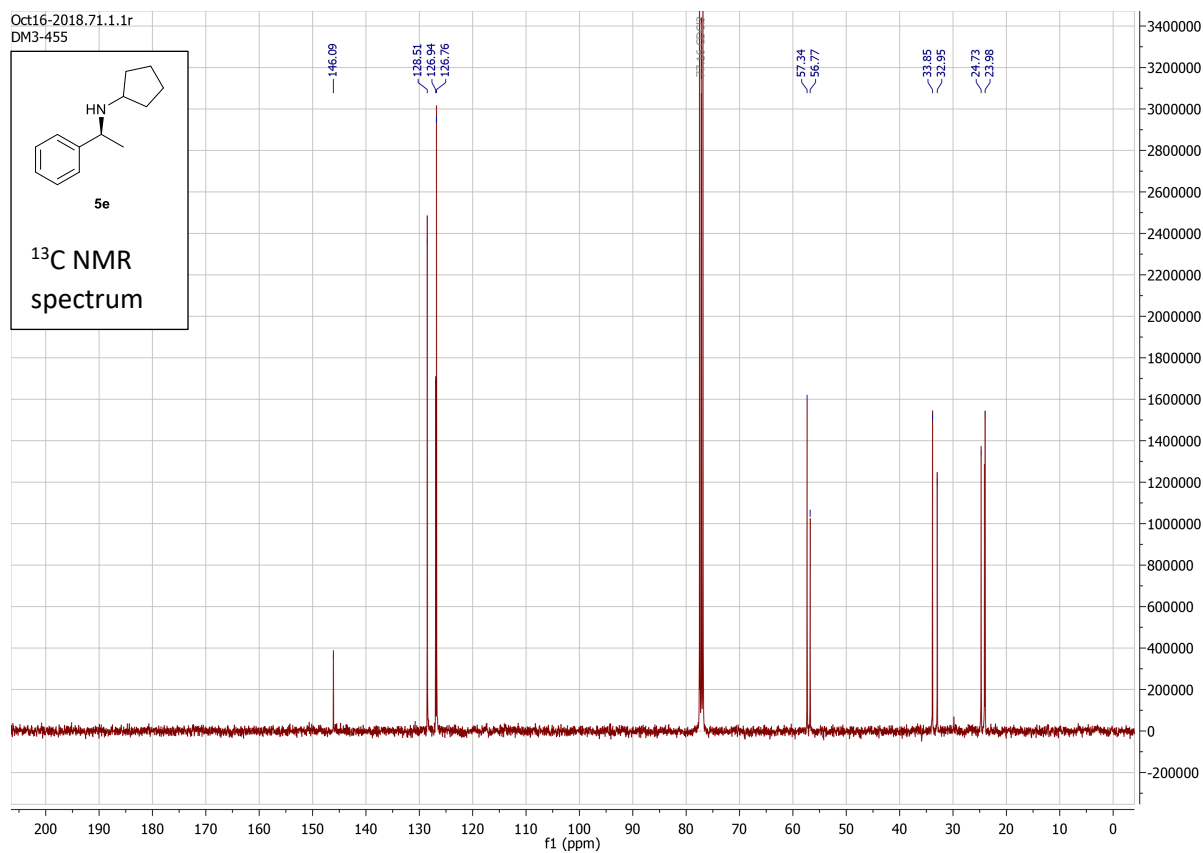

Feb14-2019.10.1.1r  
DM5-508

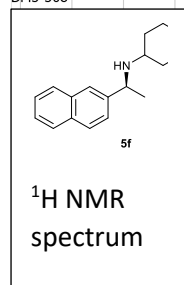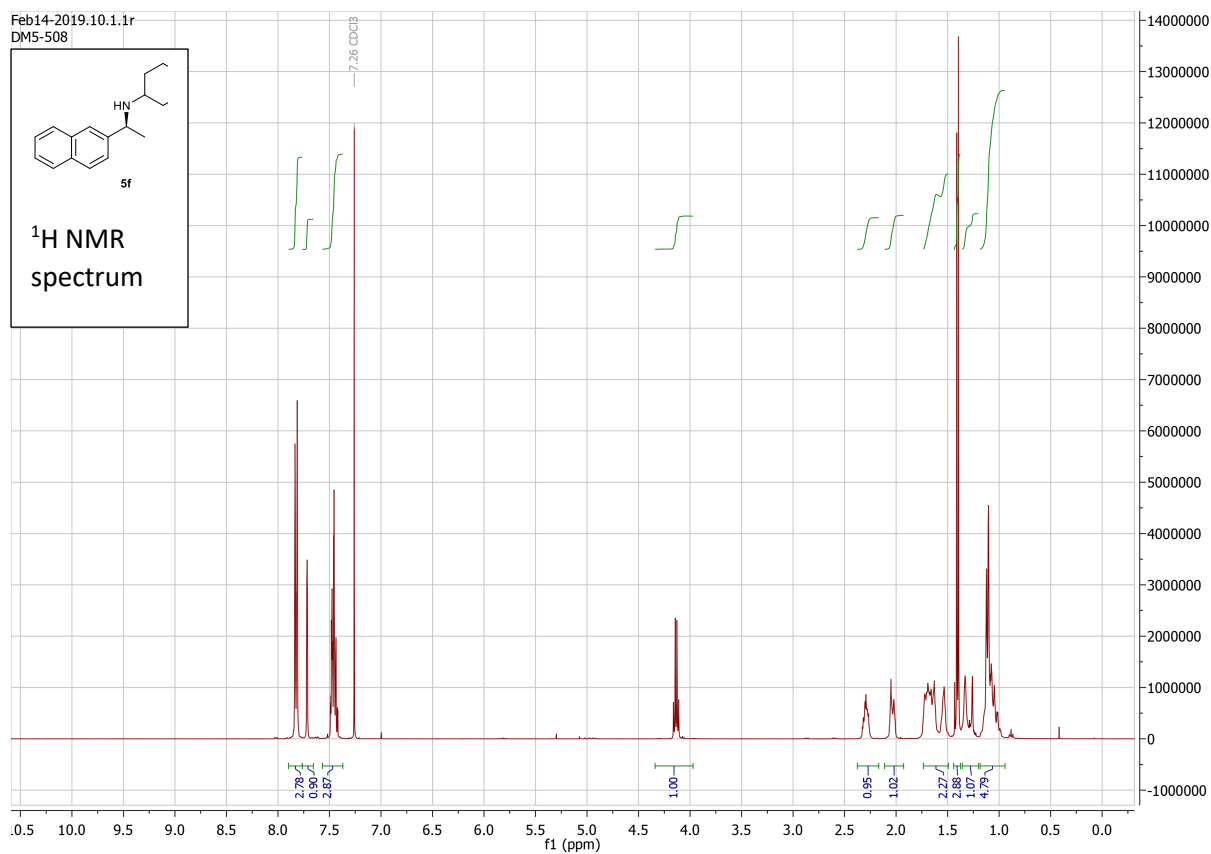

Jan21-2019.51.1.1r  
DM5-499 in cdd3

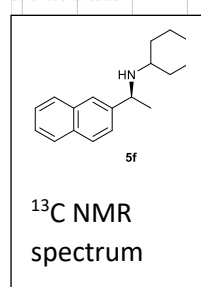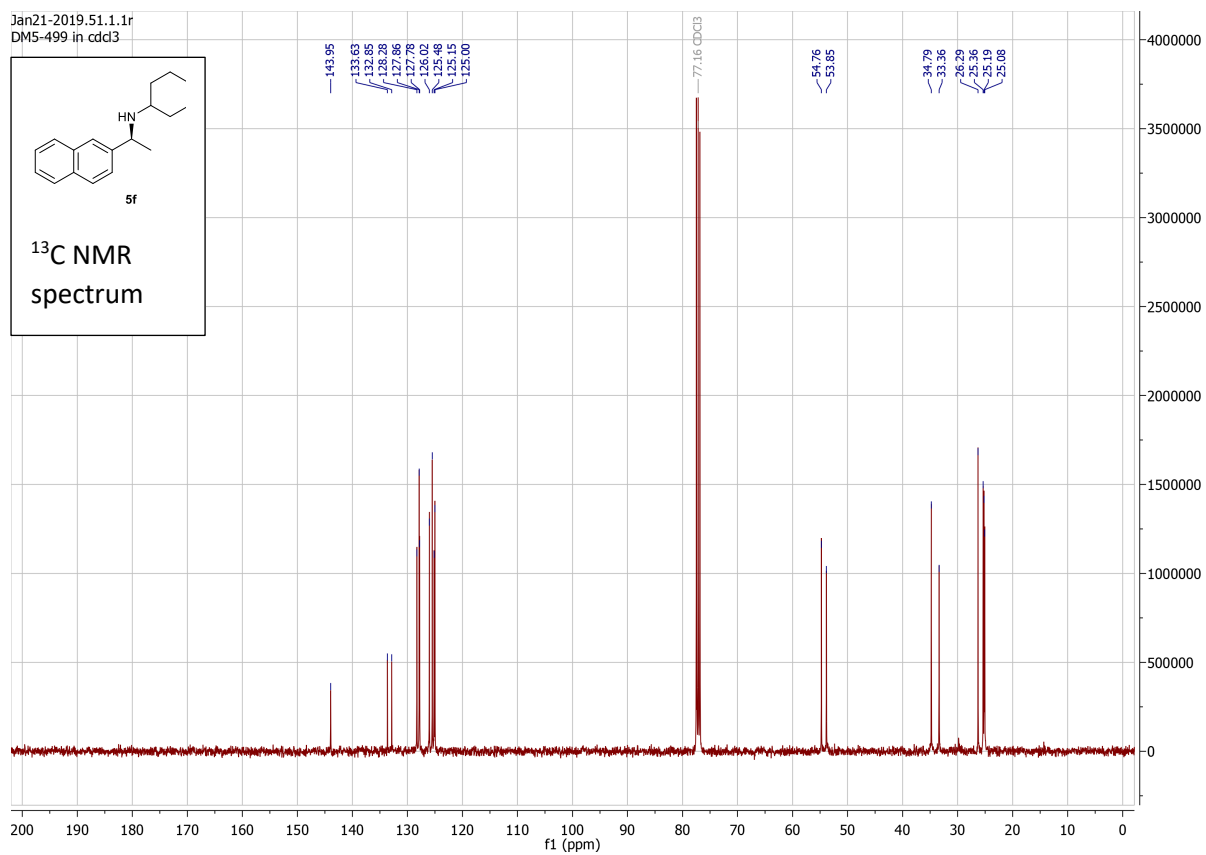



Aug03-2018.30.1.1r  
DM3-452 in CDCl3

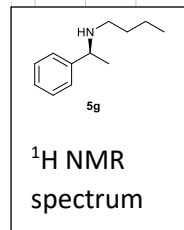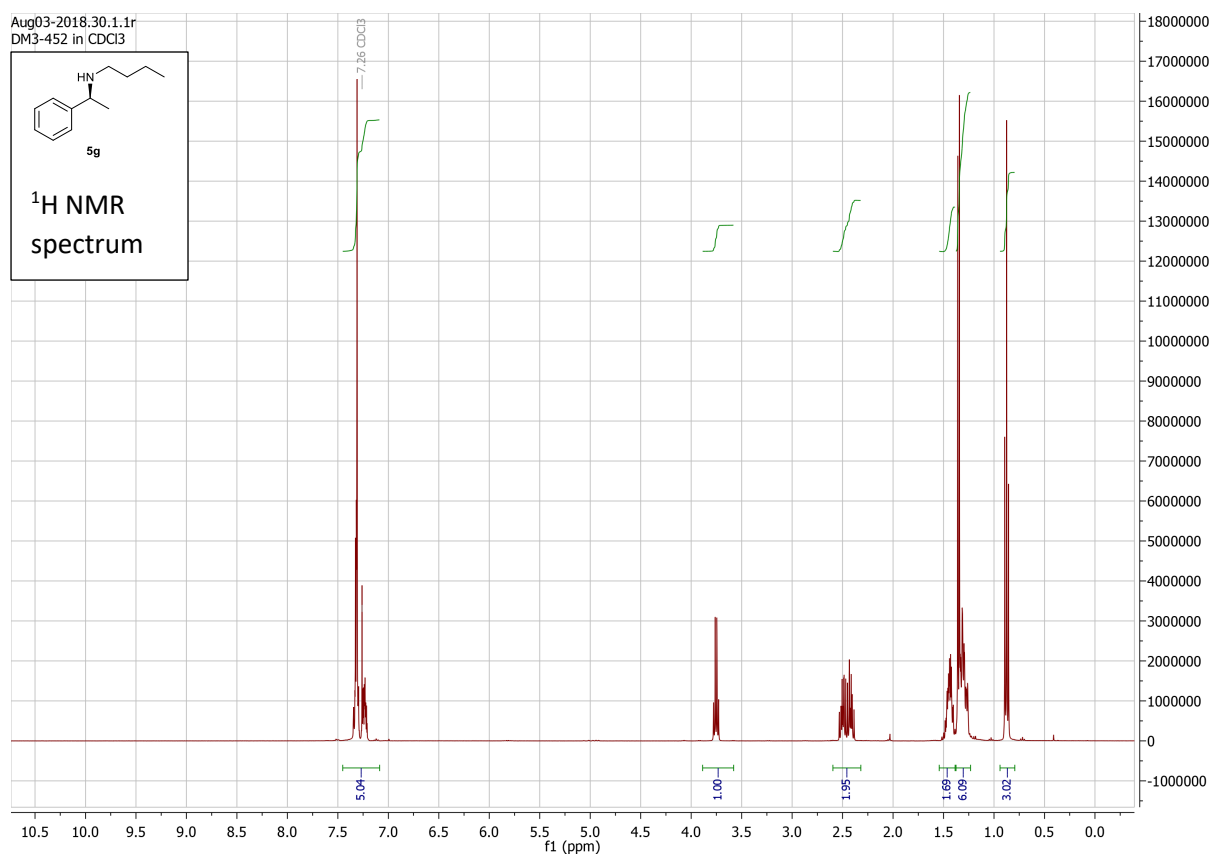

Aug03-2018.31.1.1r  
DM3-452 in CDCl3

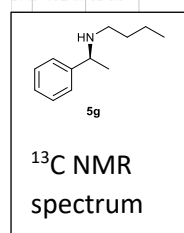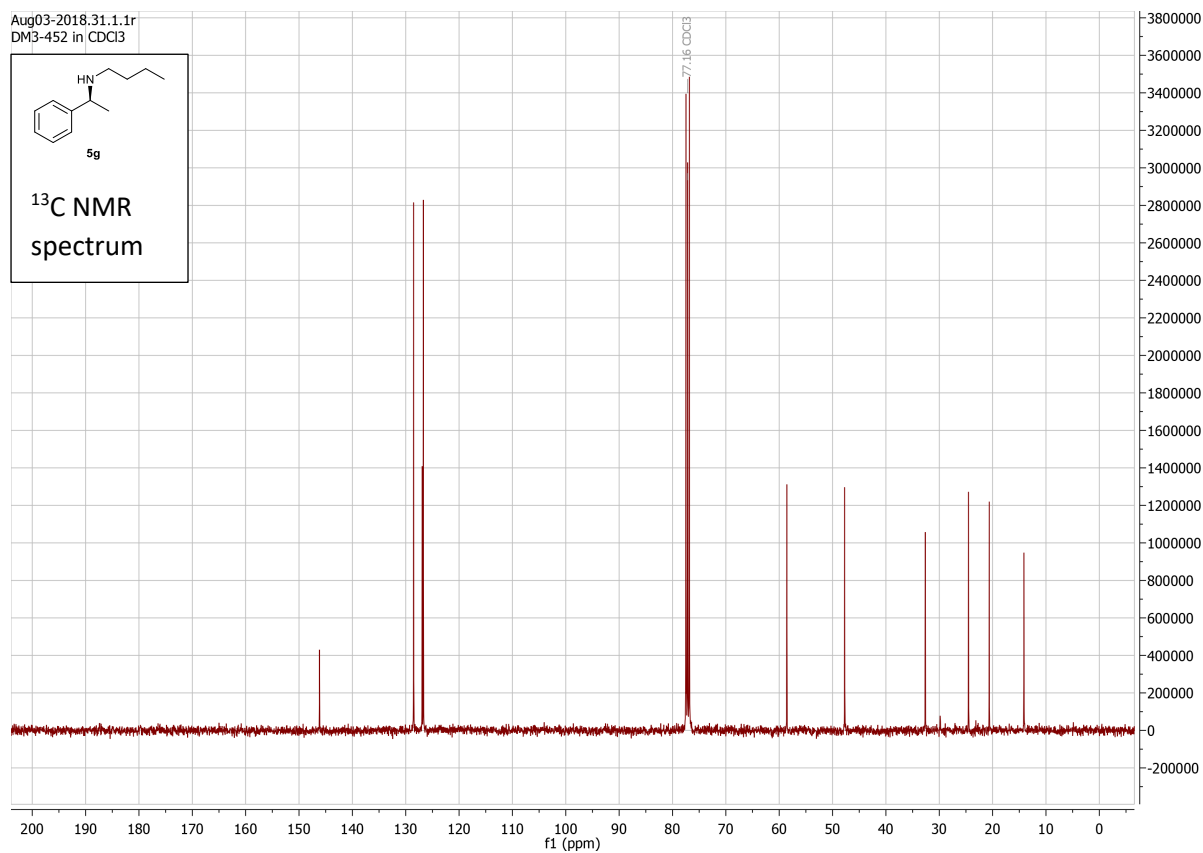

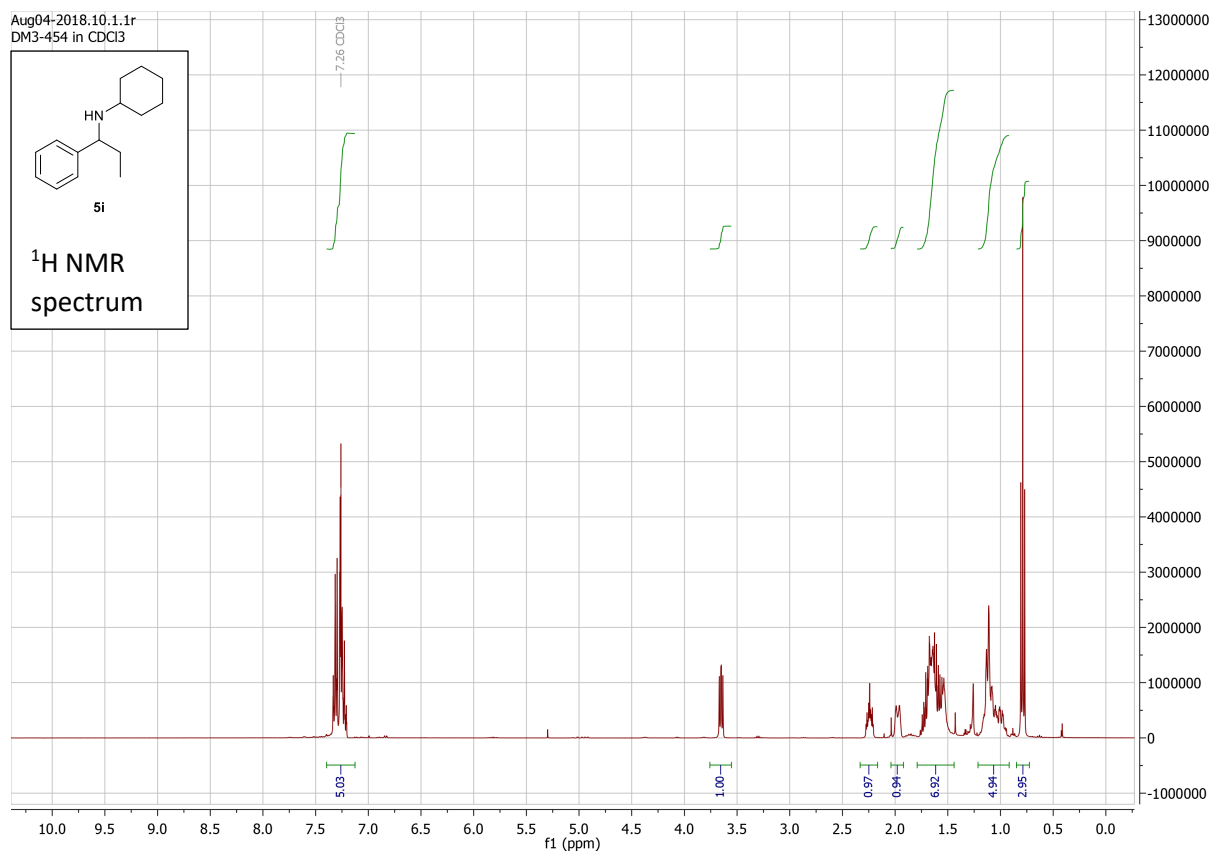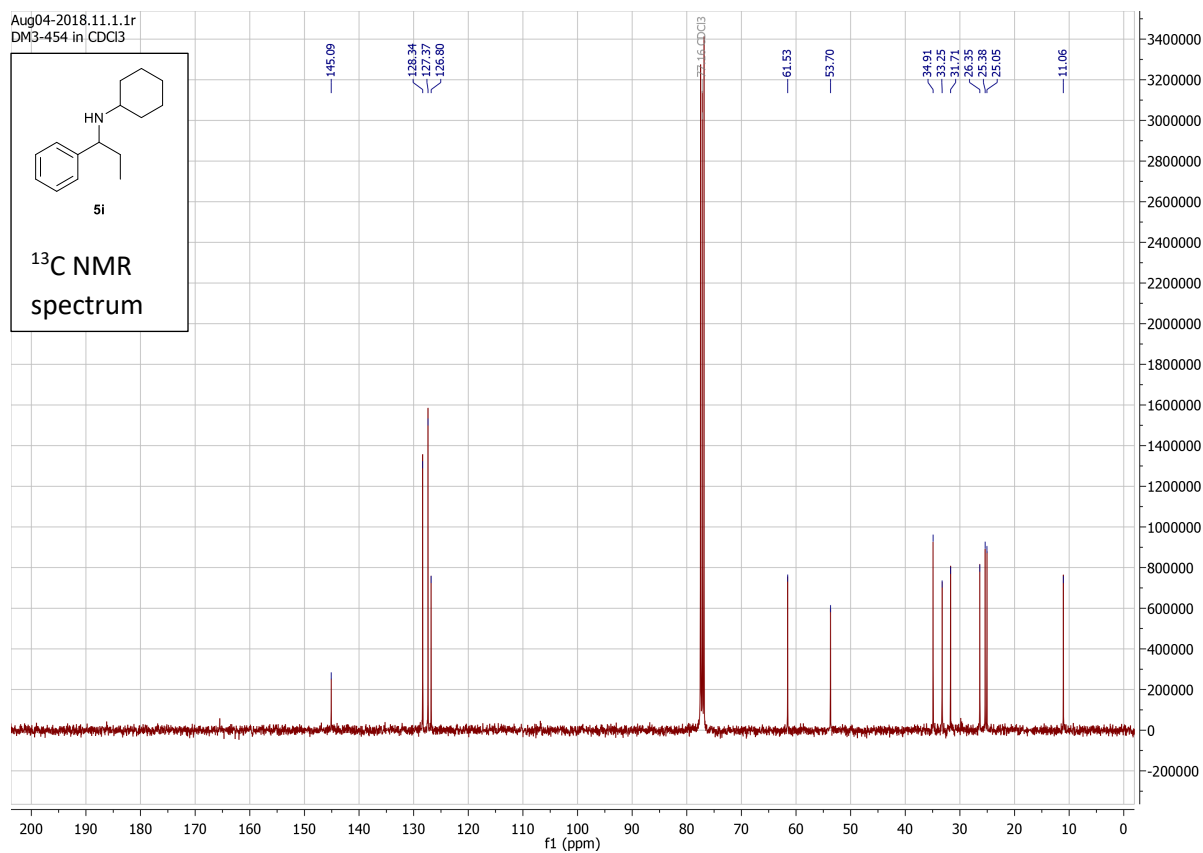

## 7.2 Characterisation data for acetamides **10**

Acetamides were prepared and purified as described in section 6.

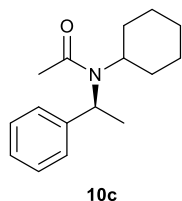

$[\alpha]_D^{23} = -30^\circ$  (c 0.69, CH<sub>2</sub>Cl<sub>2</sub>, 95:5 *e.r.*)

<sup>1</sup>H NMR (400 MHz, CDCl<sub>3</sub>, 298K) unresolved 7.4-7.15 (m, 9H); 4.91 (q, *J* = 7 Hz, 1H), 3.45 (m, 1H), 2.16 (br. s, 1H), 2.01 (br.s, 3H), 1.66 (d, *J* = 7.4 Hz, 3H), 1.93-0.95 (m, 12 H); <sup>1</sup>H NMR (500 MHz, DMSO-d<sub>6</sub>, 403K) resolved 7.37-7.29 (m, 4H), 7.22 (m, 1H), 4.97 (q, *J* = 7.4 Hz, 1H), 3.39 (m, 1H), 2.02 (s, 3H), 1.92 (m, 1H), 1.77 (m, 2H), 1.67 (m, 2H), 1.62 (d, *J* = 7.4 Hz, 3H), 1.55 (m, 1H), 1.32 (m, 2H), 1.08 (m, 2H); <sup>13</sup>C NMR (100 MHz, CDCl<sub>3</sub>) 170.6, 141.4, 128.6, 128.1, 127.4, 127, 126.9, 126.6, 55.6, 52.3, 32.6, 32.3, 31, 30, 26.5, 26.4, 25.5, 24.5, 24.1, 18.8; HRMS (ES+) calculated for C<sub>16</sub>H<sub>24</sub>NO ([M+H]<sup>+</sup>) 246.1858, found 246.1860; IR (neat, cm<sup>-1</sup>) 2926, 2851, 1635, 1427, 1379, 1362, 1306, 1247, 1178, 1025, 697, 609.

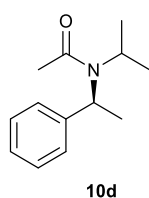

$[\alpha]_D^{22} = -44.5^\circ$  (c 0.85, CH<sub>2</sub>Cl<sub>2</sub>, 90:10 *e.r.*)

<sup>1</sup>H NMR (400 MHz, CDCl<sub>3</sub>) unresolved 7.32 (m, 8H), 5.3 (br), 4.94 (q, *J* = 6.9 Hz, 1H), 3.68 (m, 2H), 2.14 (m, 5H), 1.65 (d, *J* = 6.9 Hz, 5H), 1.32 (m, 5H), 1.09 (m, 5H); <sup>13</sup>C NMR (100 MHz, CDCl<sub>3</sub>) 170.3, 142.1, 140.9, 128.6, 128.2, 127.6, 127.1, 126.8, 55.1, 51.7, 48.1, 47.2, 24.3, 24.2, 22.5, 21.9, 21.1, 20.1, 18.2, 17.9; HRMS (ES+) calculated for C<sub>13</sub>H<sub>20</sub>NO ([M+H]<sup>+</sup>) 206.1545, found 206.1554; IR (neat, cm<sup>-1</sup>) 2968, 2931, 2875, 1635, 1195, 1437, 1429, 1378, 1370, 1310, 1204, 1132, 1025, 758, 699, 640.

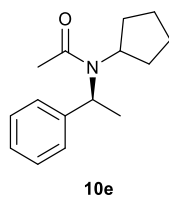

$[\alpha]_D^{25} = -27.5^\circ$  (c 0.73,  $\text{CH}_2\text{Cl}_2$ , 90:10 *e.r.*); m.p. ( $\text{CHCl}_3$ ) 66-67 °C

$^1\text{H}$  NMR (400 MHz,  $\text{CDCl}_3$ ) unresolved 7.32 (m, 7H), 5.32 (m), 4.96 (q,  $J = 6.9\text{ Hz}$ , 1H), 3.8 (m), 3.43 (m, 1H), 2.15 (s, 4H), 2.1-1.2 (m, 14H), 1.64 (d,  $J = 6.8\text{ Hz}$ );  $^{13}\text{C}$  NMR (100 MHz,  $\text{CDCl}_3$ ) 170, 141.2, 128.7, 128.3, 127.4, 126.9, 56.7, 55.8, 30.2, 26, 25.6, 25.3, 24.2, 18.5; HRMS ES+ calculated for  $\text{C}_{15}\text{H}_{22}\text{NO}$  ( $[\text{M}+\text{H}]^+$ ) 232.1701, found 232.1694; IR (neat,  $\text{cm}^{-1}$ ) 2969, 2943, 2865, 1635, 1428, 1445, 1376, 1302, 1157, 1025, 753, 697.

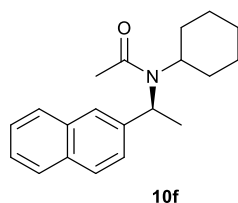

$[\alpha]_D^{24} = -51.5^\circ$  (c 0.43,  $\text{CH}_2\text{Cl}_2$ , 96:4 *e.r.*); m.p. 114.5-116 °C

$^1\text{H}$  NMR (400 MHz,  $\text{CDCl}_3$ ) unresolved 7.79 (m, 7H), 7.47 (m, 5H), 5.05 (q,  $J = 6.3\text{ Hz}$ , 1H), 3.46 (m, 1H), 2.25-2.01 (m, 5H), 1.94-1.46 (m, 11H), 1.77 (d,  $J = 6.9\text{ Hz}$ ), 1.43-0.85 (m, 4H);  $^{13}\text{C}$  NMR (100 MHz,  $\text{CDCl}_3$ ) 170.9, 170.3, 140, 138.9, 133.3, 132.6, 132.5, 128.3, 128.1, 127.7, 127.6, 126.5, 126.3, 126, 125.7, 125.5, 125.2, 55.7, 52.4, 32.7, 32.3, 31, 30, 26.5, 26.4, 25.5, 24.6, 24.2, 18.8; HRMS (ES+) calculated for  $\text{C}_{20}\text{H}_{26}\text{NO}$  ( $[\text{M}+\text{H}]^+$ ) 296.2014, found 296.2023; IR (neat,  $\text{cm}^{-1}$ ) 3055, 2926, 2851, 1636, 1437, 1427, 1183, 1377, 1362, 1307, 819, 751.

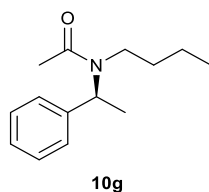

$[\alpha]_D^{25} = -66.3^\circ$  (c 0.75,  $\text{CH}_2\text{Cl}_2$ , 79:21 *e.r.*)

$^1\text{H}$  NMR (400 MHz,  $\text{CDCl}_3$ ) mixture of conformers, partially resolved, ~5:3 ratio 7.29 (m, 8H), 6.01 (q,  $J = 7.1$  Hz, 1H), 5.04 (q,  $J = 6.7$  Hz, 0.6H), 3.28 (m, 0.6H), 2.93 (m, 3H), 2.19 (s, 1.5H), 2.14 (s, 3H), 1.62 (d,  $J = 7.1$  Hz, 1.7H), 1.51 (d,  $J = 7.1$  Hz, 3H), 1.39 (m, 2H), 1.14 (m, 4H), 0.8 (2 x t, 5H);  $^{13}\text{C}$  NMR (100 MHz,  $\text{CDCl}_3$ ) 170.7, 170.4, 141.4, 141.1, 128.8, 128.5, 127.7, 127.6, 127.4, 126.8, 56.4, 51, 44.7, 43.3, 33, 31.3, 22.5, 22, 20.7, 20.5, 18.7, 17, 13.9, 13.7. IR (neat,  $\text{cm}^{-1}$ ) 2958, 2931, 2872, 1635, 1448, 1413, 1375, 1293, 1206, 1029, 697; HRMS ES+ calculated for  $\text{C}_{14}\text{H}_{22}\text{NO}$  ( $[\text{M}+\text{H}]^+$ ) 220.1701, found 220.1694.

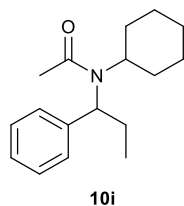

$[\alpha]_D^{25} = -16.5^\circ$  (c 0.36,  $\text{CH}_2\text{Cl}_2$ , 64:36 *e.r.*); m.p. 87-89 °C

$^1\text{H}$  NMR (400 MHz,  $\text{CDCl}_3$ ) unresolved 7.46-7.15 (m, 9H); 4.7 (m, br, 1H); 3.28 (br. s, 0.5H); 2.88 (br. s, 1H); 2.44-0.68 (31H);  $^{13}\text{C}$  NMR (100 MHz,  $\text{CDCl}_3$ ) 170.7, 170.4, 128.5, 128.3, 128.1, 127.8, 126.9, 62.7, 59.8, 56.5, 32.5, 30.3, 29.5, 26.8, 26.6, 25.5, 24.5, 24.4, 24.3, 12.1, 11.8; HRMS (ES+) calculated for  $\text{C}_{17}\text{H}_{26}\text{NO}$  ( $[\text{M}+\text{H}]^+$ ) 260.2014, found 260.2021; IR (neat,  $\text{cm}^{-1}$ ) 2963, 2917, 2930, 2872, 2849, 1632, 1437, 1425, 1381, 1373, 1313, 1261, 1026, 1004, 889, 756, 697.

### 7.3 HPLC data for amines **5a,b** and acetamides **10**

Compound **5a**: Chiralcel OD-H, IPA/hexane 1:99, 1 ml/min, 252 nm detection, t = 13.9 min, t = 17.1 min.

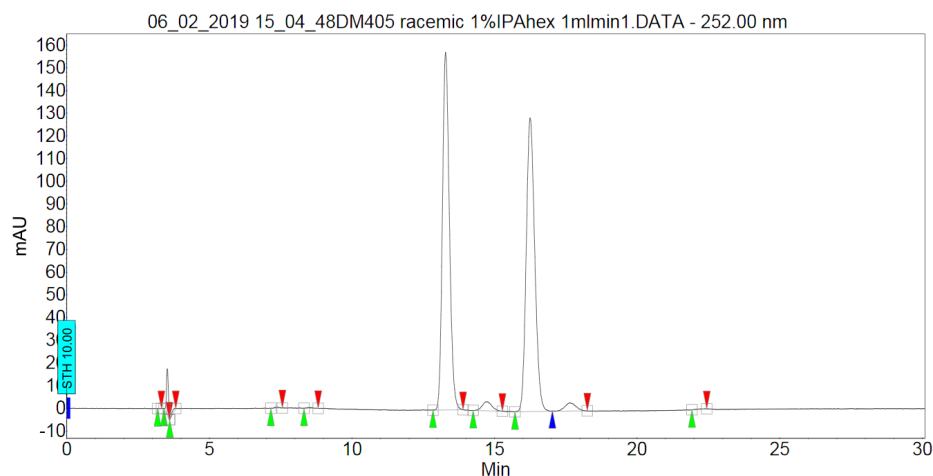

#### Peak results :

| Index | Name    | Time [Min] | Quantity [% Area] | Height [mAU] | Area [mAU.Min] | Area % [%] |
|-------|---------|------------|-------------------|--------------|----------------|------------|
| 1     | UNKNOWN | 3.253      | 0.01              | 0.0          | 0.0            | 0.010      |
| 2     | UNKNOWN | 3.520      | 1.69              | 20.3         | 1.6            | 1.690      |
| 3     | UNKNOWN | 3.733      | 0.21              | 1.7          | 0.2            | 0.210      |
| 4     | UNKNOWN | 7.386      | 0.07              | 0.4          | 0.1            | 0.066      |
| 5     | UNKNOWN | 8.533      | 0.07              | 0.3          | 0.1            | 0.071      |
| 6     | UNKNOWN | 13.279     | 47.08             | 157.6        | 44.5           | 47.080     |
| 7     | UNKNOWN | 14.732     | 1.66              | 3.9          | 1.6            | 1.665      |
| 8     | UNKNOWN | 16.252     | 47.40             | 129.4        | 44.8           | 47.397     |
| 9     | UNKNOWN | 17.652     | 1.76              | 3.7          | 1.7            | 1.765      |
| 10    | UNKNOWN | 22.212     | 0.05              | 0.2          | 0.0            | 0.046      |
| Total |         |            | 100.00            | 317.3        | 94.5           | 100.000    |

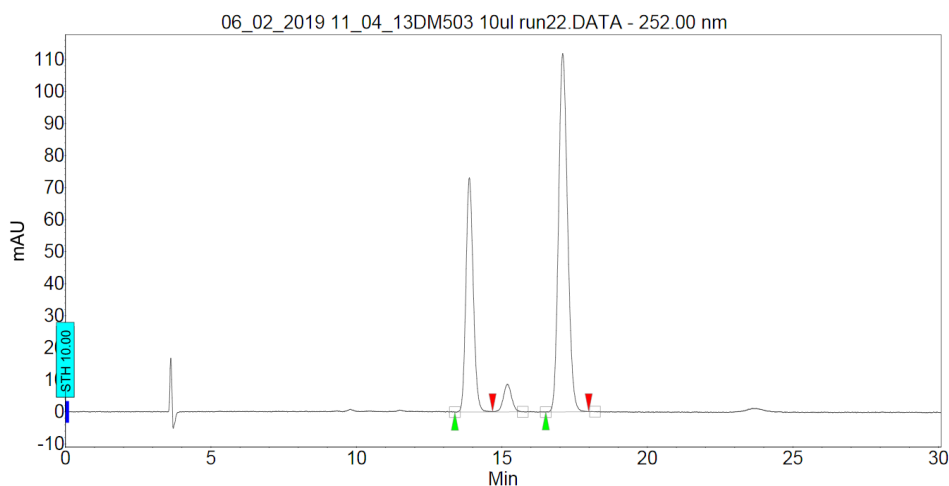

#### Peak results :

| Index | Name    | Time [Min] | Quantity [% Area] | Height [mAU] | Area [mAU.Min] | Area % [%] |
|-------|---------|------------|-------------------|--------------|----------------|------------|
| 1     | UNKNOWN | 13.879     | 34.61             | 73.1         | 21.3           | 34.614     |
| 2     | UNKNOWN | 17.092     | 65.39             | 111.9        | 40.3           | 65.386     |
| Total |         |            | 100.00            | 184.9        | 61.6           | 100.000    |

Compound **5b**: Chiralcel OD-H, IPA/hexane 0.5:99.5, 1 ml/min, 208 nm detection, t = 10.3 min, t = 12.1 min.

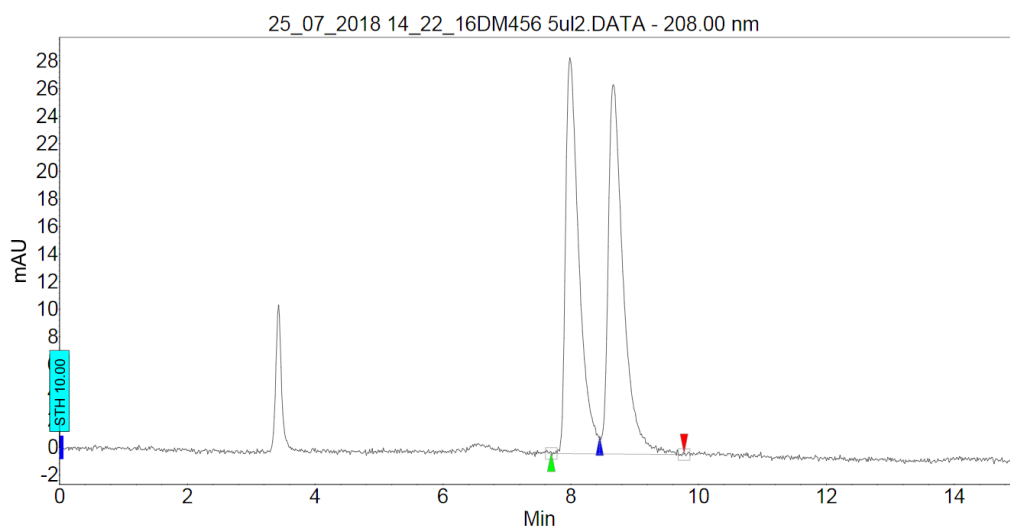

**Peak results :**

| Index | Name    | Time [Min] | Quantity [% Area] | Height [mAU] | Area [mAU.Min] | Area % [%] |
|-------|---------|------------|-------------------|--------------|----------------|------------|
| 1     | UNKNOWN | 7.987      | 48.75             | 28.7         | 7.0            | 48.754     |
| 2     | UNKNOWN | 8.667      | 51.25             | 26.8         | 7.3            | 51.246     |
| Total |         |            | 100.00            | 55.5         | 14.3           | 100.000    |

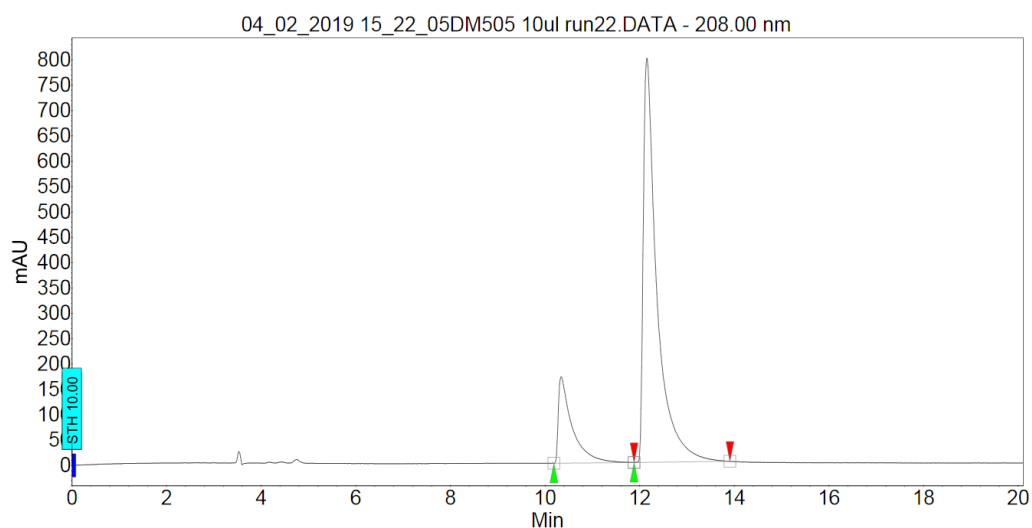

**Peak results :**

| Index | Name    | Time [Min] | Quantity [% Area] | Height [mAU] | Area [mAU.Min] | Area % [%] |
|-------|---------|------------|-------------------|--------------|----------------|------------|
| 1     | UNKNOWN | 10.333     | 17.70             | 170.4        | 57.2           | 17.703     |
| 2     | UNKNOWN | 12.146     | 82.30             | 797.2        | 265.8          | 82.297     |
| Total |         |            | 100.00            | 967.7        | 323.0          | 100.000    |

Compound **10c**: Chiralcel OD-H, IPA/hexane 5:95, 1 ml/min, 208 nm detection,  $t_R$  = 13.9 min,  $t_S$  = 20.8 min.

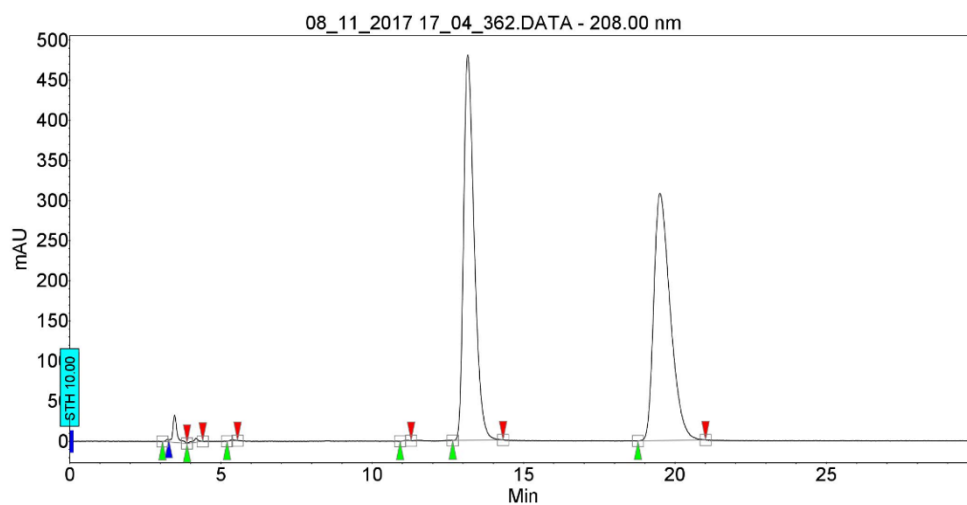

**Peak results :**

| Index | Name    | Time [Min] | Quantity [% Area] | Height [mAU] | Area [mAU.Min] | Area % [%] |
|-------|---------|------------|-------------------|--------------|----------------|------------|
| 1     | UNKNOWN | 3.226      | 0.07              | 2.7          | 0.3            | 0.074      |
| 2     | UNKNOWN | 3.466      | 1.34              | 33.9         | 5.3            | 1.343      |
| 3     | UNKNOWN | 4.173      | 0.23              | 4.7          | 0.9            | 0.226      |
| 4     | UNKNOWN | 5.373      | 0.05              | 1.3          | 0.2            | 0.053      |
| 5     | UNKNOWN | 11.119     | 0.02              | 0.4          | 0.1            | 0.023      |
| 6     | UNKNOWN | 13.159     | 49.30             | 480.1        | 195.9          | 49.299     |
| 7     | UNKNOWN | 19.505     | 48.98             | 308.0        | 194.7          | 48.982     |
| Total |         |            | 100.00            | 831.2        | 397.5          | 100.000    |

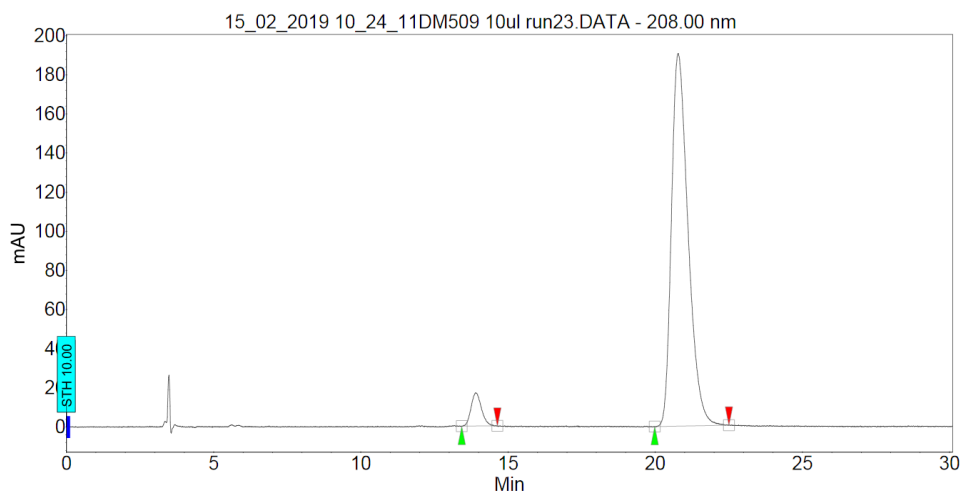

**Peak results :**

| Index | Name    | Time [Min] | Quantity [% Area] | Height [mAU] | Area [mAU.Min] | Area % [%] |
|-------|---------|------------|-------------------|--------------|----------------|------------|
| 1     | UNKNOWN | 13.906     | 5.29              | 16.8         | 7.0            | 5.288      |
| 2     | UNKNOWN | 20.785     | 94.71             | 190.4        | 124.7          | 94.712     |
| Total |         |            | 100.00            | 207.2        | 131.7          | 100.000    |



Compound **10d**: Chiralcel OD-H, IPA/hexane 5:95, 1 ml/min, 208 nm detection, t = 12.4 min, t = 23.3 min.

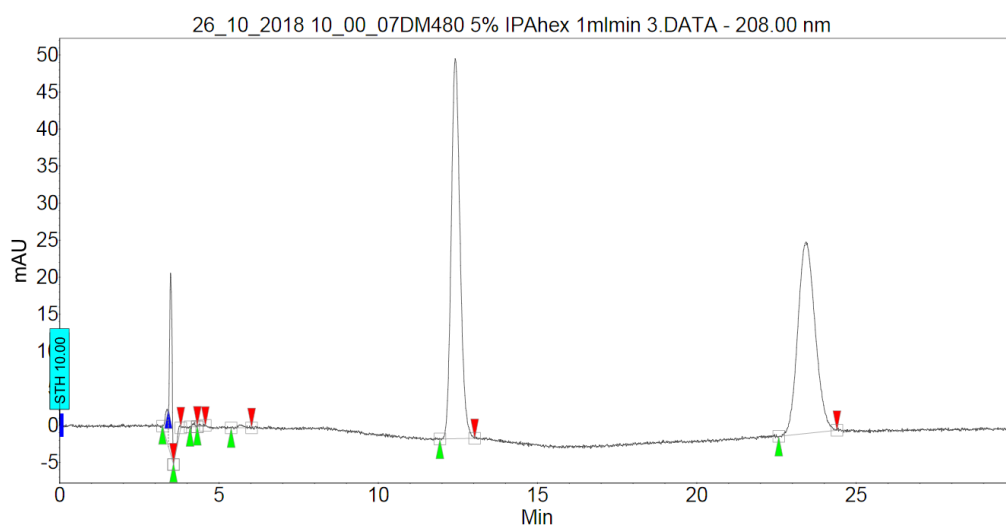

**Peak results :**

| Index | Name    | Time [Min] | Quantity [% Area] | Height [mAU] | Area [mAU.Min] | Area % [%] |
|-------|---------|------------|-------------------|--------------|----------------|------------|
| 1     | UNKNOWN | 3.413      | 1.37              | 5.0          | 0.5            | 1.373      |
| 2     | UNKNOWN | 3.480      | 6.18              | 24.4         | 2.2            | 6.177      |
| 3     | UNKNOWN | 3.746      | 0.53              | 1.3          | 0.2            | 0.531      |
| 4     | UNKNOWN | 4.200      | 0.12              | 0.3          | 0.0            | 0.117      |
| 5     | UNKNOWN | 4.426      | 0.07              | 0.1          | 0.0            | 0.069      |
| 6     | UNKNOWN | 5.706      | 0.22              | 0.3          | 0.1            | 0.219      |
| 7     | UNKNOWN | 12.412     | 45.94             | 51.3         | 16.4           | 45.938     |
| 8     | UNKNOWN | 23.425     | 45.58             | 25.9         | 16.3           | 45.577     |
| Total |         |            | 100.00            | 108.7        | 35.7           | 100.000    |

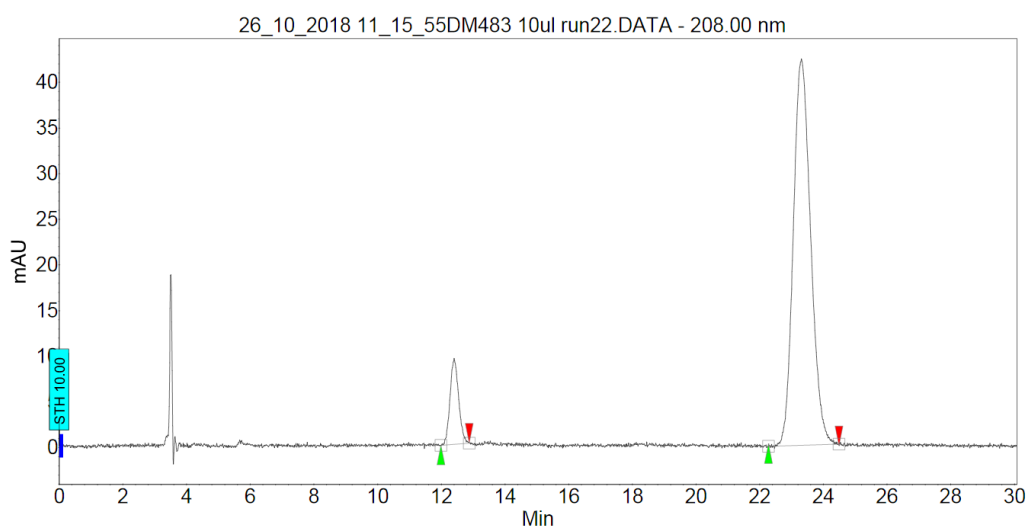

**Peak results :**

| Index | Name    | Time [Min] | Quantity [% Area] | Height [mAU] | Area [mAU.Min] | Area % [%] |
|-------|---------|------------|-------------------|--------------|----------------|------------|
| 1     | UNKNOWN | 12.399     | 9.88              | 9.4          | 2.9            | 9.885      |
| 2     | UNKNOWN | 23.305     | 90.12             | 42.3         | 26.7           | 90.115     |
| Total |         |            | 100.00            | 51.7         | 29.6           | 100.000    |

Compound **10e**: Chiralcel OD-H, IPA/hexane 5:95, 1 ml/min, 208 nm detection, t = 12.9 min, t = 25.8 min.

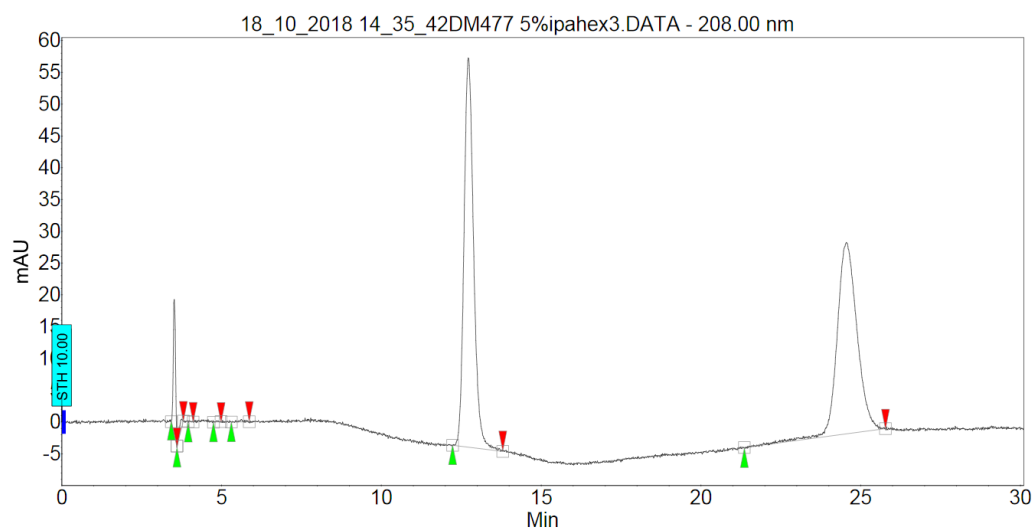

**Peak results :**

| Index | Name    | Time [Min] | Quantity [% Area] | Height [mAU] | Area [mAU.Min] | Area % [%] |
|-------|---------|------------|-------------------|--------------|----------------|------------|
| 1     | UNKNOWN | 3.520      | 3.91              | 21.3         | 1.8            | 3.907      |
| 2     | UNKNOWN | 3.720      | 0.45              | 1.7          | 0.2            | 0.455      |
| 3     | UNKNOWN | 3.960      | 0.02              | 0.1          | 0.0            | 0.019      |
| 4     | UNKNOWN | 4.853      | 0.03              | 0.1          | 0.0            | 0.027      |
| 5     | UNKNOWN | 5.586      | 0.12              | 0.2          | 0.1            | 0.115      |
| 6     | UNKNOWN | 12.719     | 47.25             | 61.2         | 21.2           | 47.248     |
| 7     | UNKNOWN | 24.545     | 48.23             | 30.1         | 21.7           | 48.228     |
| Total |         |            | 100.00            | 114.9        | 44.9           | 100.000    |

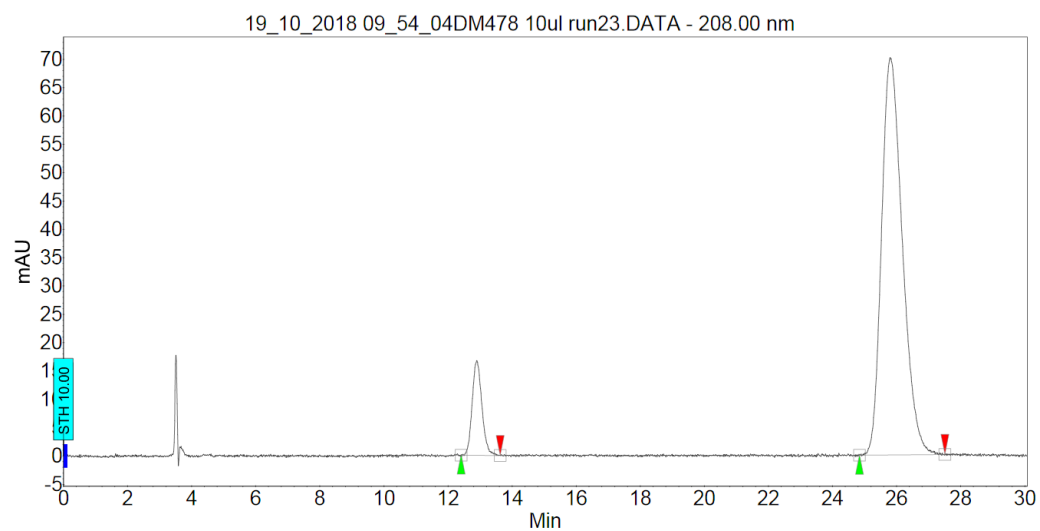

**Peak results :**

| Index | Name    | Time [Min] | Quantity [% Area] | Height [mAU] | Area [mAU.Min] | Area % [%] |
|-------|---------|------------|-------------------|--------------|----------------|------------|
| 1     | UNKNOWN | 12.892     | 10.03             | 16.7         | 5.9            | 10.030     |
| 2     | UNKNOWN | 25.811     | 89.97             | 69.9         | 52.7           | 89.970     |
| Total |         |            | 100.00            | 86.6         | 58.6           | 100.000    |

Compound **10f**: Chiralcel OD-H, IPA/hexane 5:95, 1 ml/min, 208 nm detection, t = 17.5 min, t = 21.5 min.

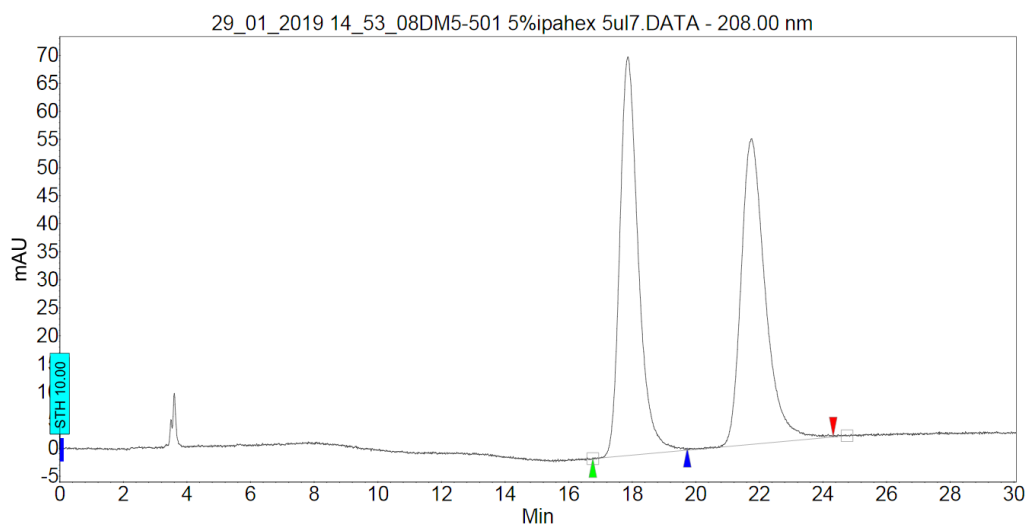

**Peak results :**

| Index | Name    | Time [Min] | Quantity [% Area] | Height [mAU] | Area [mAU.Min] | Area % [%] |
|-------|---------|------------|-------------------|--------------|----------------|------------|
| 1     | UNKNOWN | 17.852     | 49.90             | 71.0         | 47.9           | 49.901     |
| 2     | UNKNOWN | 21.745     | 50.10             | 54.4         | 48.1           | 50.099     |
| Total |         |            | 100.00            | 125.4        | 95.9           | 100.000    |

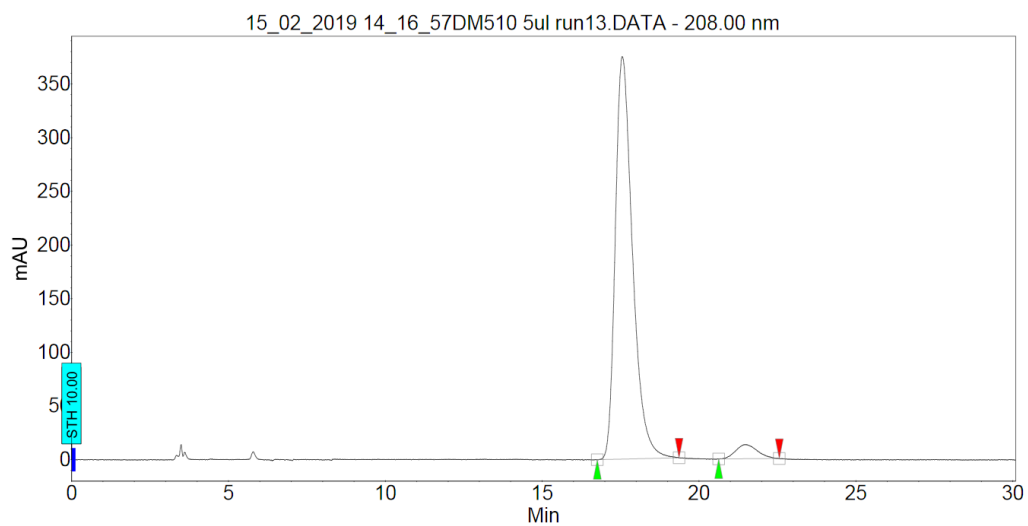

**Peak results :**

| Index | Name    | Time [Min] | Quantity [% Area] | Height [mAU] | Area [mAU.Min] | Area % [%] |
|-------|---------|------------|-------------------|--------------|----------------|------------|
| 1     | UNKNOWN | 17.545     | 95.69             | 375.2        | 238.4          | 95.692     |
| 2     | UNKNOWN | 21.478     | 4.31              | 13.3         | 10.7           | 4.308      |
| Total |         |            | 100.00            | 388.5        | 249.1          | 100.000    |

Compound **10g**: Chiralcel OD-H, IPA/hexane 5:95, 1 ml/min, 208 nm detection, t = 9.4 min, t = 11 min.

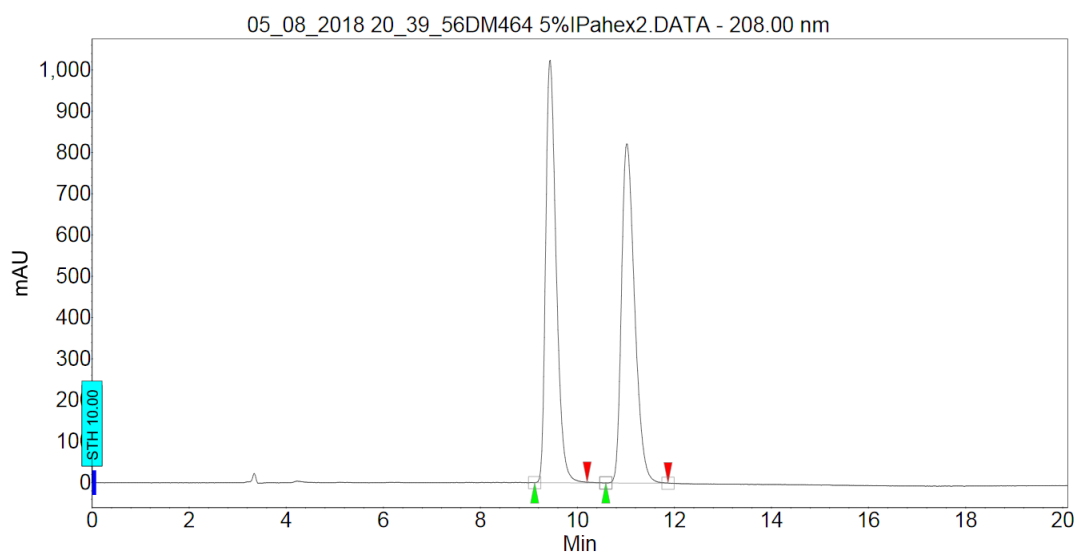

**Peak results :**

| Index | Name    | Time [Min] | Quantity [% Area] | Height [mAU] | Area [mAU.Min] | Area % [%] |
|-------|---------|------------|-------------------|--------------|----------------|------------|
| 1     | UNKNOWN | 9.439      | 49.90             | 1023.6       | 256.5          | 49.903     |
| 2     | UNKNOWN | 11.013     | 50.10             | 821.2        | 257.5          | 50.097     |
| Total |         |            | 100.00            | 1844.9       | 514.1          | 100.000    |

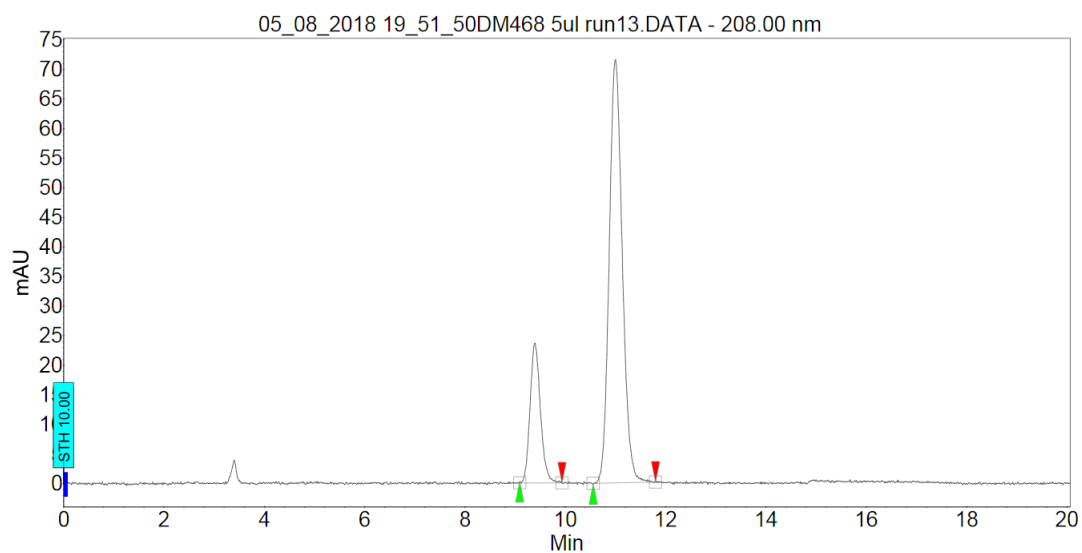

**Peak results :**

| Index | Name    | Time [Min] | Quantity [% Area] | Height [mAU] | Area [mAU.Min] | Area % [%] |
|-------|---------|------------|-------------------|--------------|----------------|------------|
| 1     | UNKNOWN | 9.399      | 20.79             | 23.6         | 5.7            | 20.787     |
| 2     | UNKNOWN | 10.999     | 79.21             | 71.6         | 21.6           | 79.213     |
| Total |         |            | 100.00            | 95.1         | 27.2           | 100.000    |

Compound **10i**: Chiralcel OD-H, IPA/hexane 5:95, 1 ml/min, 208 nm detection, t = 11.9 min, t = 17.1 min.

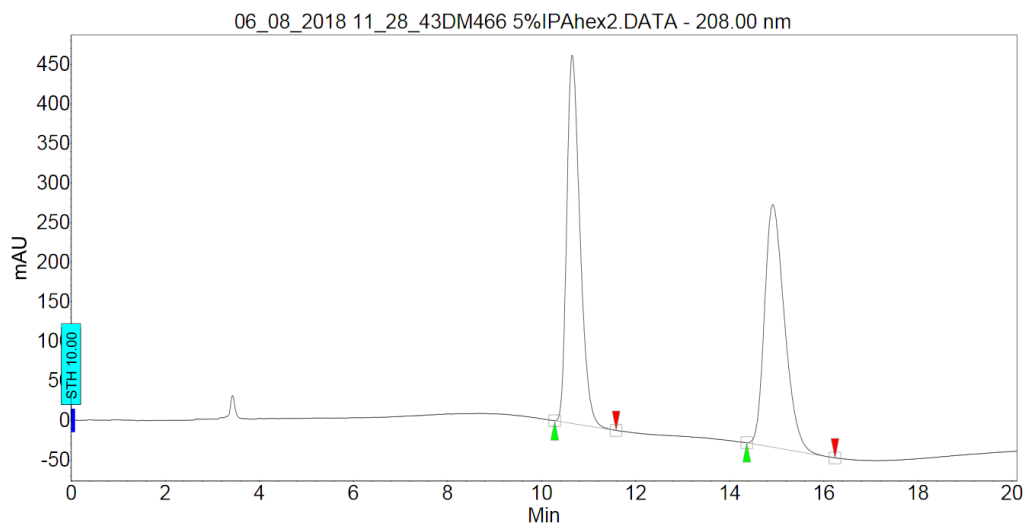

**Peak results :**

| Index | Name    | Time [Min] | Quantity [% Area] | Height [mAU] | Area [mAU.Min] | Area % [%] |
|-------|---------|------------|-------------------|--------------|----------------|------------|
| 1     | UNKNOWN | 10.653     | 50.12             | 465.3        | 151.5          | 50.124     |
| 2     | UNKNOWN | 14.919     | 49.88             | 306.7        | 150.7          | 49.876     |
| Total |         |            | 100.00            | 772.0        | 302.2          | 100.000    |

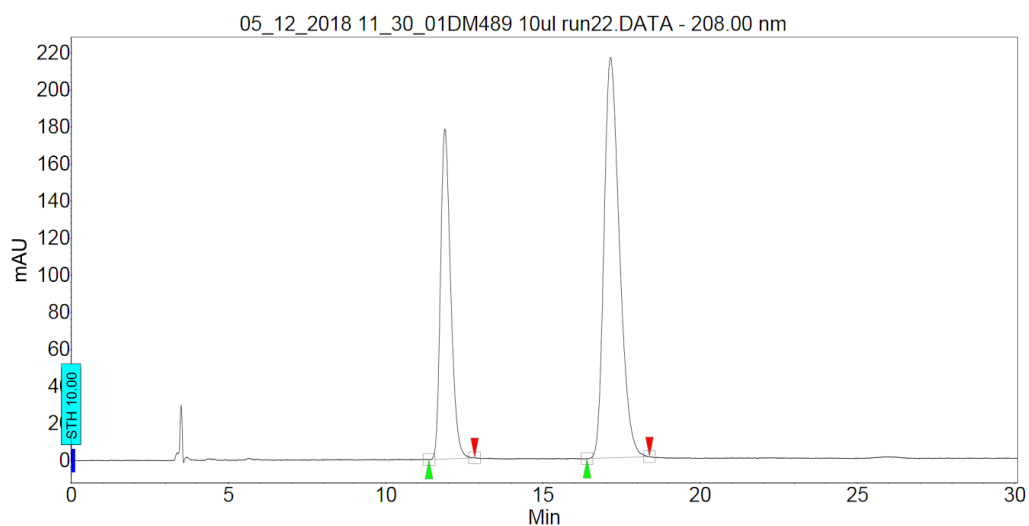

**Peak results :**

| Index | Name    | Time [Min] | Quantity [% Area] | Height [mAU] | Area [mAU.Min] | Area % [%] |
|-------|---------|------------|-------------------|--------------|----------------|------------|
| 1     | UNKNOWN | 11.879     | 35.10             | 178.2        | 66.5           | 35.098     |
| 2     | UNKNOWN | 17.145     | 64.90             | 216.1        | 122.9          | 64.902     |
| Total |         |            | 100.00            | 394.3        | 189.4          | 100.000    |

## 8. References

- 1 L. Palatinus and G. Chapuis, *J. Appl. Crystallogr.*, 2007, **40**, 786–790.
- 2 G. M. Sheldrick, *Acta Crystallogr. Sect. C Struct. Chem.*, 2015, **71**, 3–8.
- 3 J. M. Farrell, J. A. Hatnean and D. W. Stephan, *J. Am. Chem. Soc.*, 2012, **134**, 15728–15731.
- 4 J. Barluenga, A. Jiménez-Aquino, F. Aznar and C. Valdés, *J. Am. Chem. Soc.*, 2009, **131**, 4031–4041.
- 5 R. Carlson, U. Larsson, L. Hansson, H. M. Nielsen, F. M. Piedade, M. M. Kady and S. B. Christensen, *Acta Chem. Scand.*, 1992, **46**, 1211–1214.
- 6 H. Feuer and R. M. McMillan, *J. Org. Chem.*, 1979, **44**, 3410–3412.
- 7 J. J. M. Weemers, F. D. Sypaseuth, P. S. Bäuerlein, W. N. P. van der Graaff, I. A. W. Pilot, M. Lutz and C. Müller, *European J. Org. Chem.*, 2014, **2014**, 350–362.
- 8 Q. Yin, Y. Soltani, R. L. Melen and M. Oestreich, *Organometallics*, 2017, **36**, 2381–2384.
- 9 D. T. Hog and M. Oestreich, *European J. Org. Chem.*, 2009, **2009**, 5047–5056.
- 10 G. Wittig and U. Thiele, *Justus Liebigs Ann. Chem.*, 1969, **726**, 1–12.
- 11 S. Yamaguchi, F. Yasuhara and K. Kabuto, *J. Org. Chem.*, 1977, **42**, 1578–1581.
- 12 B. E. Rossiter, M. Eguchi, G. Miao, N. M. Swingle, A. E. Hernández, D. Vickers, E. Fluckiger, R. Greg Patterson and K. Vásavi Reddy, *Tetrahedron*, 1993, **49**, 965–986.
- 13 S. Takenaka, M. Ako, T. Kotani, A. Matsubara and N. Tokura, *J. Chem. Soc., Perkin Trans. 2*, 1978, 95–99.
- 14 M. Rouen, P. Chaumont, G. Barozzino-Consiglio, J. Maddaluno and A. Harrison-Marchand, *Chem. - A Eur. J.*, 2018, **24**, 9238–9242.

15 D. Niu and S. L. Buchwald, *J. Am. Chem. Soc.*, 2015, **137**, 9716–9721.
